# Supplementary material for: Establishing Heat Alert Thresholds for the Varied Climatic Regions of British Columbia, Canada
Source: MDPI journal article supplement (doi:10.3390/ijerph15092048), 2018-09-19

Northeast

Category:  No Alert  Category 2  Category 1  Category 0

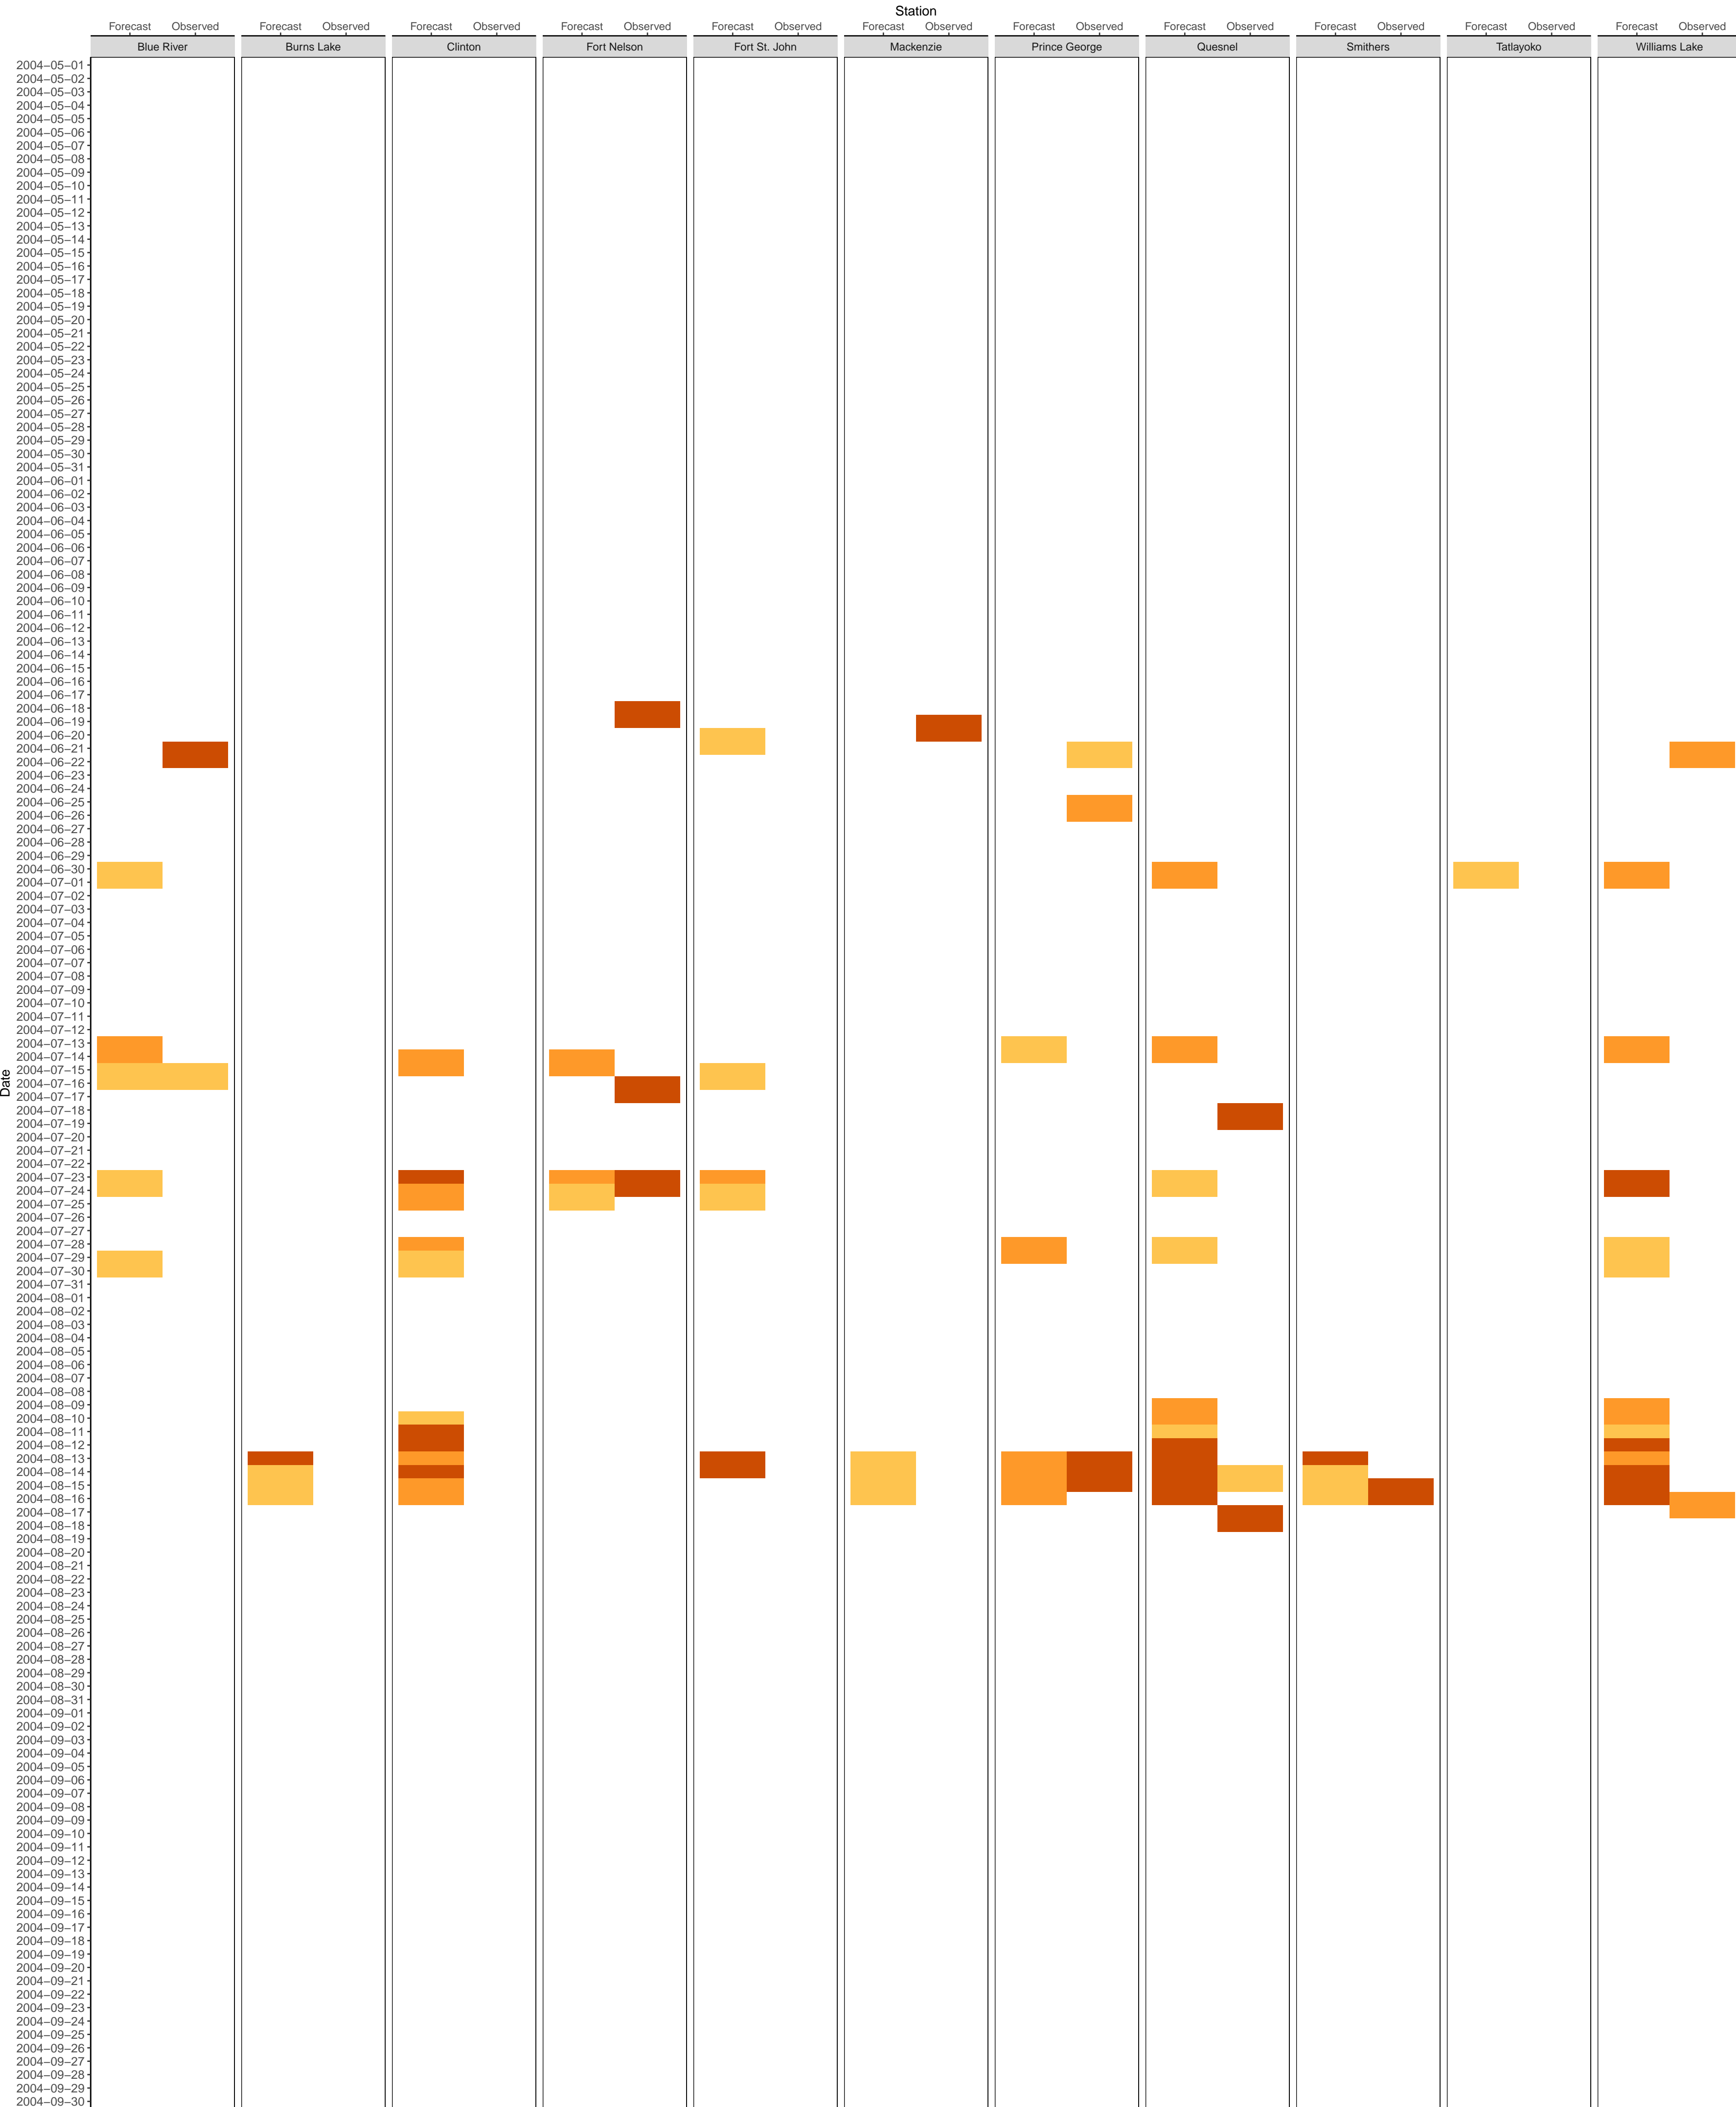



Northeast

Category:  No Alert  Category 2  Category 1  Category 0

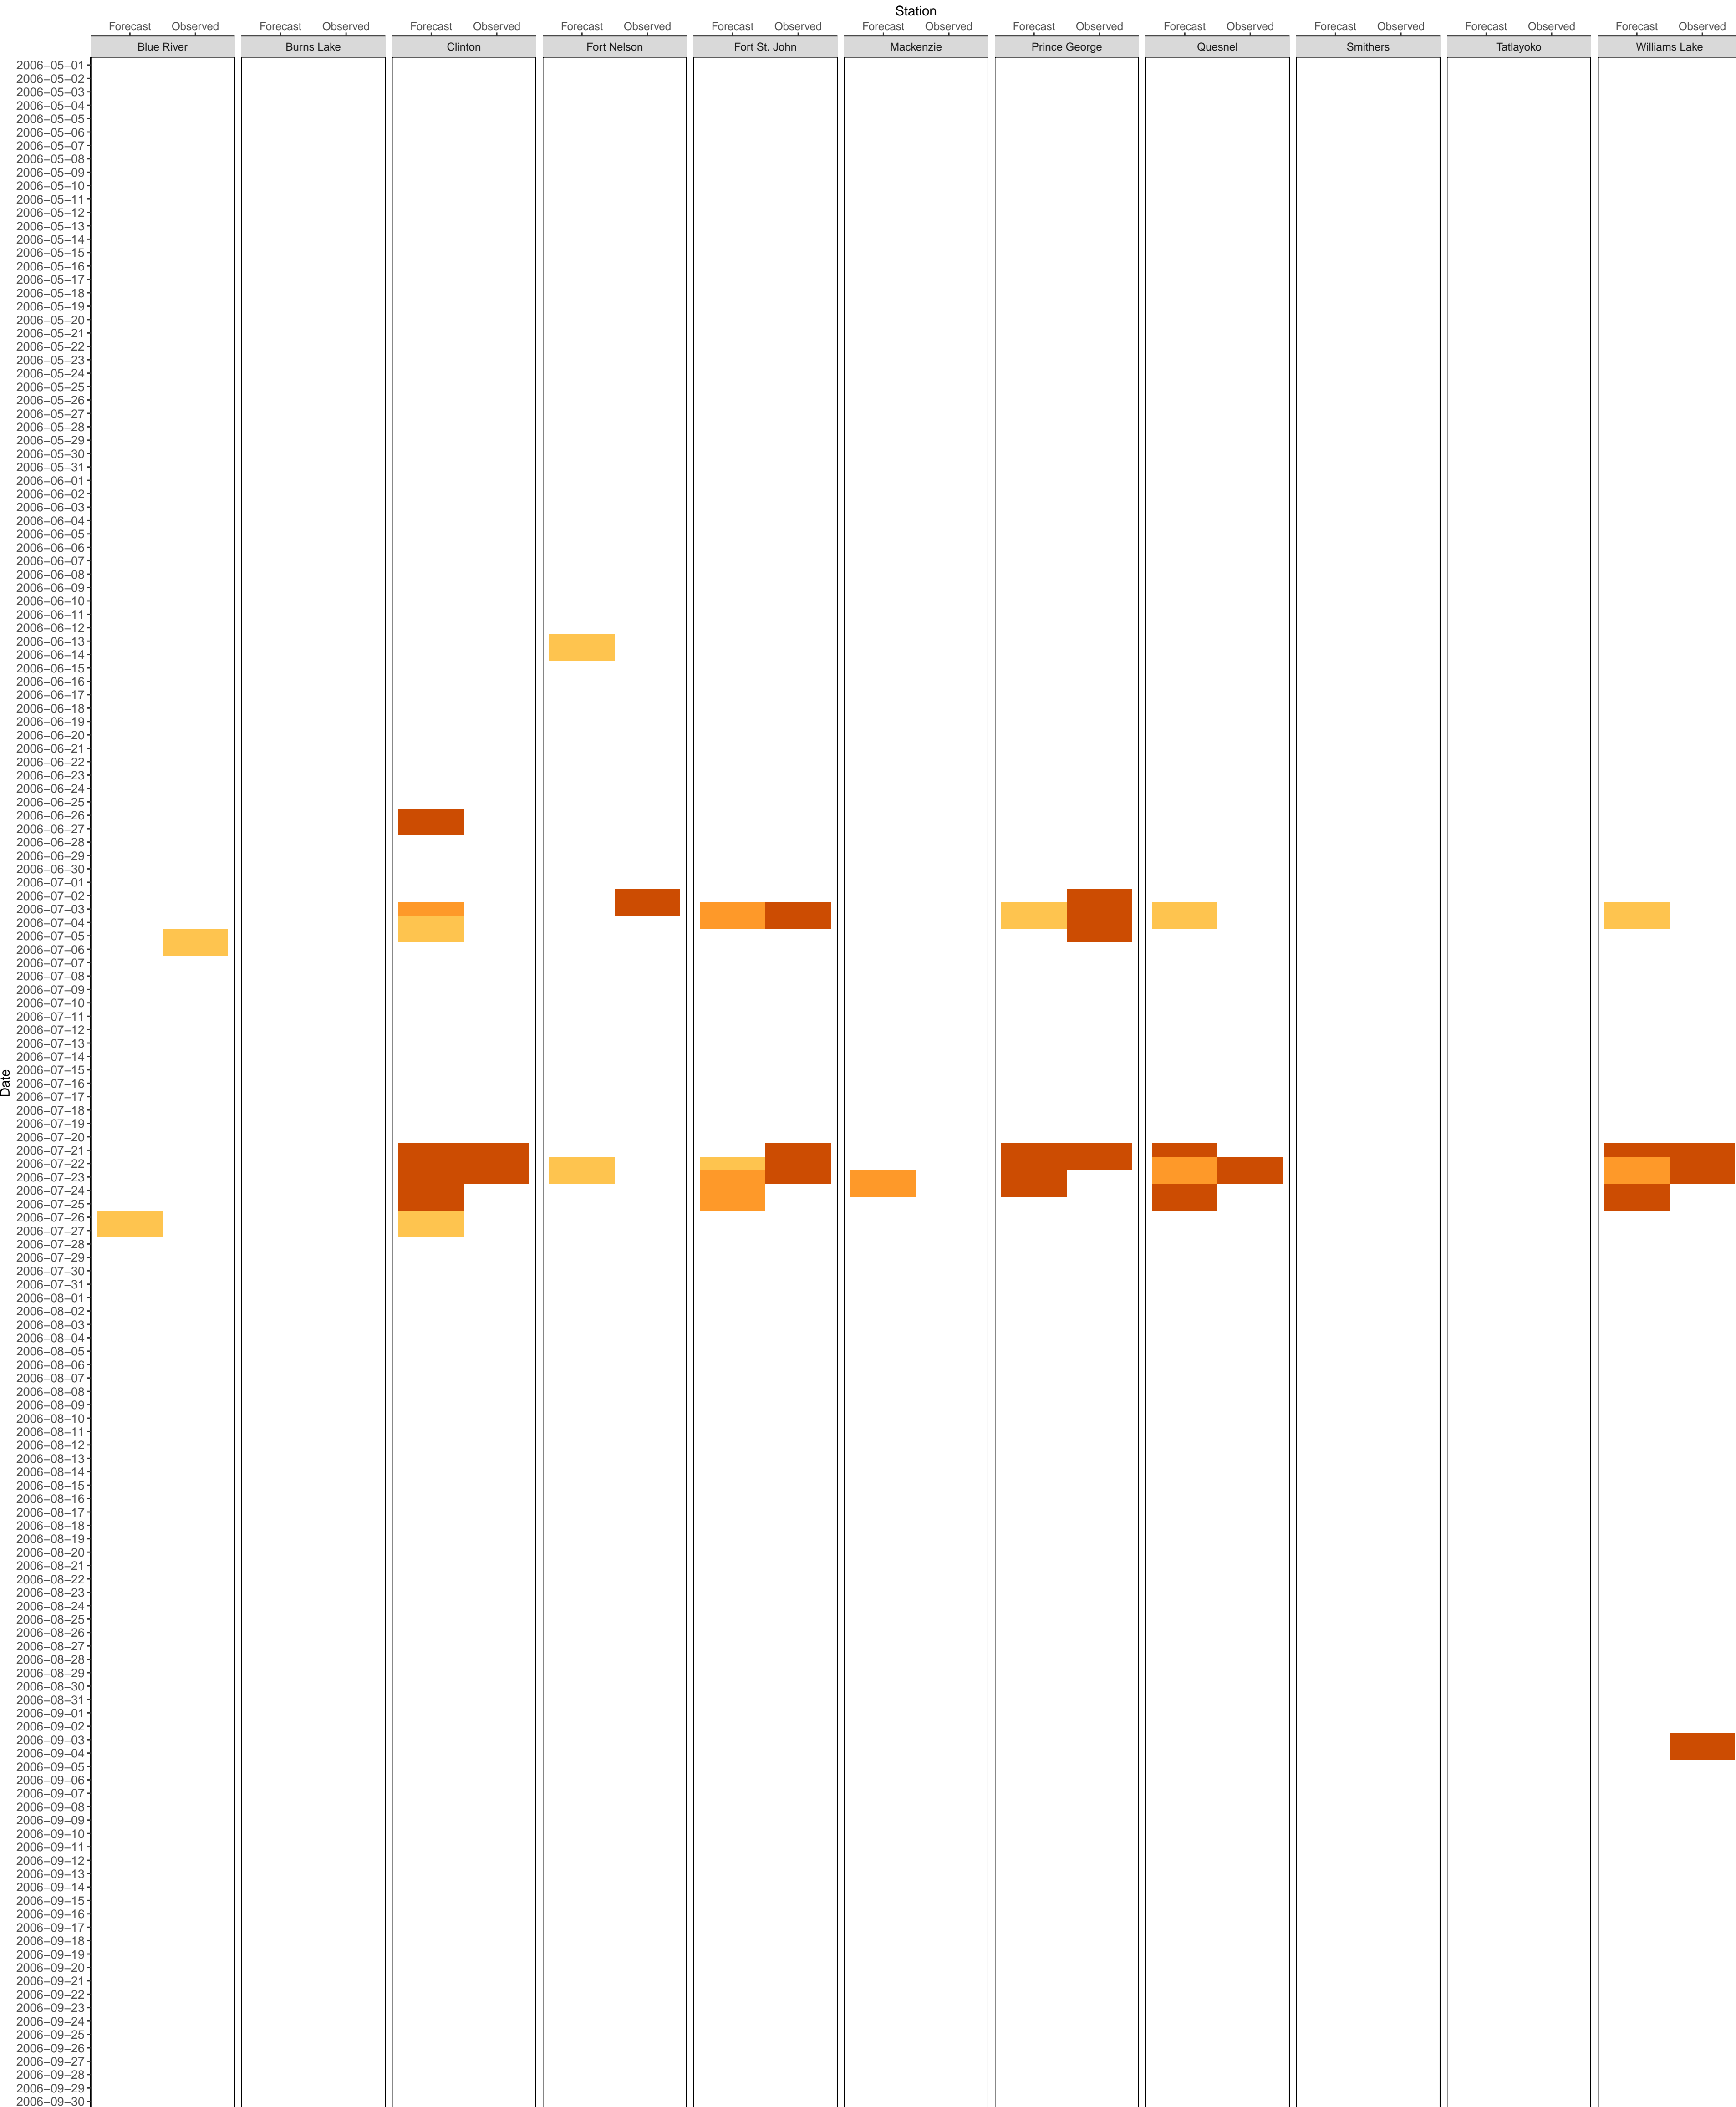

Northeast

Category: ☐ No Alert ☐ Category 2 ☐ Category 1 ☐ Category 0

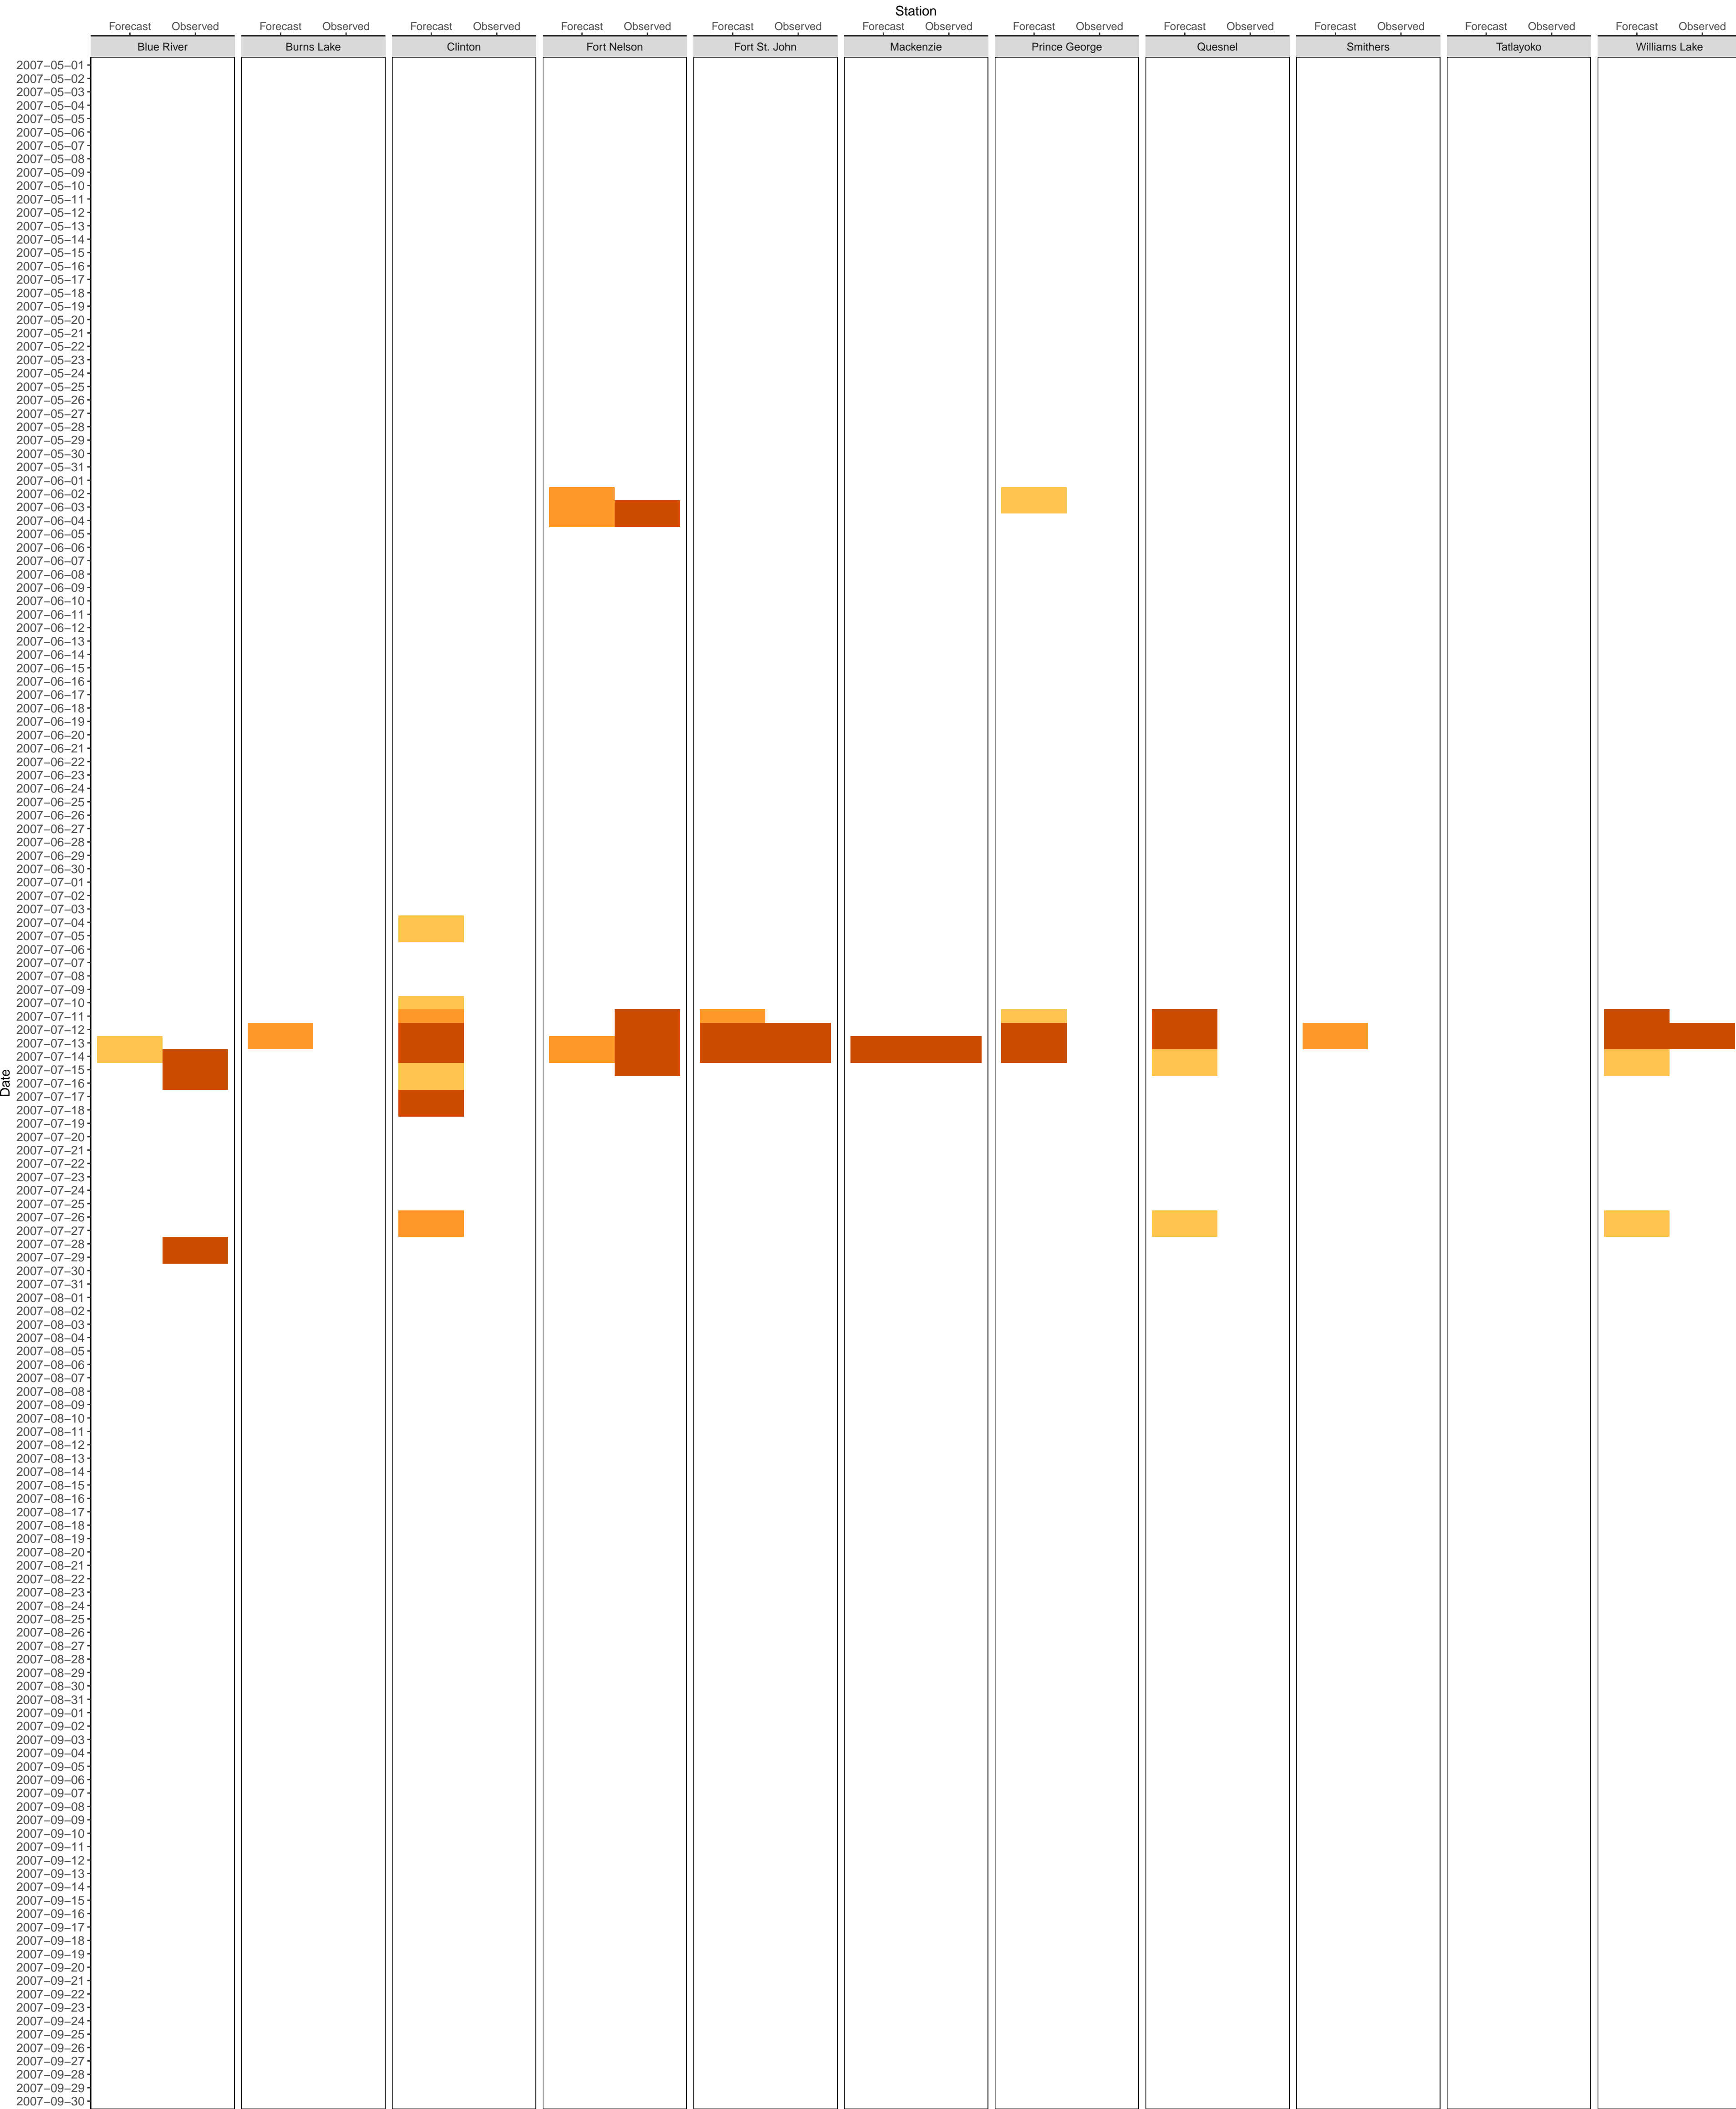

Northeast

Category: ☐ No Alert ☐ Category 2 ☐ Category 1 ☐ Category 0

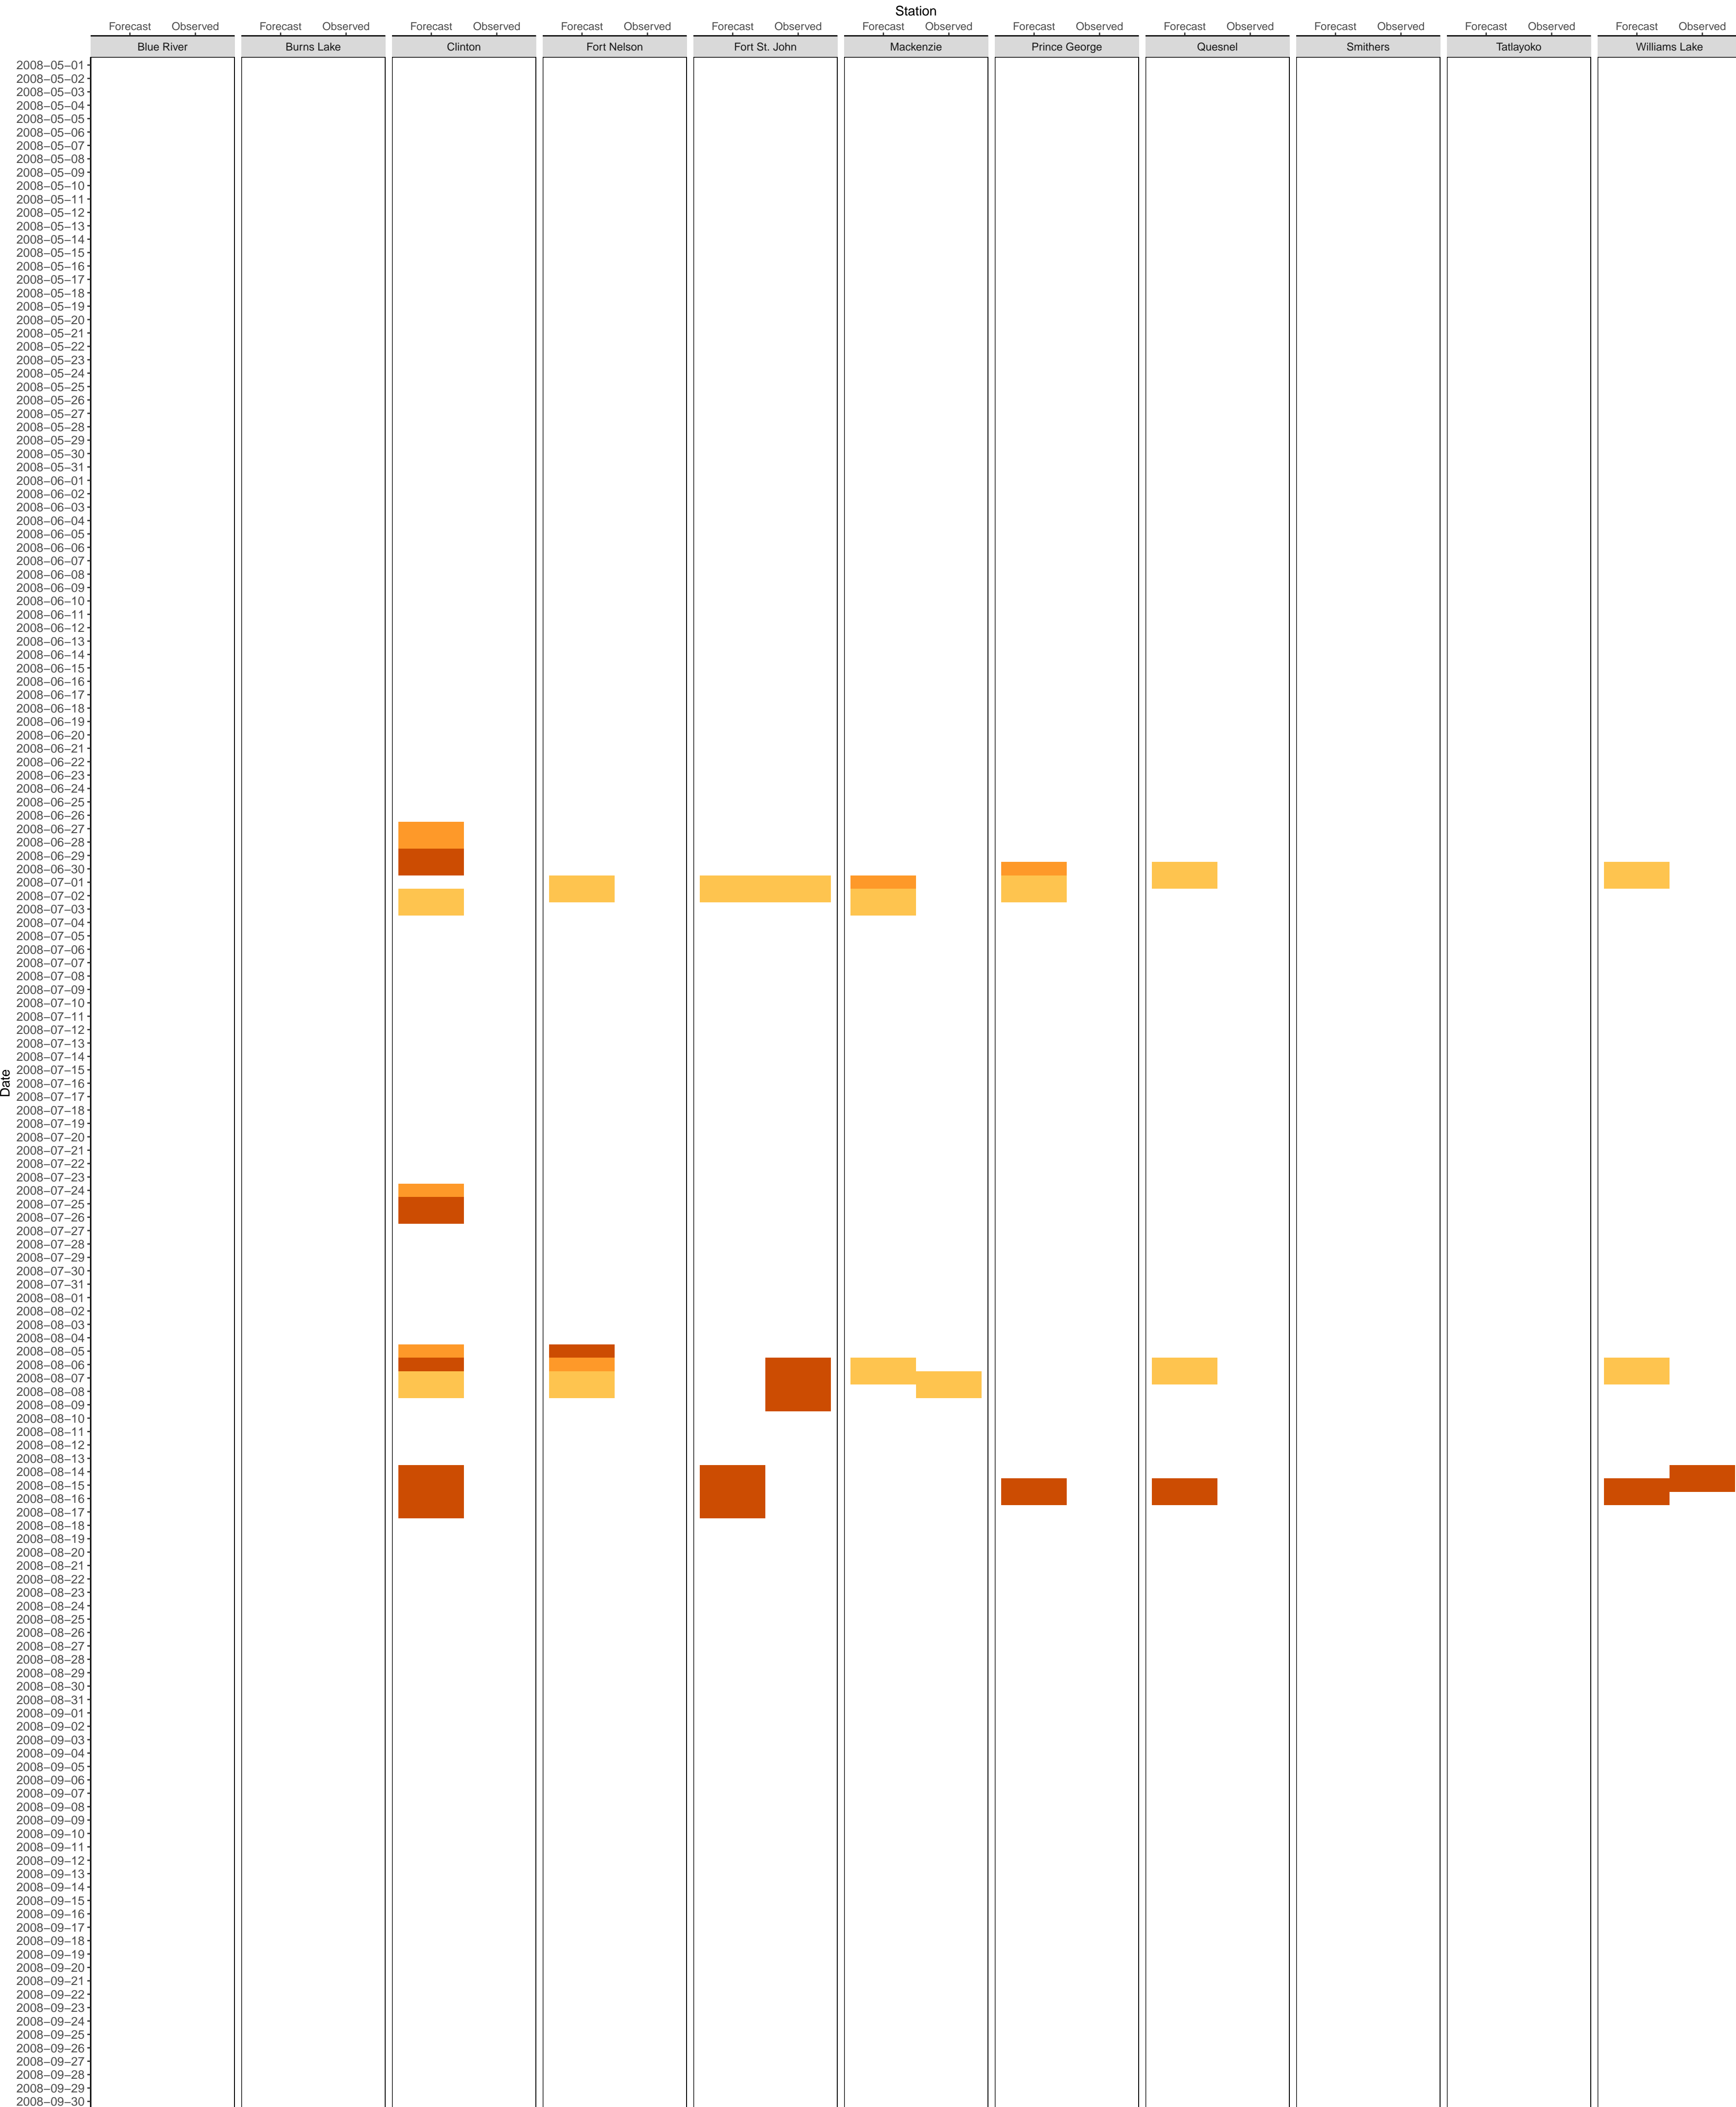



Northeast

Category:  No Alert  Category 2  Category 1  Category 0

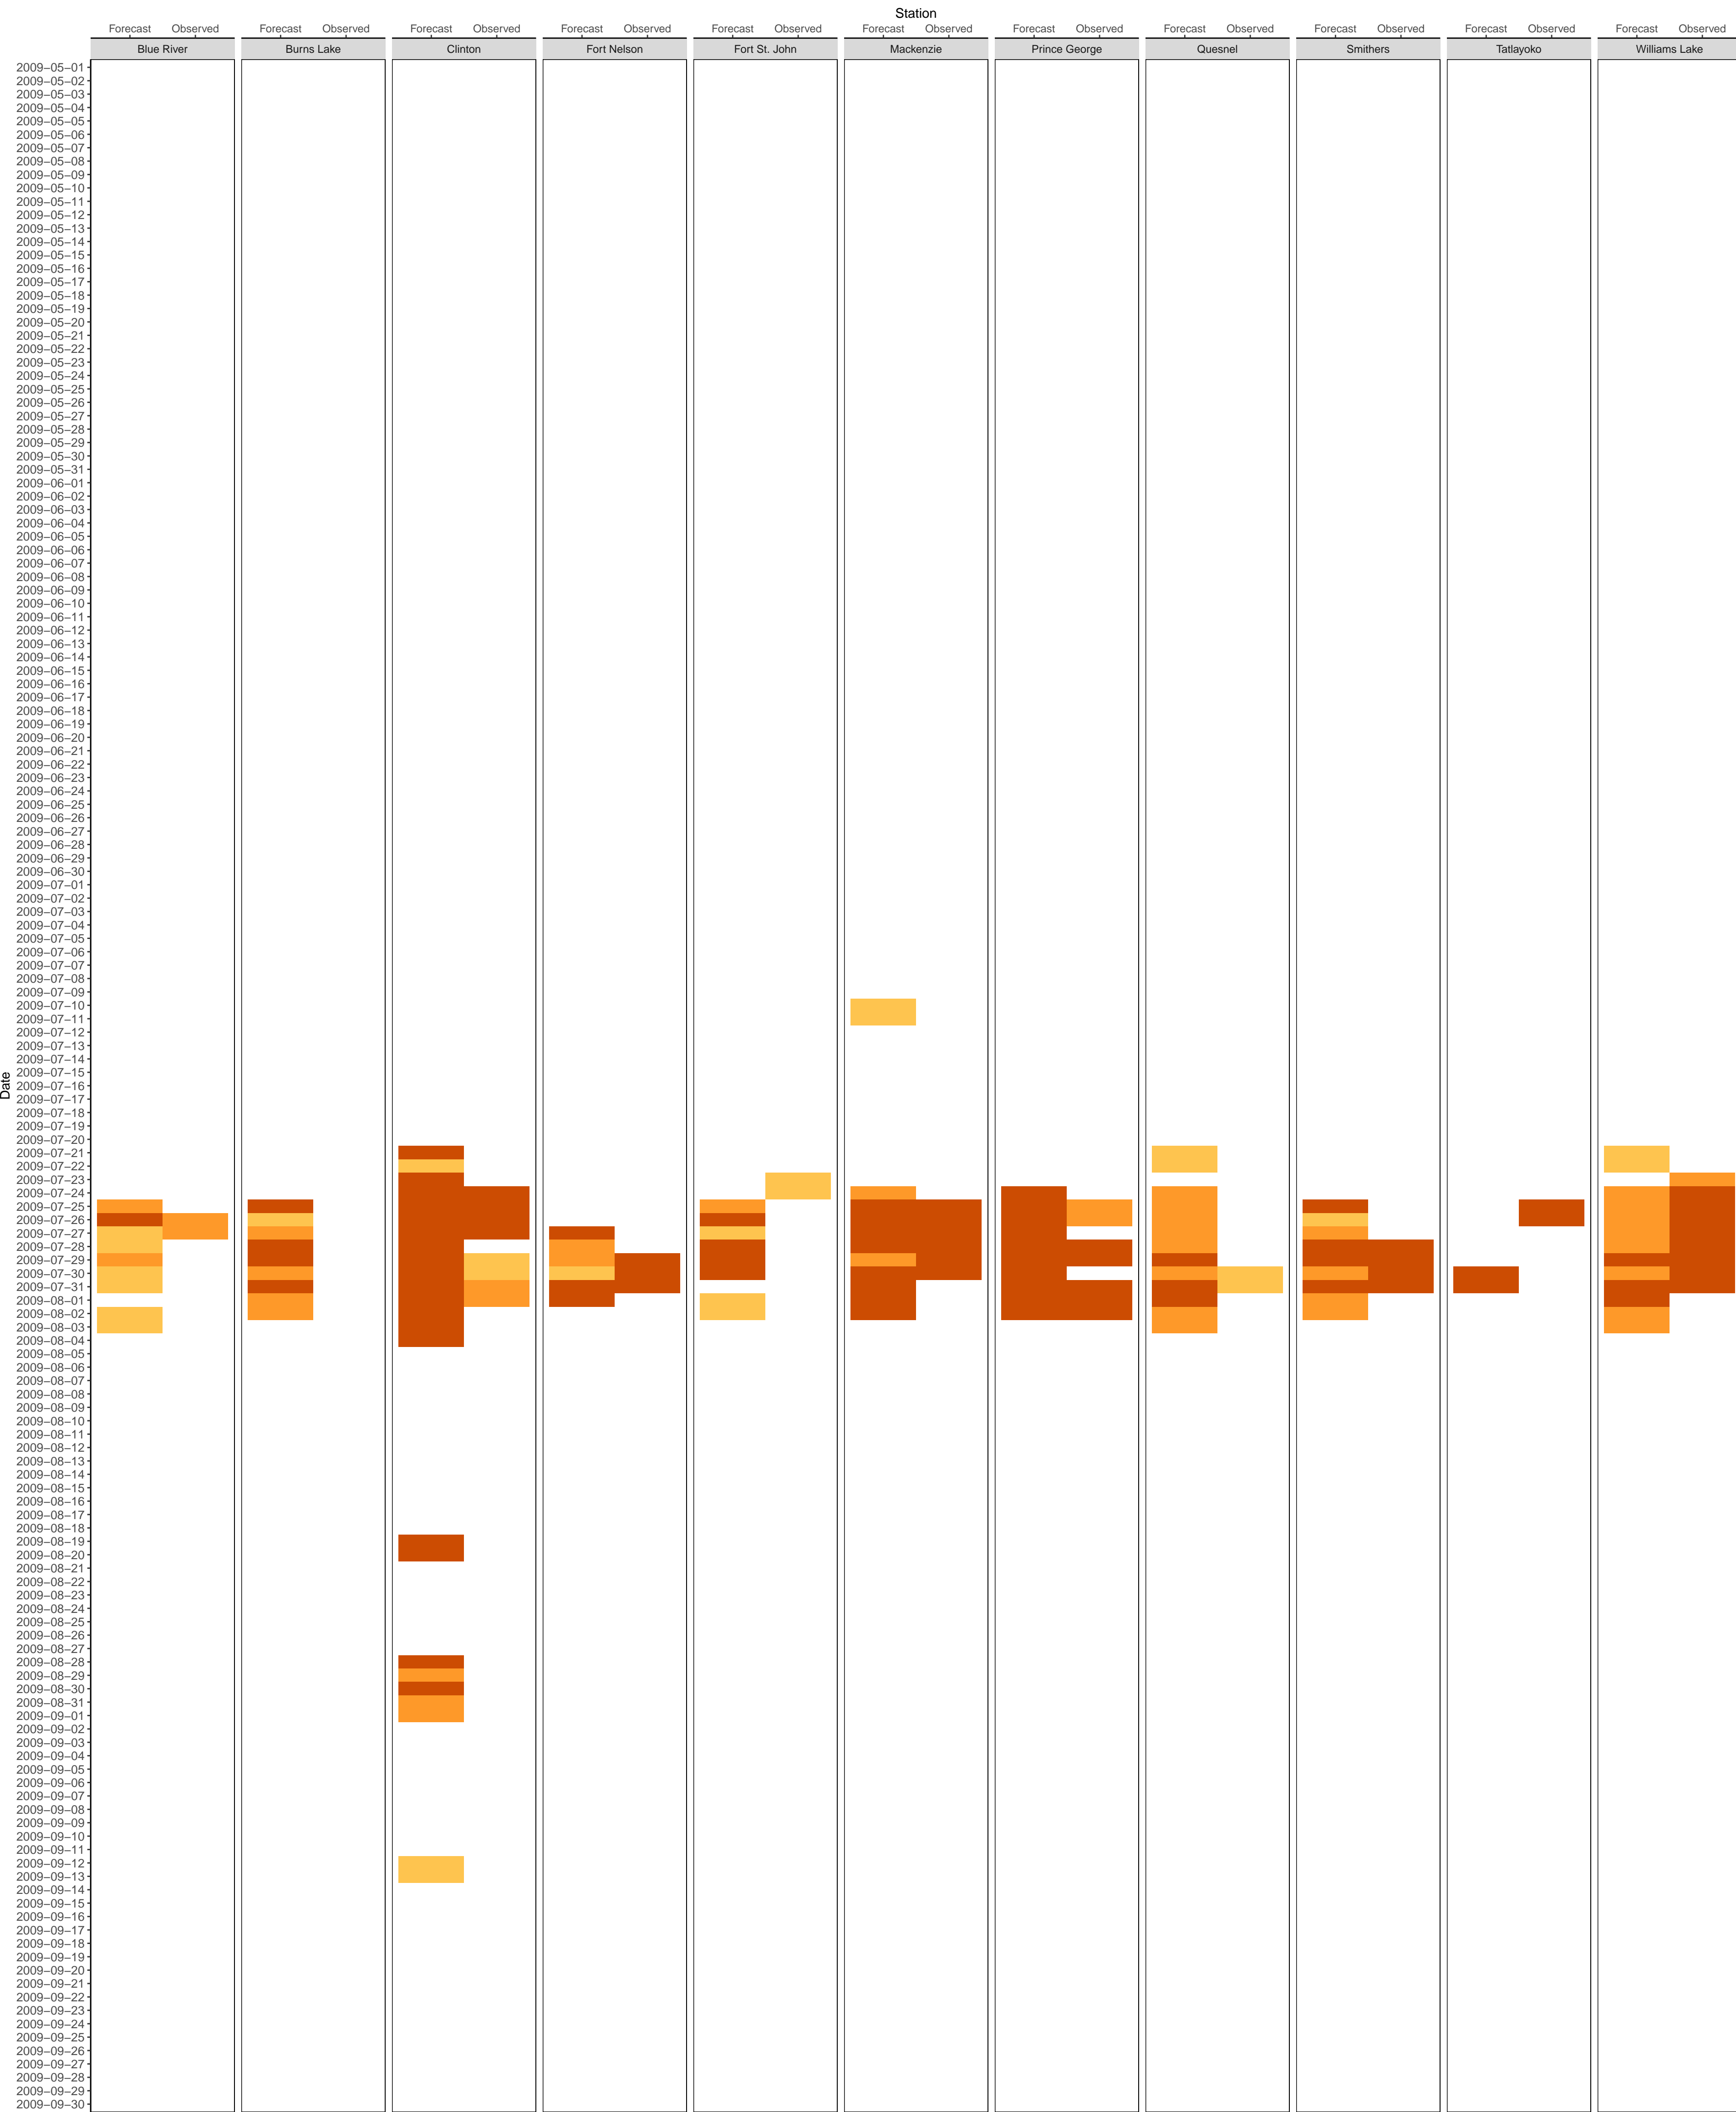

Northeast

Category: ☐ No Alert ☐ Category 2 ☐ Category 1 ☐ Category 0

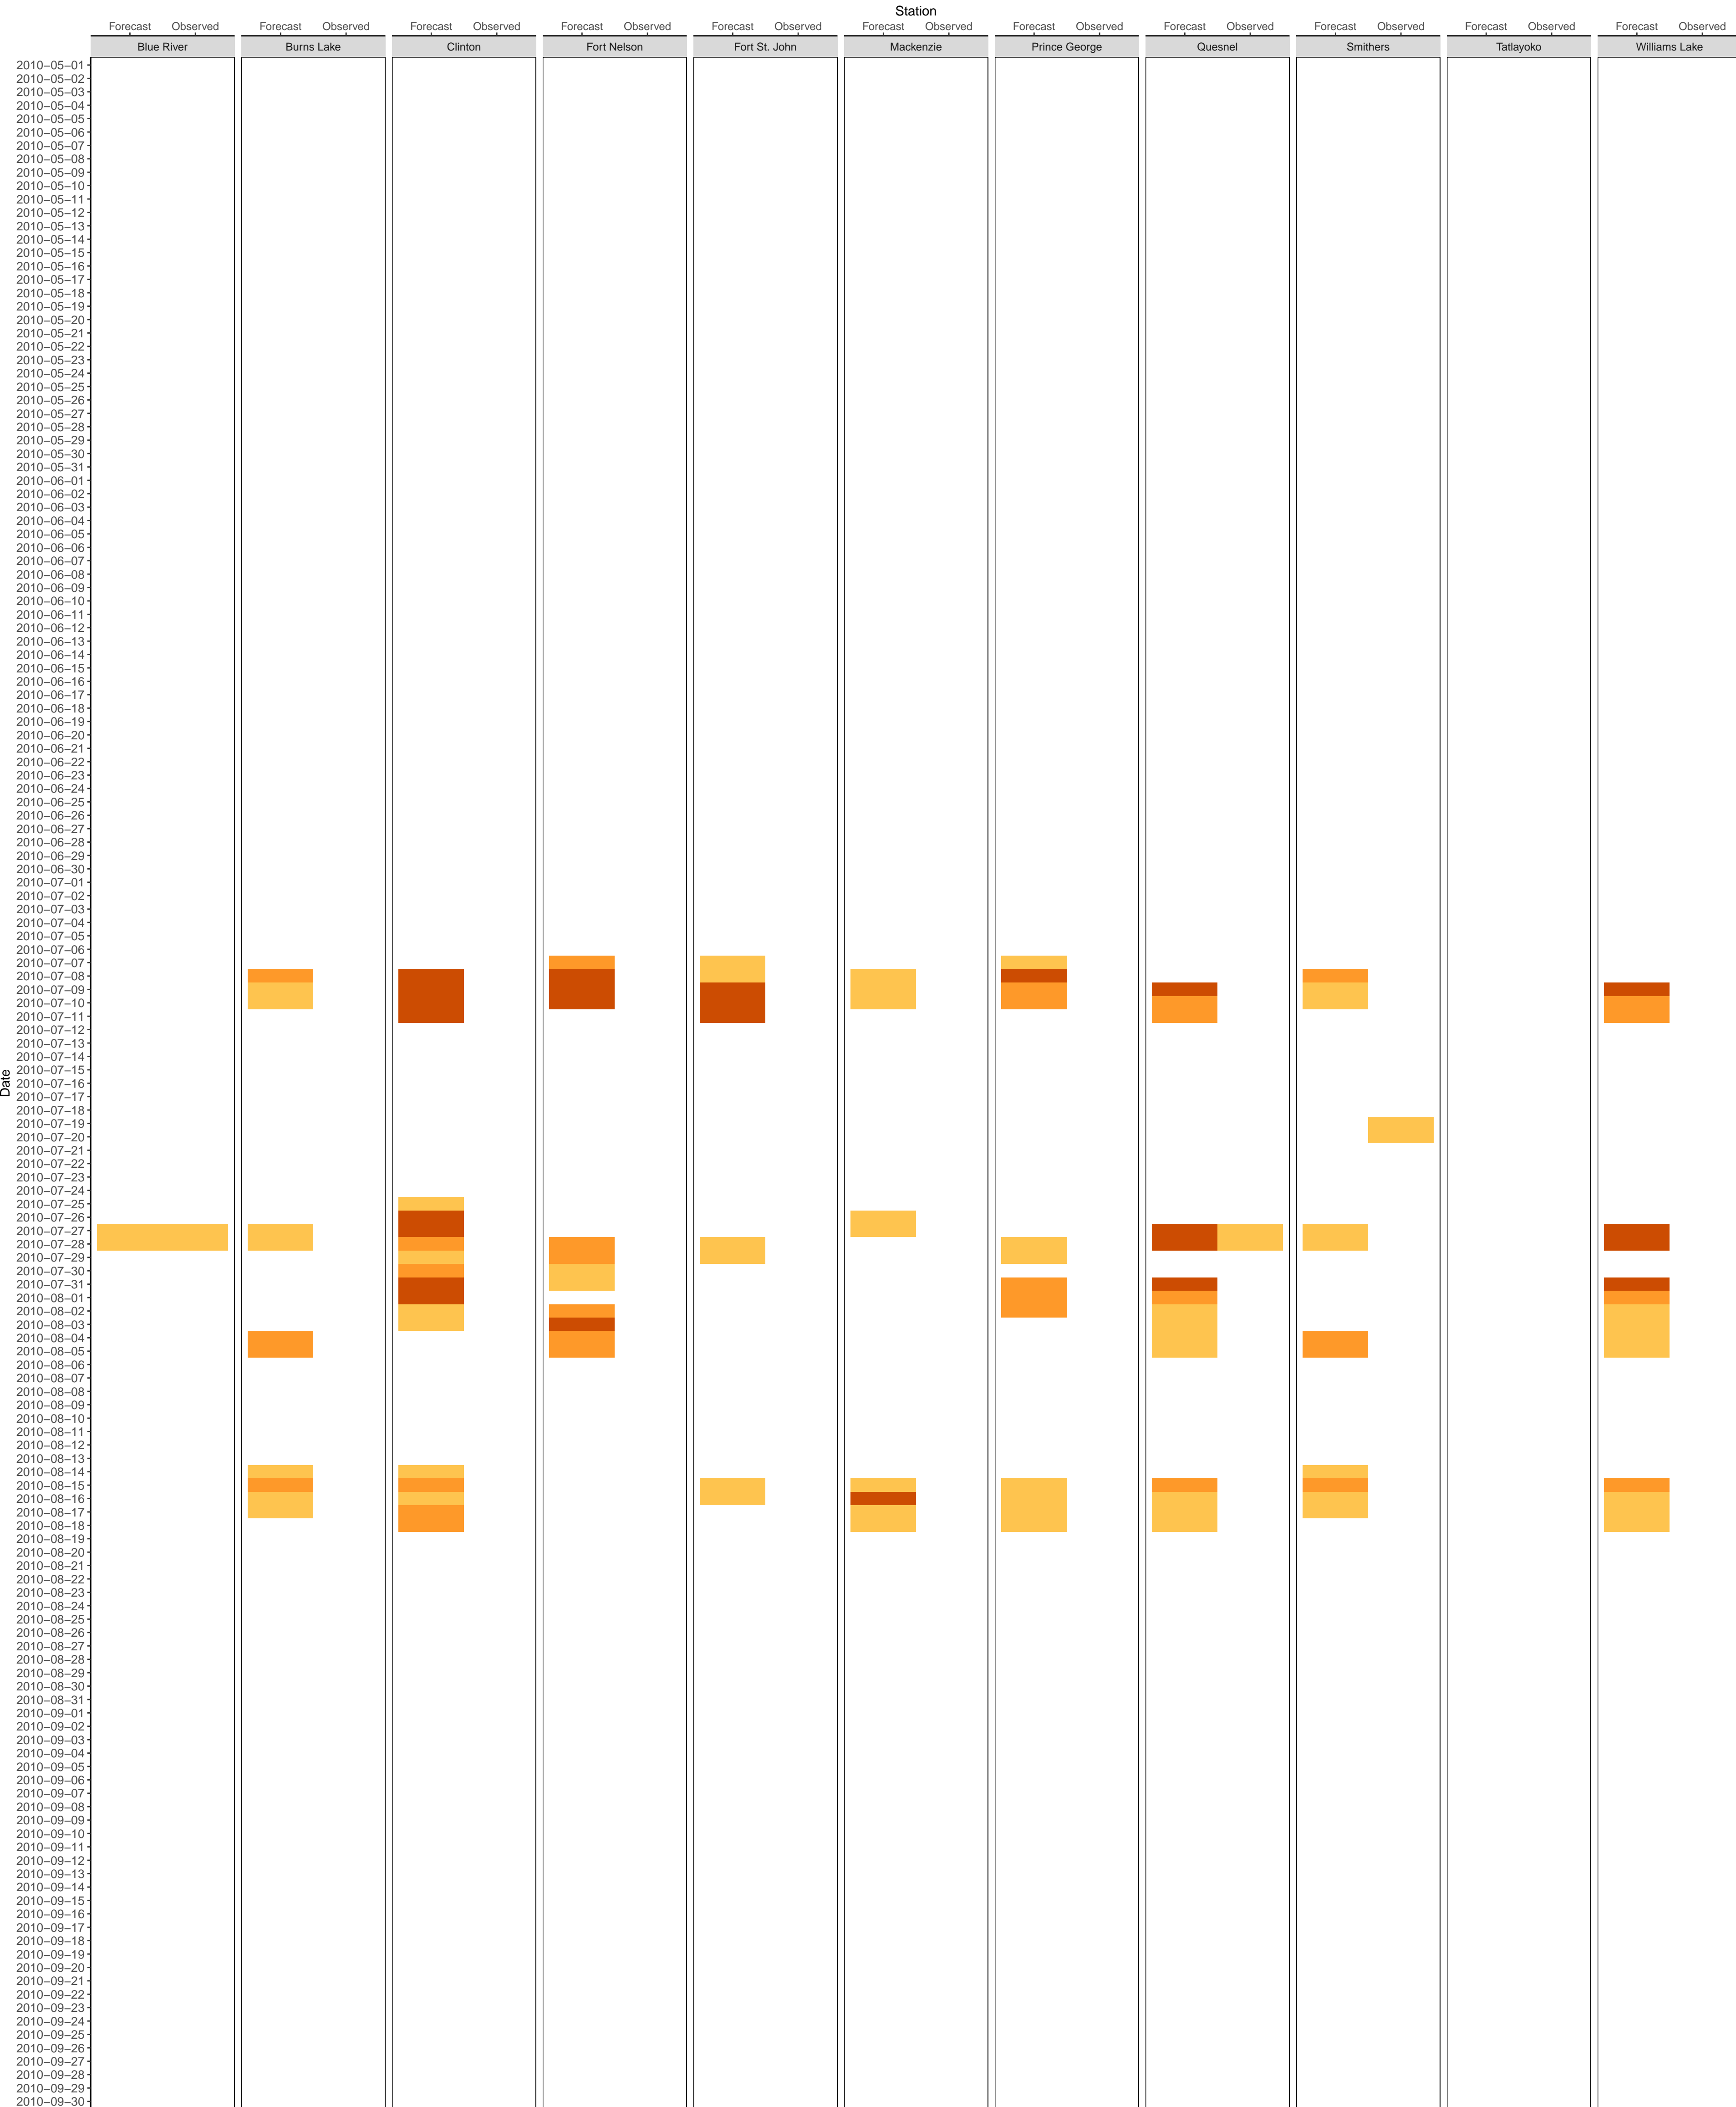

| Northeast  |            |          |            |            |            |            |             |          |               |          |           |          |               |          |          |          |          |          |           |          |               |  |
|------------|------------|----------|------------|------------|------------|------------|-------------|----------|---------------|----------|-----------|----------|---------------|----------|----------|----------|----------|----------|-----------|----------|---------------|--|
| Date       | Category:  |          | No Alert   | Category 2 | Category 1 | Category 0 |             |          |               |          |           |          |               |          |          |          |          |          |           |          |               |  |
|            |            |          |            |            |            |            | Station     |          |               |          |           |          |               |          |          |          |          |          |           |          |               |  |
|            | Forecast   | Observed | Forecast   |            | Observed   |            | Forecast    | Observed | Forecast      | Observed | Forecast  | Observed | Forecast      | Observed | Forecast | Observed | Forecast | Observed | Forecast  | Observed |               |  |
|            | Blue River |          | Burns Lake |            | Clinton    |            | Fort Nelson |          | Fort St. John |          | Mackenzie |          | Prince George |          | Quesnel  |          | Smithers |          | Tatlayoko |          | Williams Lake |  |
| 2011-05-01 |            |          |            |            |            |            |             |          |               |          |           |          |               |          |          |          |          |          |           |          |               |  |
| 2011-05-02 |            |          |            |            |            |            |             |          |               |          |           |          |               |          |          |          |          |          |           |          |               |  |
| 2011-05-03 |            |          |            |            |            |            |             |          |               |          |           |          |               |          |          |          |          |          |           |          |               |  |
| 2011-05-04 |            |          |            |            |            |            |             |          |               |          |           |          |               |          |          |          |          |          |           |          |               |  |
| 2011-05-05 |            |          |            |            |            |            |             |          |               |          |           |          |               |          |          |          |          |          |           |          |               |  |
| 2011-05-06 |            |          |            |            |            |            |             |          |               |          |           |          |               |          |          |          |          |          |           |          |               |  |
| 2011-05-07 |            |          |            |            |            |            |             |          |               |          |           |          |               |          |          |          |          |          |           |          |               |  |
| 2011-05-08 |            |          |            |            |            |            |             |          |               |          |           |          |               |          |          |          |          |          |           |          |               |  |
| 2011-05-09 |            |          |            |            |            |            |             |          |               |          |           |          |               |          |          |          |          |          |           |          |               |  |
| 2011-05-10 |            |          |            |            |            |            |             |          |               |          |           |          |               |          |          |          |          |          |           |          |               |  |
| 2011-05-11 |            |          |            |            |            |            |             |          |               |          |           |          |               |          |          |          |          |          |           |          |               |  |
| 2011-05-12 |            |          |            |            |            |            |             |          |               |          |           |          |               |          |          |          |          |          |           |          |               |  |
| 2011-05-13 |            |          |            |            |            |            |             |          |               |          |           |          |               |          |          |          |          |          |           |          |               |  |
| 2011-05-14 |            |          |            |            |            |            |             |          |               |          |           |          |               |          |          |          |          |          |           |          |               |  |
| 2011-05-15 |            |          |            |            |            |            |             |          |               |          |           |          |               |          |          |          |          |          |           |          |               |  |
| 2011-05-16 |            |          |            |            |            |            |             |          |               |          |           |          |               |          |          |          |          |          |           |          |               |  |
| 2011-05-17 |            |          |            |            |            |            |             |          |               |          |           |          |               |          |          |          |          |          |           |          |               |  |
| 2011-05-18 |            |          |            |            |            |            |             |          |               |          |           |          |               |          |          |          |          |          |           |          |               |  |
| 2011-05-19 |            |          |            |            |            |            |             |          |               |          |           |          |               |          |          |          |          |          |           |          |               |  |
| 2011-05-20 |            |          |            |            |            |            |             |          |               |          |           |          |               |          |          |          |          |          |           |          |               |  |
| 2011-05-21 |            |          |            |            |            |            |             |          |               |          |           |          |               |          |          |          |          |          |           |          |               |  |
| 2011-05-22 |            |          |            |            |            |            |             |          |               |          |           |          |               |          |          |          |          |          |           |          |               |  |
| 2011-05-23 |            |          |            |            |            |            |             |          |               |          |           |          |               |          |          |          |          |          |           |          |               |  |
| 2011-05-24 |            |          |            |            |            |            |             |          |               |          |           |          |               |          |          |          |          |          |           |          |               |  |
| 2011-05-25 |            |          |            |            |            |            |             |          |               |          |           |          |               |          |          |          |          |          |           |          |               |  |
| 2011-05-26 |            |          |            |            |            |            |             |          |               |          |           |          |               |          |          |          |          |          |           |          |               |  |
| 2011-05-27 |            |          |            |            |            |            |             |          |               |          |           |          |               |          |          |          |          |          |           |          |               |  |
| 2011-05-28 |            |          |            |            |            |            |             |          |               |          |           |          |               |          |          |          |          |          |           |          |               |  |
| 2011-05-29 |            |          |            |            |            |            |             |          |               |          |           |          |               |          |          |          |          |          |           |          |               |  |
| 2011-05-30 |            |          |            |            |            |            |             |          |               |          |           |          |               |          |          |          |          |          |           |          |               |  |
| 2011-05-31 |            |          |            |            |            |            |             |          |               |          |           |          |               |          |          |          |          |          |           |          |               |  |
| 2011-06-01 |            |          |            |            |            |            |             |          |               |          |           |          |               |          |          |          |          |          |           |          |               |  |
| 2011-06-02 |            |          |            |            |            |            |             |          |               |          |           |          |               |          |          |          |          |          |           |          |               |  |
| 2011-06-03 |            |          |            |            |            |            |             |          |               |          |           |          |               |          |          |          |          |          |           |          |               |  |
| 2011-06-04 |            |          |            |            |            |            |             |          |               |          |           |          |               |          |          |          |          |          |           |          |               |  |
| 2011-06-05 |            |          |            |            |            |            |             |          |               |          |           |          |               |          |          |          |          |          |           |          |               |  |
| 2011-06-06 |            |          |            |            |            |            |             |          |               |          |           |          |               |          |          |          |          |          |           |          |               |  |
| 2011-06-07 |            |          |            |            |            |            |             |          |               |          |           |          |               |          |          |          |          |          |           |          |               |  |
| 2011-06-08 |            |          |            |            |            |            |             |          |               |          |           |          |               |          |          |          |          |          |           |          |               |  |
| 2011-06-09 |            |          |            |            |            |            |             |          |               |          |           |          |               |          |          |          |          |          |           |          |               |  |
| 2011-06-10 |            |          |            |            |            |            |             |          |               |          |           |          |               |          |          |          |          |          |           |          |               |  |
| 2011-06-11 |            |          |            |            |            |            |             |          |               |          |           |          |               |          |          |          |          |          |           |          |               |  |
| 2011-06-12 |            |          |            |            |            |            |             |          |               |          |           |          |               |          |          |          |          |          |           |          |               |  |
| 2011-06-13 |            |          |            |            |            |            |             |          |               |          |           |          |               |          |          |          |          |          |           |          |               |  |
| 2011-06-14 |            |          |            |            |            |            |             |          |               |          |           |          |               |          |          |          |          |          |           |          |               |  |
| 2011-06-15 |            |          |            |            |            |            |             |          |               |          |           |          |               |          |          |          |          |          |           |          |               |  |
| 2011-06-16 |            |          |            |            |            |            |             |          |               |          |           |          |               |          |          |          |          |          |           |          |               |  |
| 2011-06-17 |            |          |            |            |            |            |             |          |               |          |           |          |               |          |          |          |          |          |           |          |               |  |
| 2011-06-18 |            |          |            |            |            |            |             |          |               |          |           |          |               |          |          |          |          |          |           |          |               |  |
| 2011-06-19 |            |          |            |            |            |            |             |          |               |          |           |          |               |          |          |          |          |          |           |          |               |  |
| 2011-06-20 |            |          |            |            |            |            |             |          |               |          |           |          |               |          |          |          |          |          |           |          |               |  |
| 2011-06-21 |            |          |            |            |            |            |             |          |               |          |           |          |               |          |          |          |          |          |           |          |               |  |
| 2011-06-22 |            |          |            |            |            |            |             |          |               |          |           |          |               |          |          |          |          |          |           |          |               |  |
| 2011-06-23 |            |          |            |            |            |            |             |          |               |          |           |          |               |          |          |          |          |          |           |          |               |  |
| 2011-06-24 |            |          |            |            |            |            |             |          |               |          |           |          |               |          |          |          |          |          |           |          |               |  |
| 2011-06-25 |            |          |            |            |            |            |             |          |               |          |           |          |               |          |          |          |          |          |           |          |               |  |
| 2011-06-26 |            |          |            |            |            |            |             |          |               |          |           |          |               |          |          |          |          |          |           |          |               |  |
| 2011-06-27 |            |          |            |            |            |            |             |          |               |          |           |          |               |          |          |          |          |          |           |          |               |  |
| 2011-06-28 |            |          |            |            |            |            |             |          |               |          |           |          |               |          |          |          |          |          |           |          |               |  |
| 2011-06-29 |            |          |            |            |            |            |             |          |               |          |           |          |               |          |          |          |          |          |           |          |               |  |



Northeast

Category:  No Alert  Category 2  Category 1  Category 0

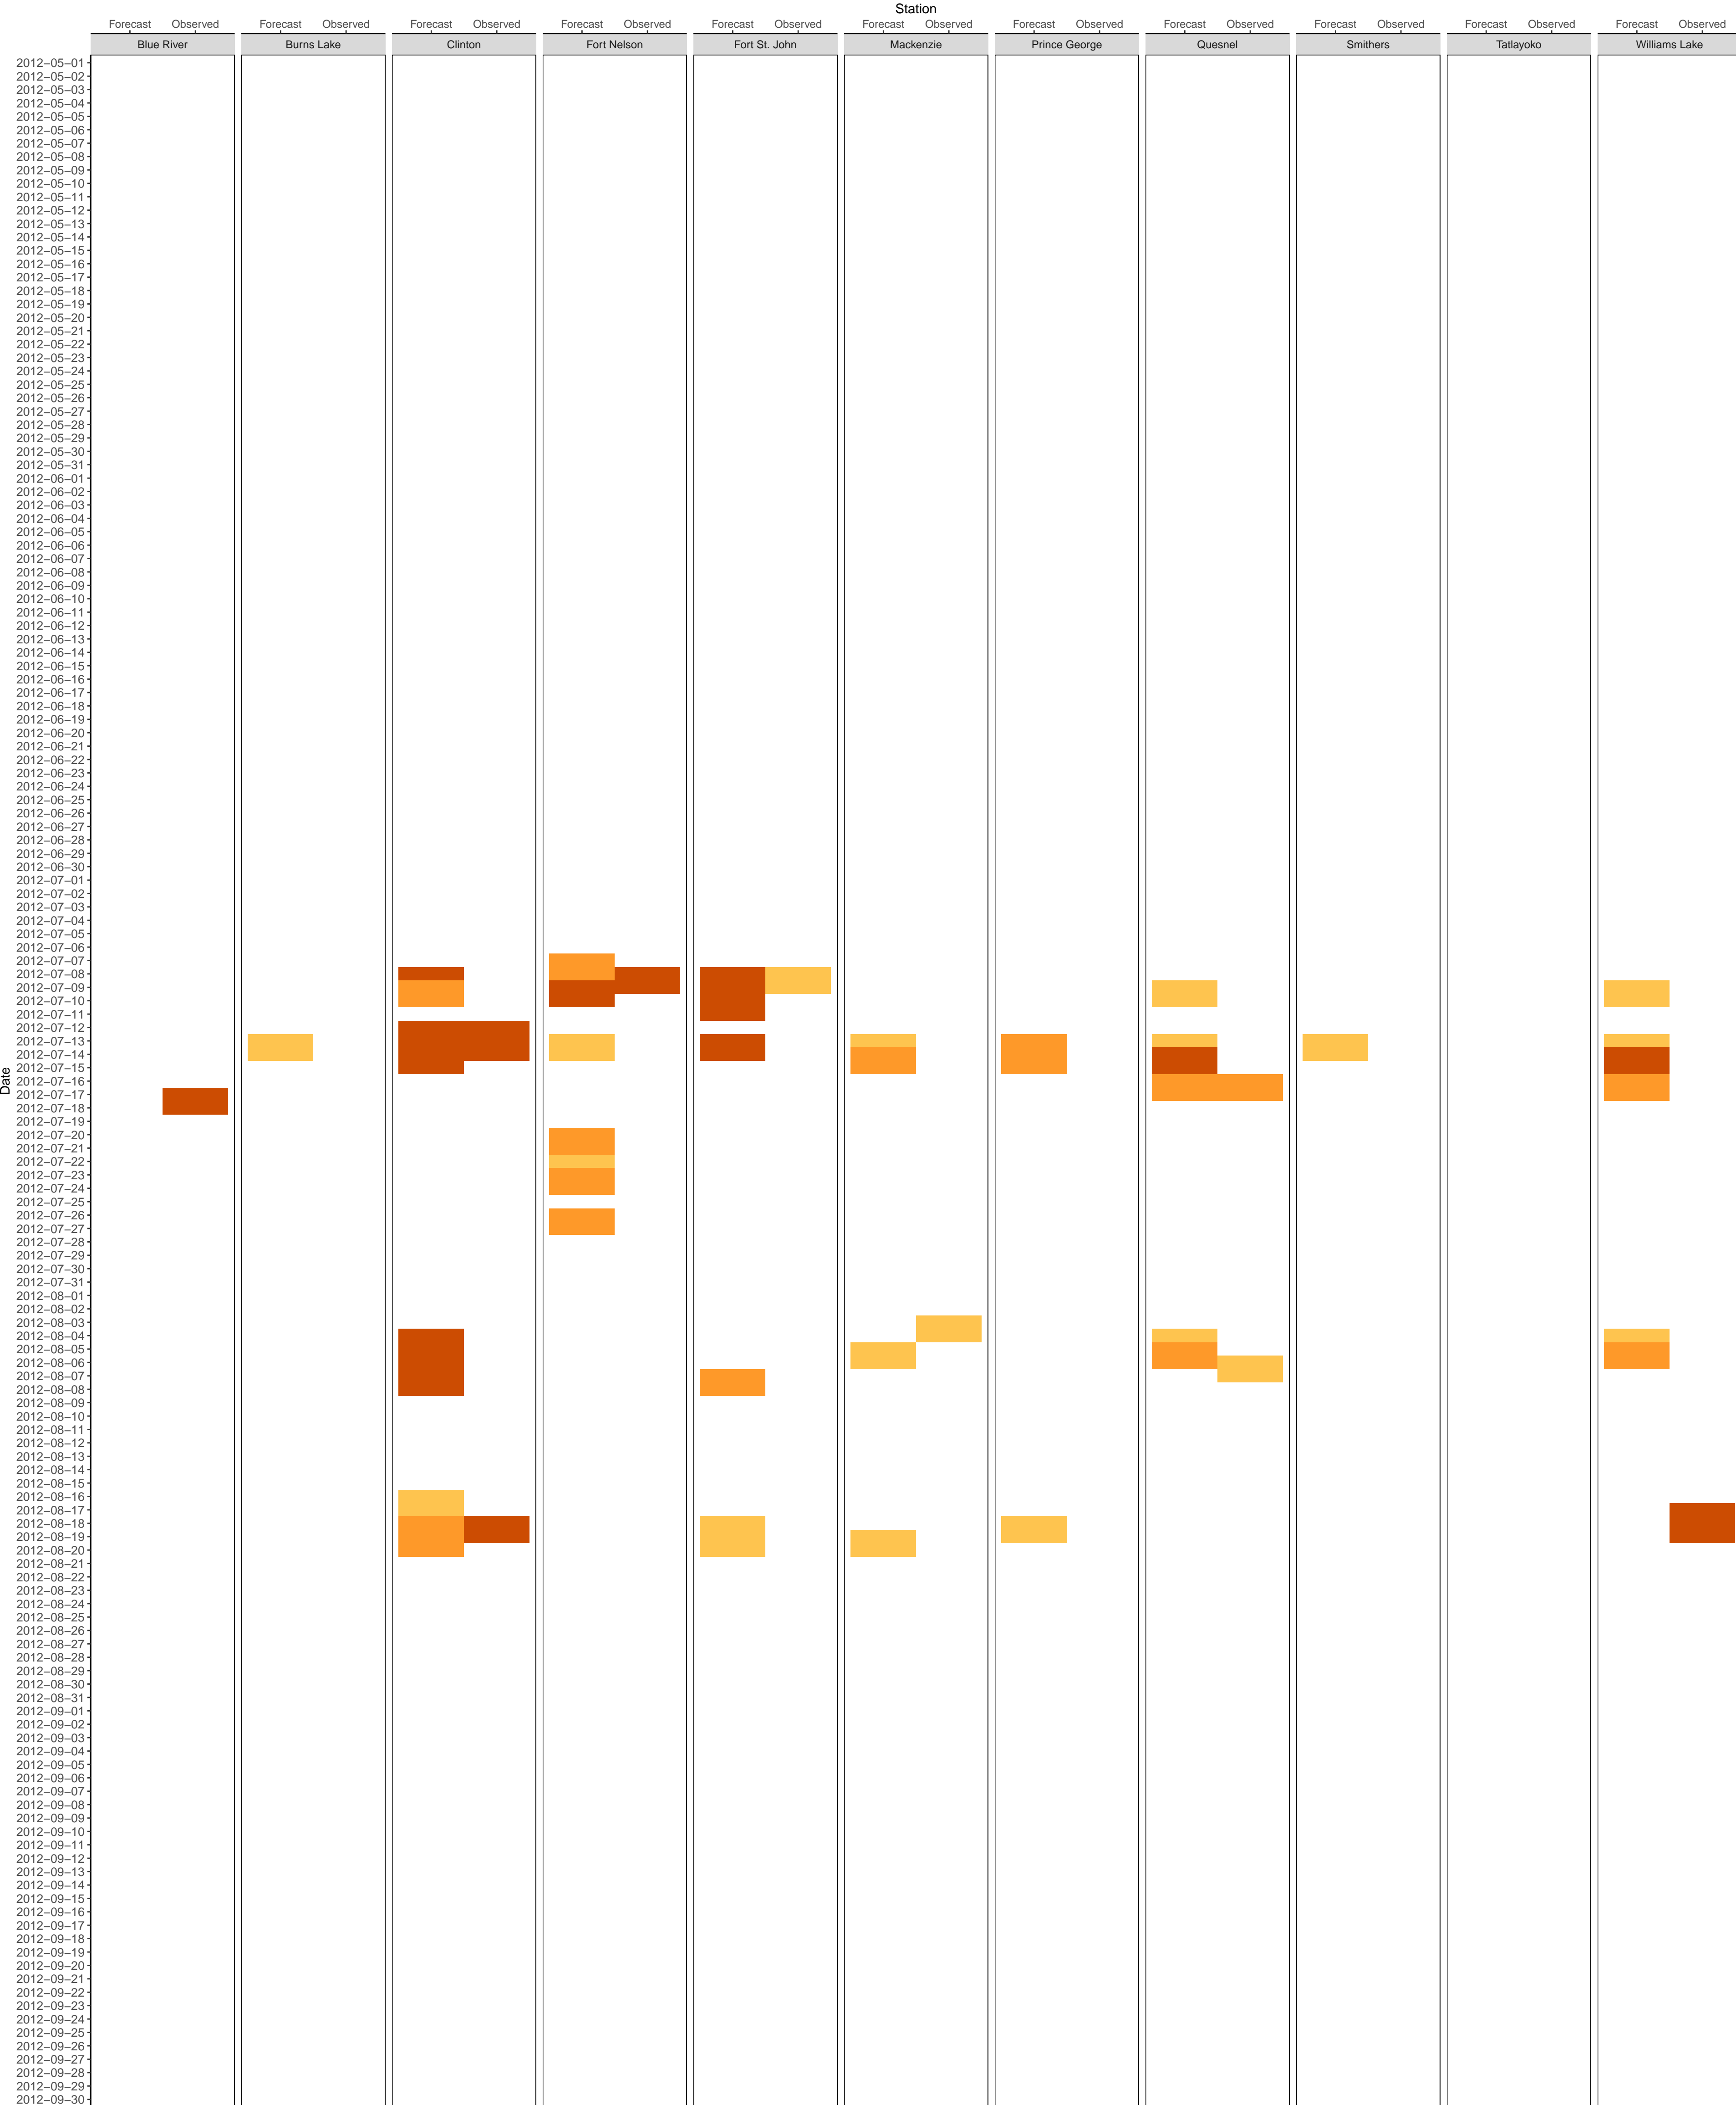

Northeast

Category:  No Alert  Category 2  Category 1  Category 0

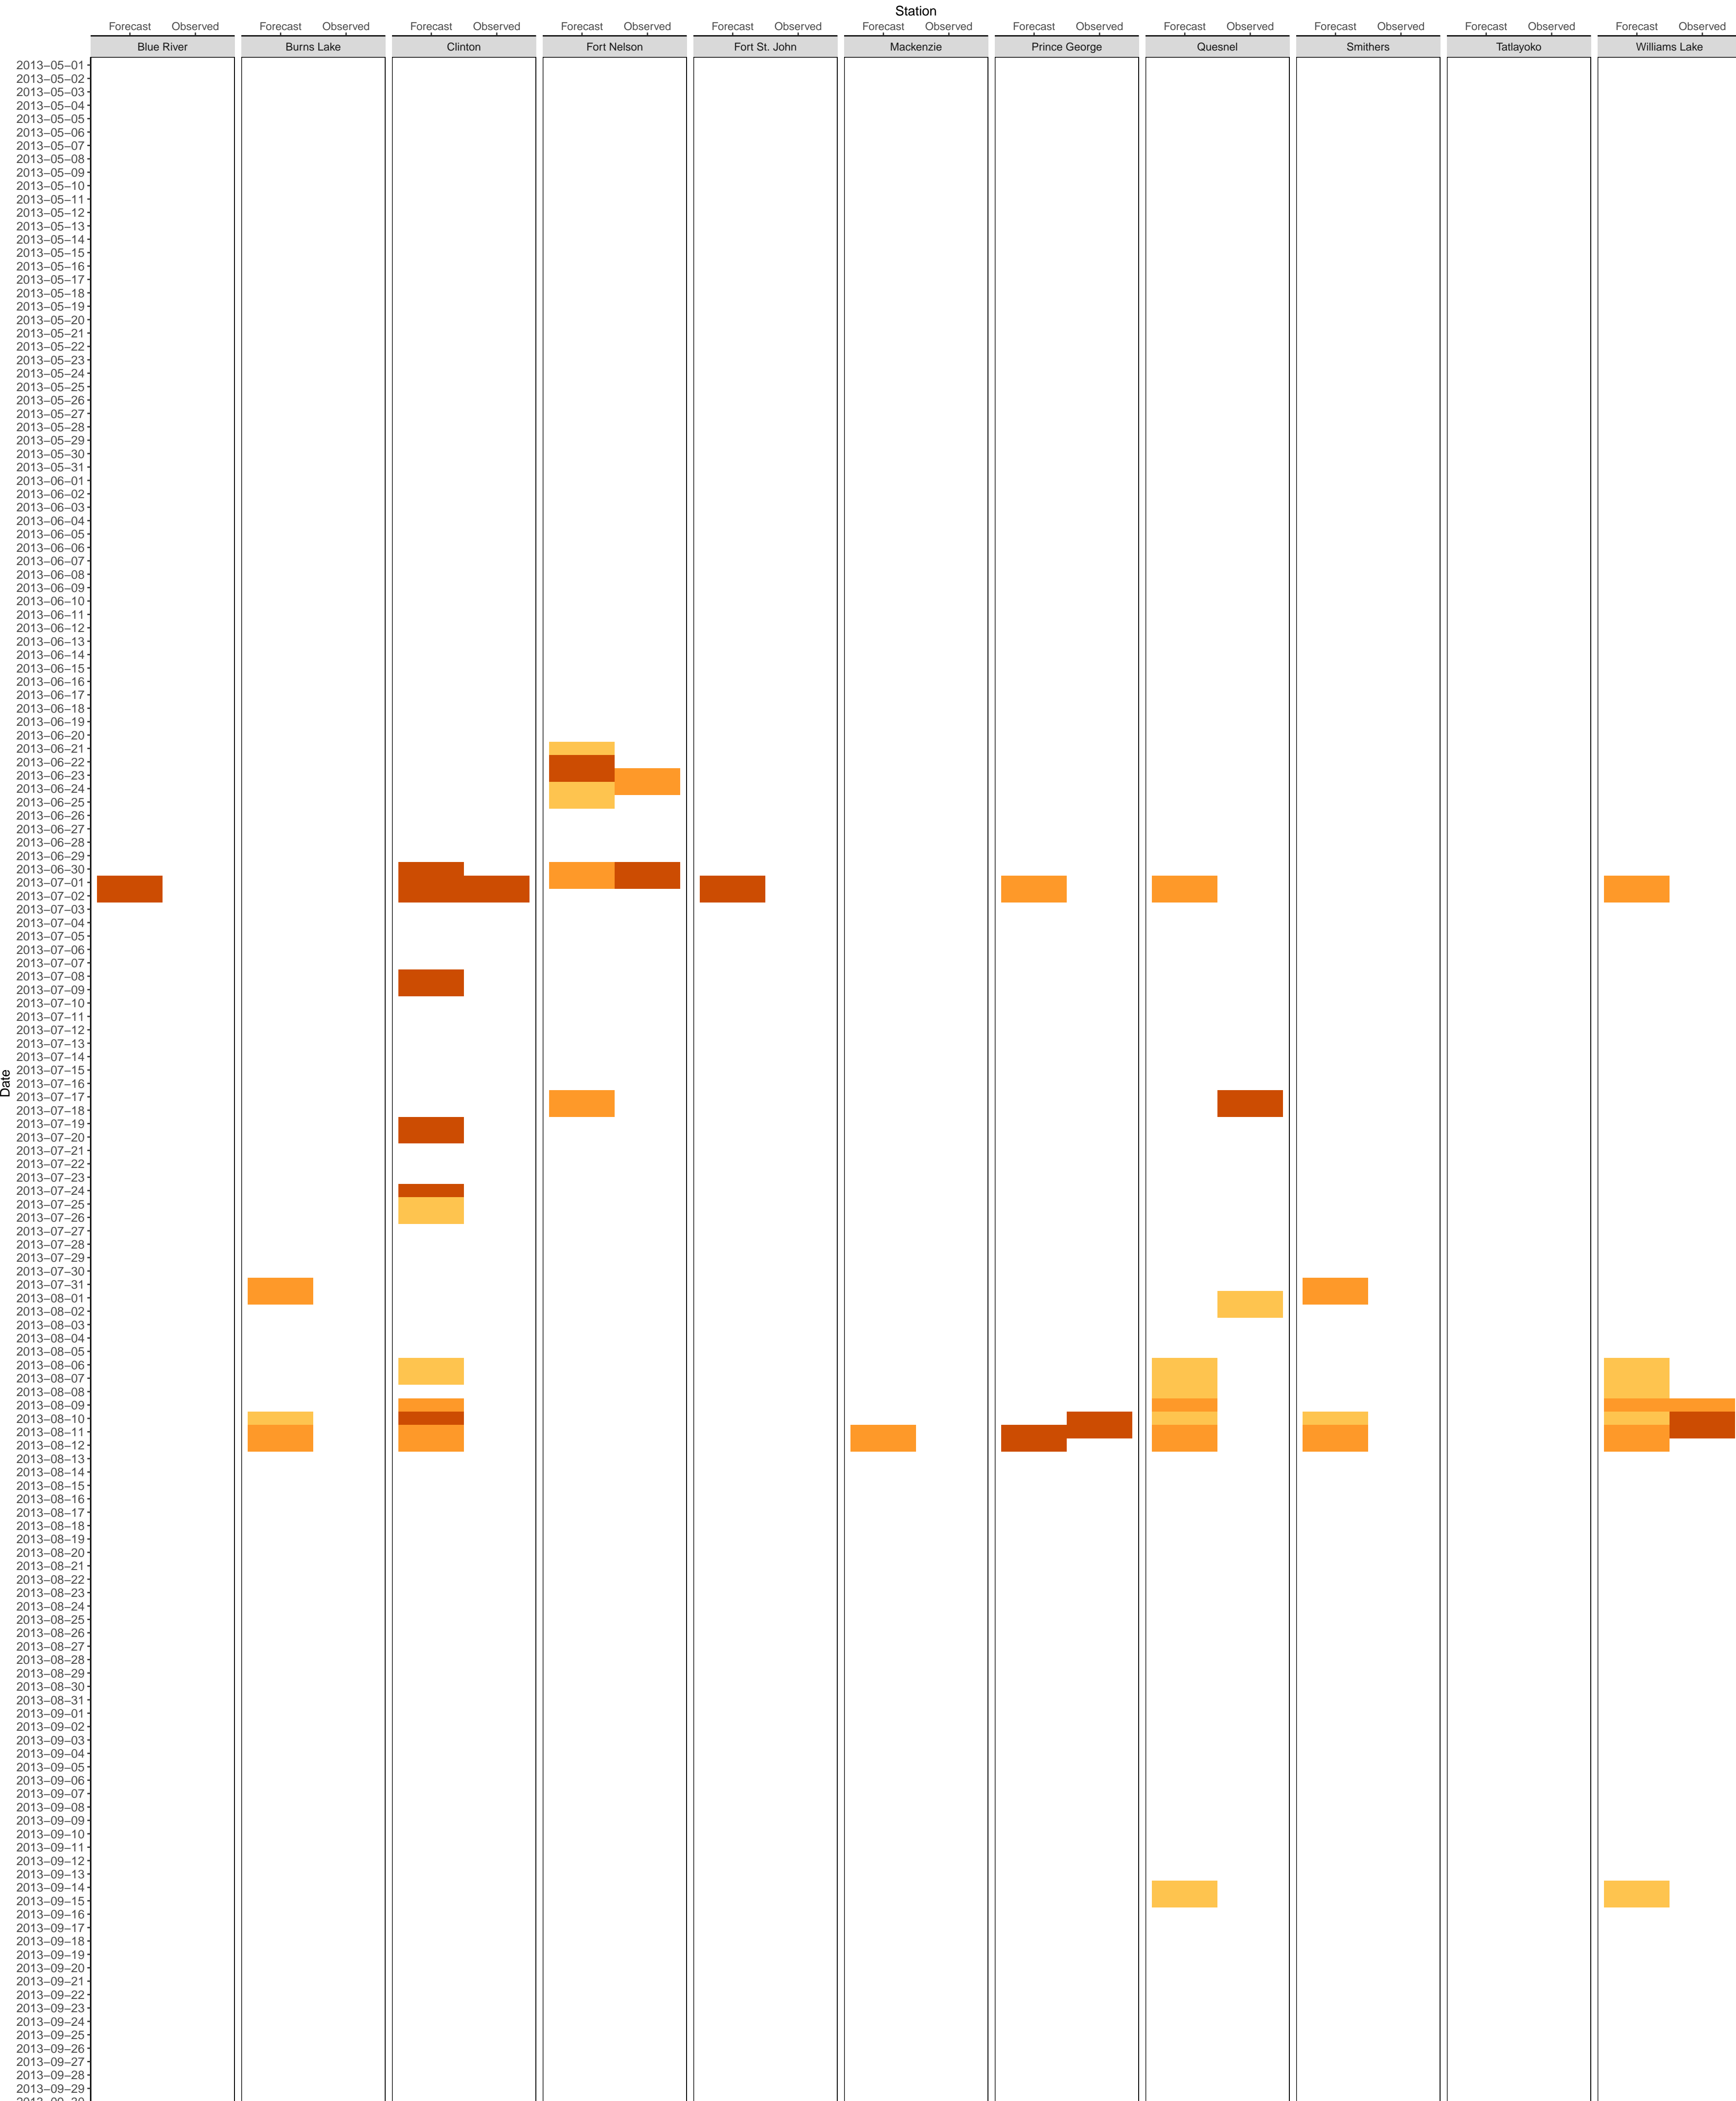

Northeast

Category:  No Alert  Category 2  Category 1  Category 0

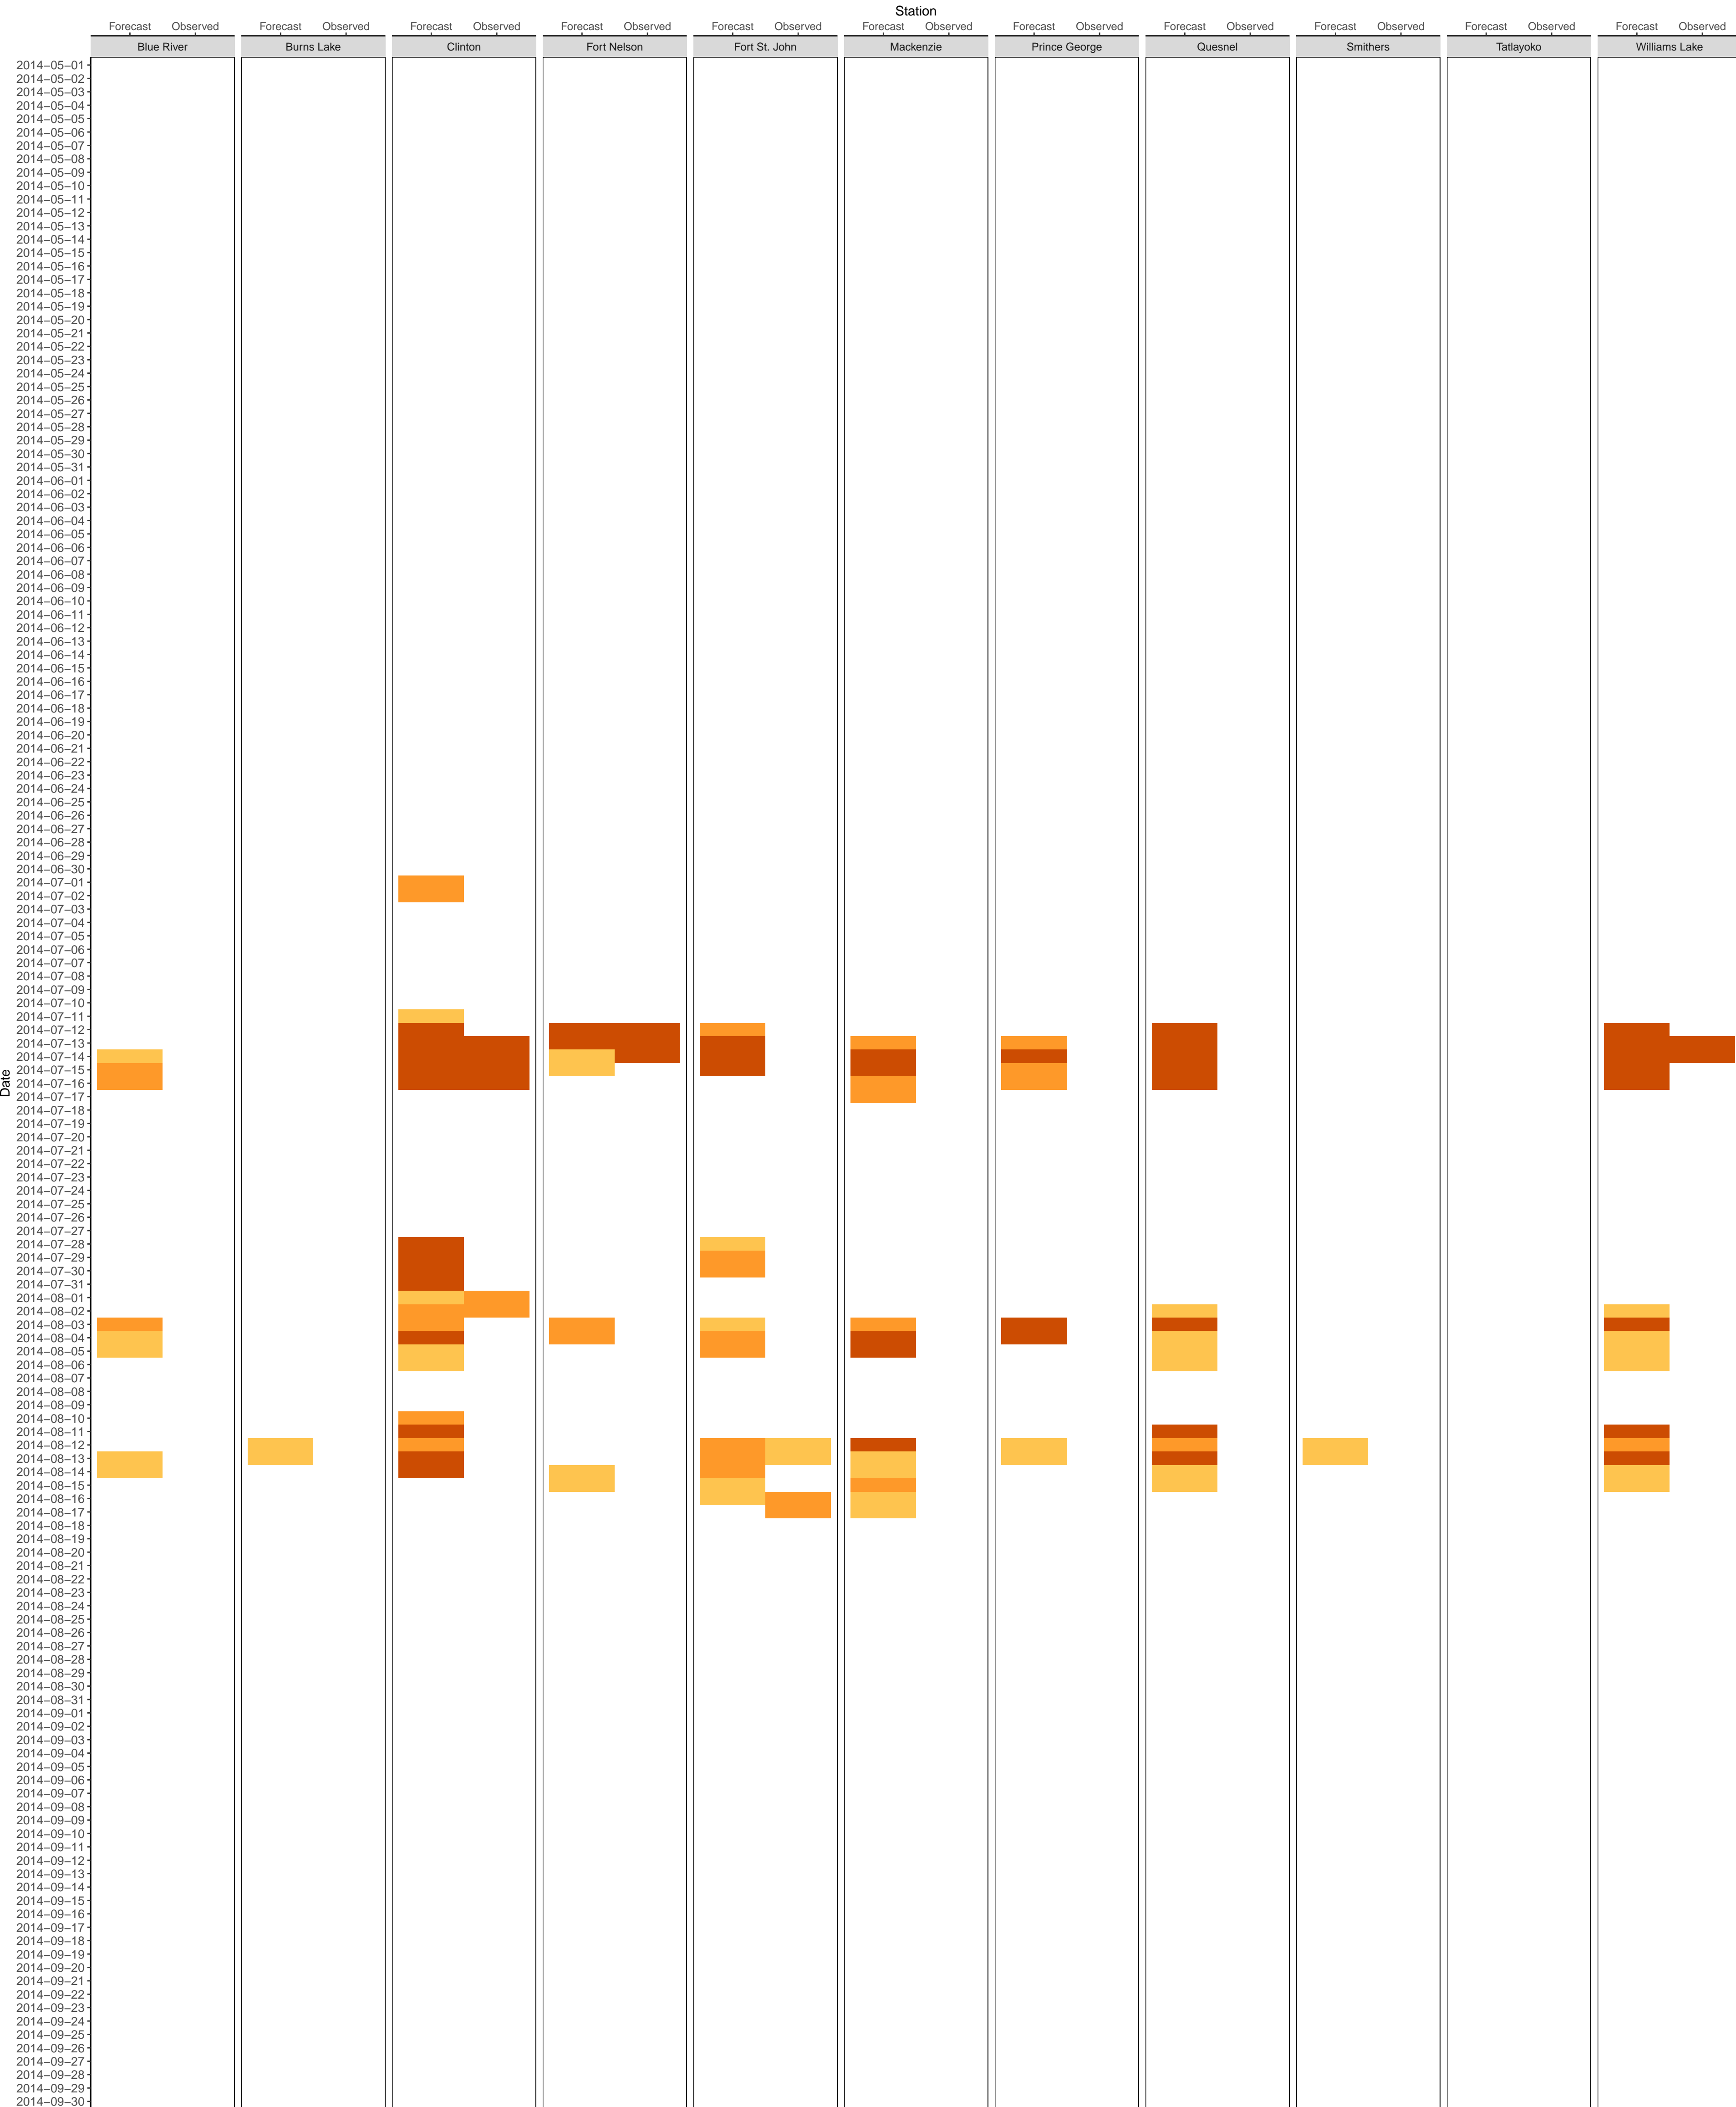

Northeast

Category:  No Alert  Category 2  Category 1  Category 0

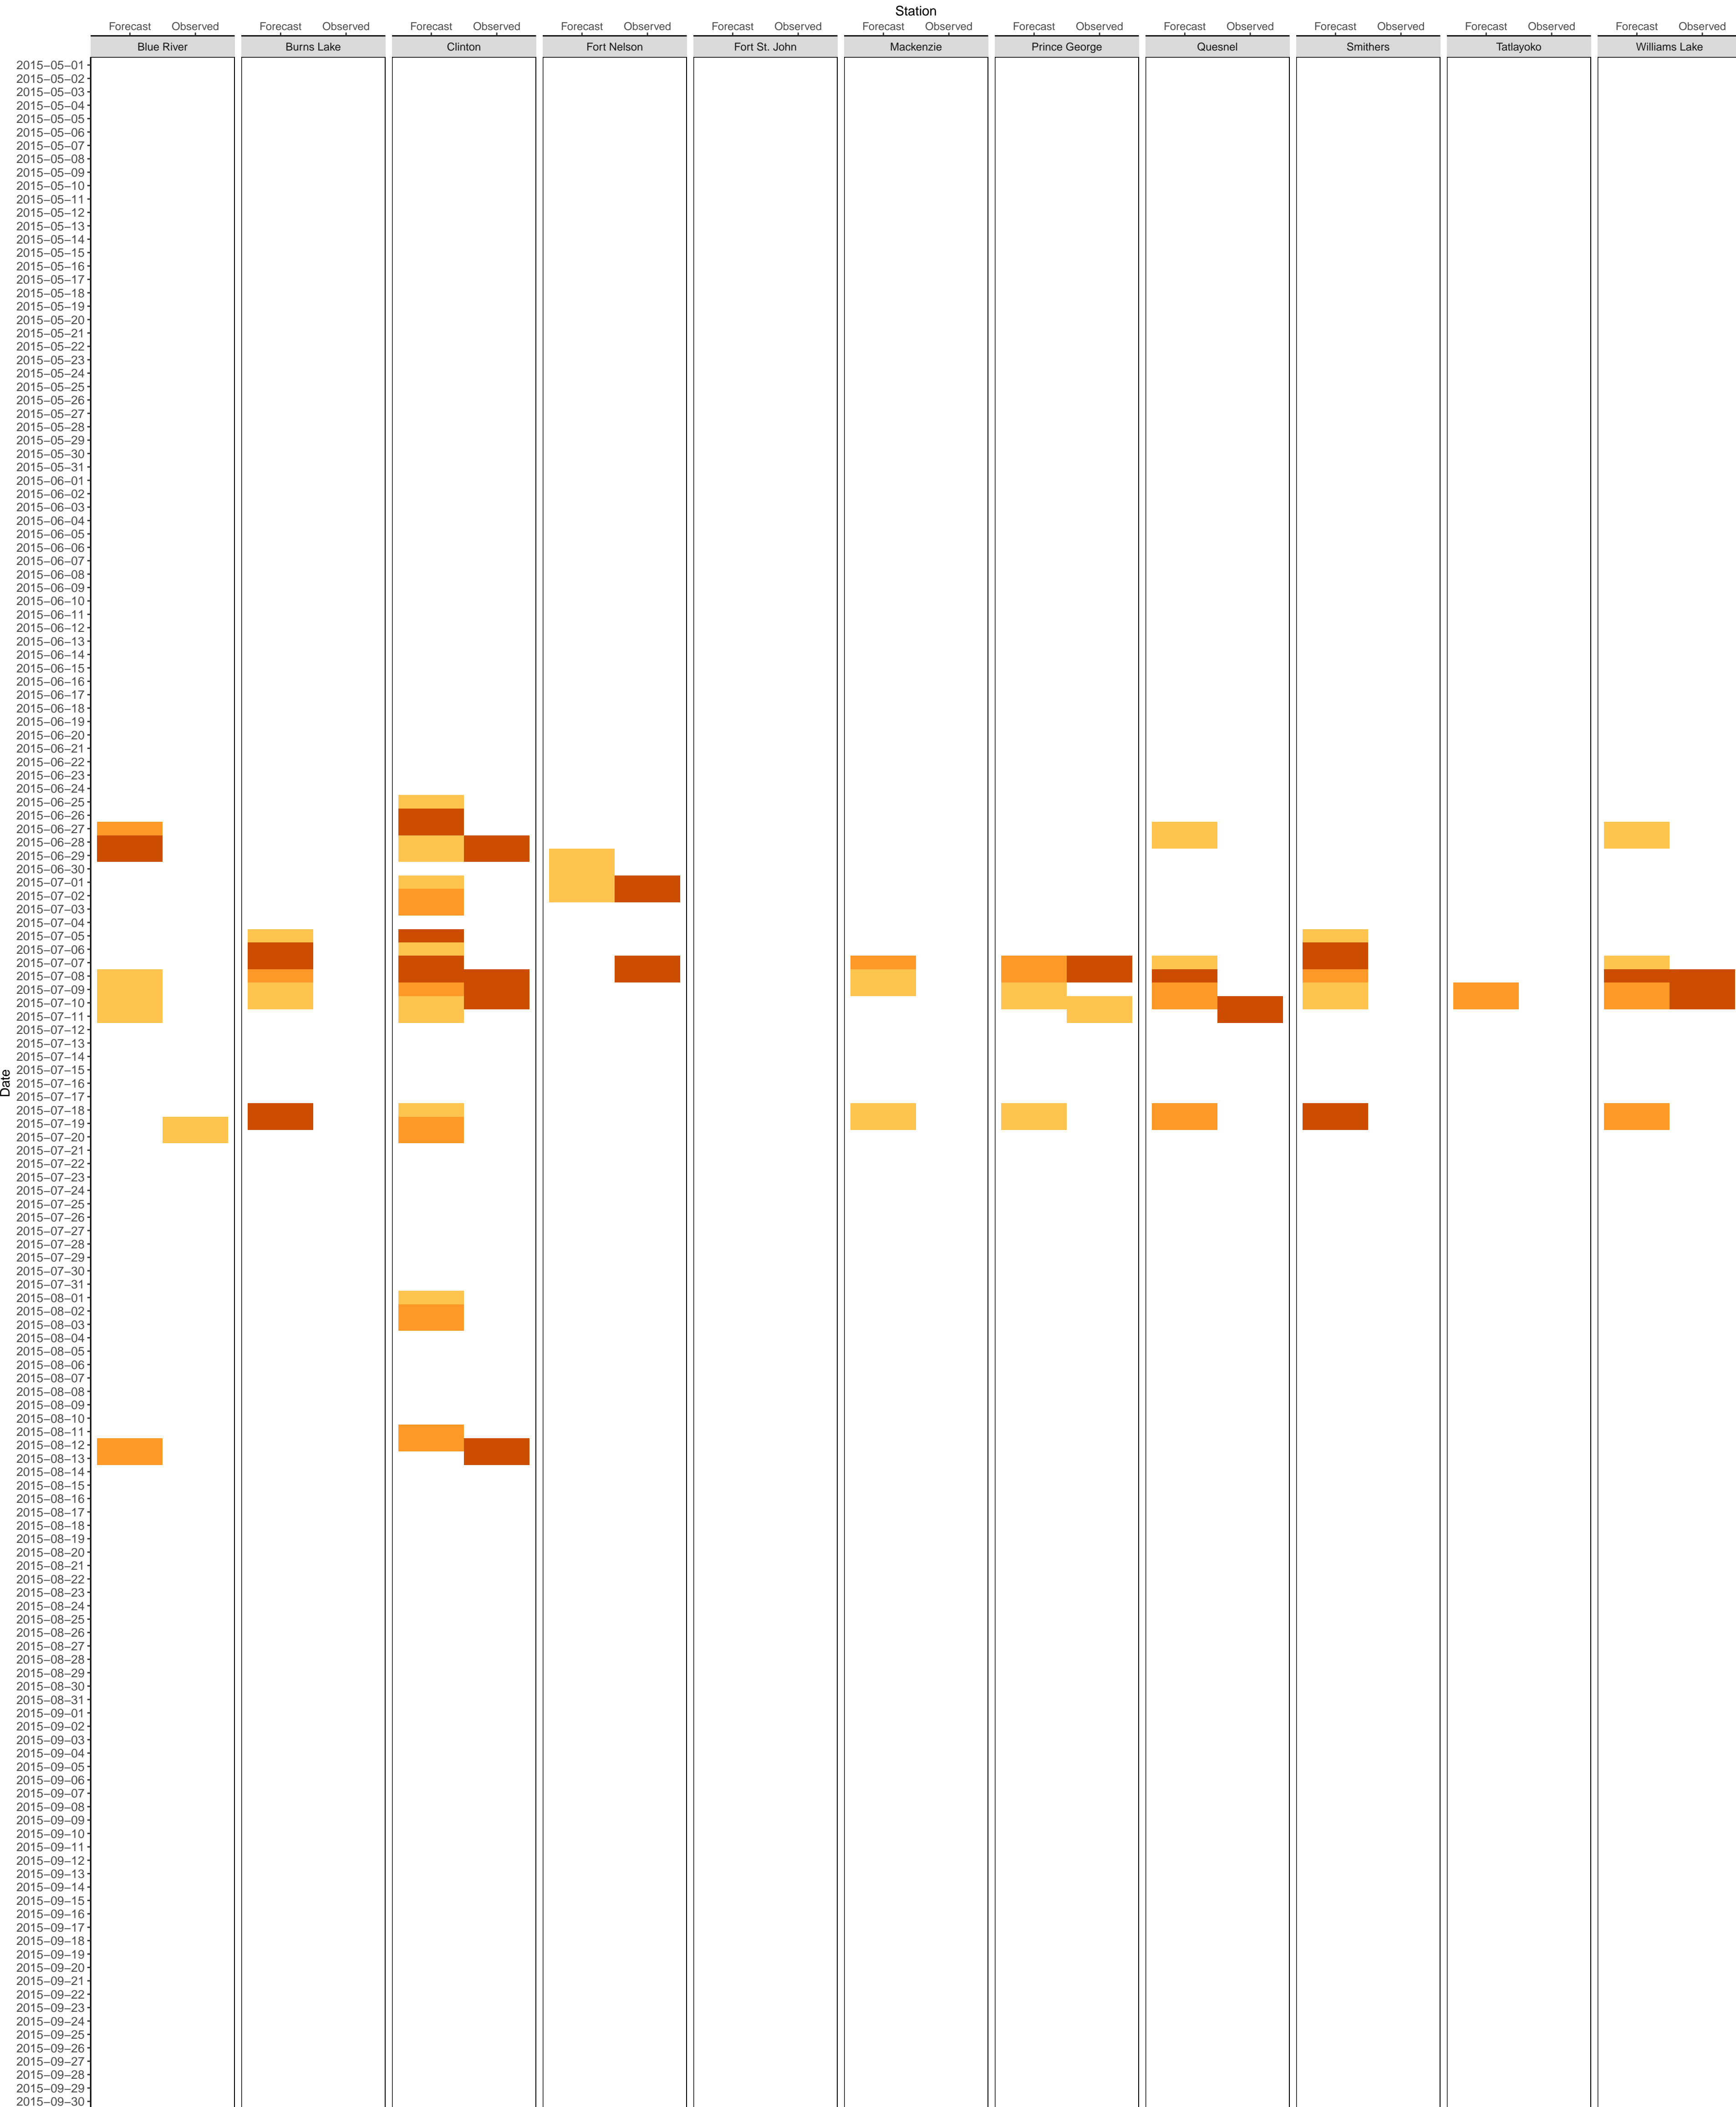

Northeast

Category:  No Alert  Category 2  Category 1  Category 0

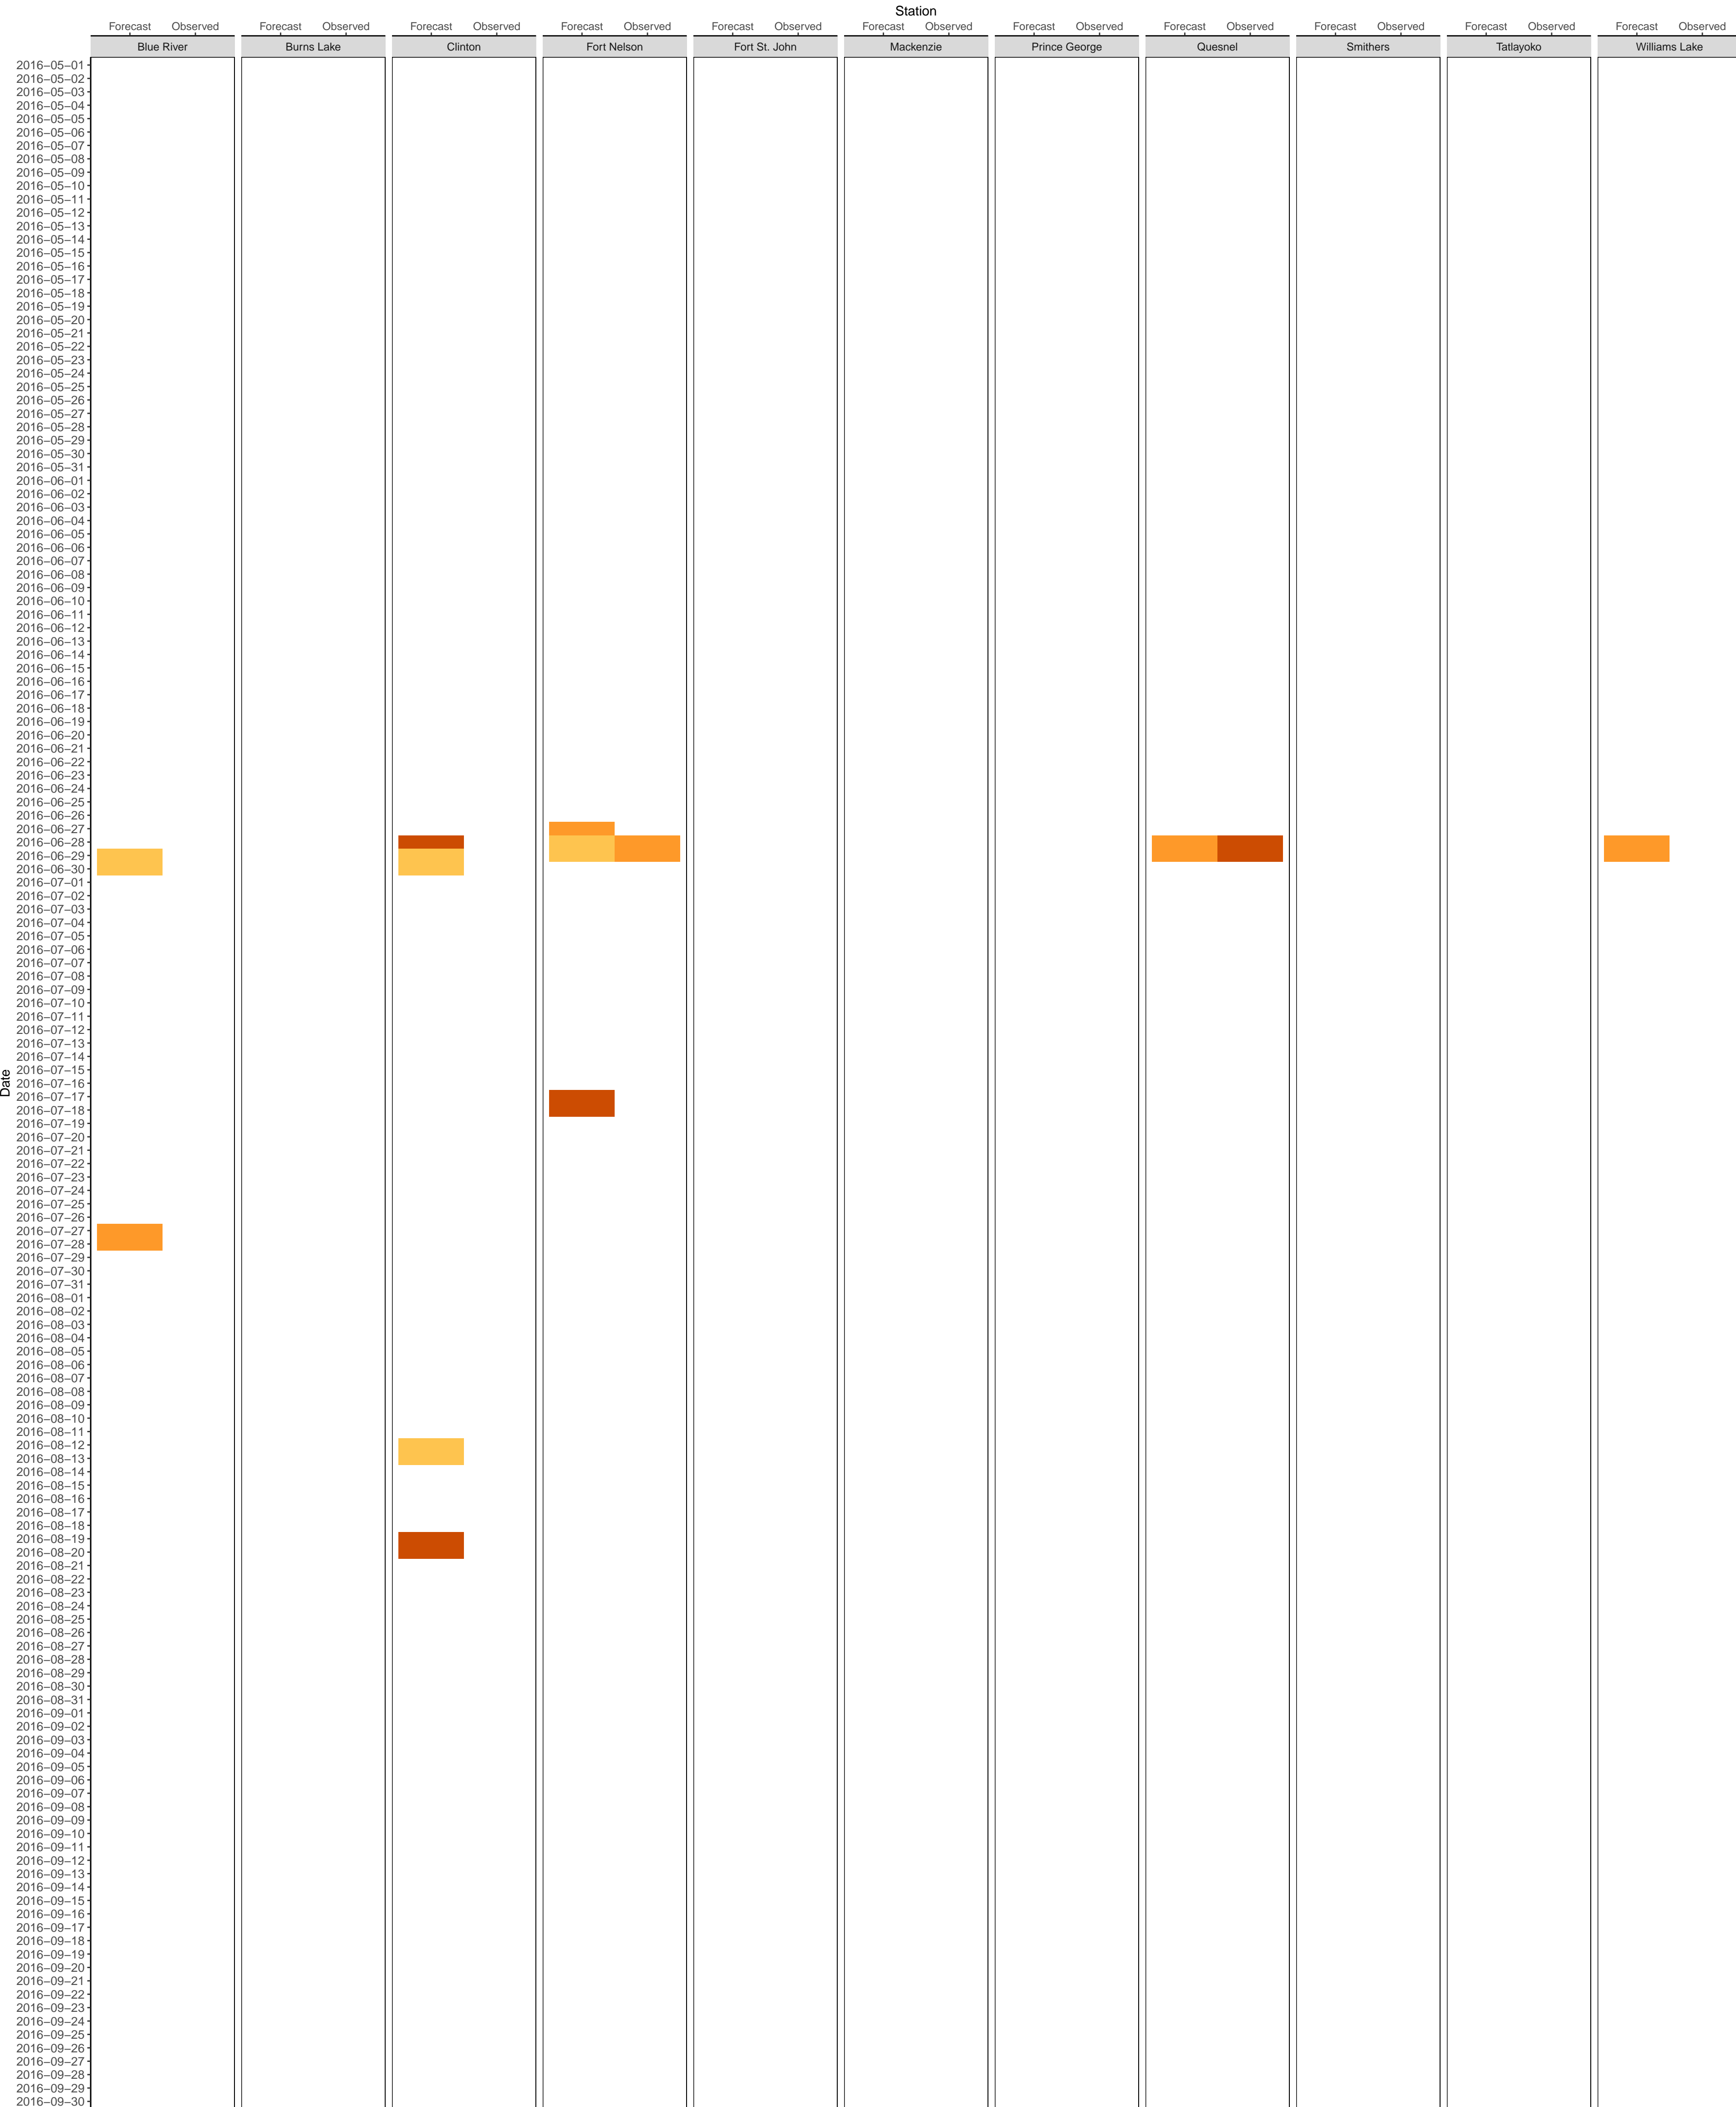

Supplement: s1 [file s1]
