# Supplementary material for: Establishing Heat Alert Thresholds for the Varied Climatic Regions of British Columbia, Canada
Source: MDPI journal article supplement (doi:10.3390/ijerph15092048), 2018-09-19
Supplement: s1 [file s1]

## Northwest

Category:  No Alert  Category 2  Category 1  Category 0

|            | Station    |          |            |          |               |          |          |          |          |          |             |          |
|------------|------------|----------|------------|----------|---------------|----------|----------|----------|----------|----------|-------------|----------|
|            | Forecast   | Observed | Forecast   | Observed | Forecast      | Observed | Forecast | Observed | Forecast | Observed | Forecast    | Observed |
|            | Dease Lake |          | Port Hardy |          | Prince Rupert |          | Sandspit |          | Terrace  |          | Watson Lake |          |
| 2004-05-01 |            |          |            |          |               |          |          |          |          |          |             |          |
| 2004-05-02 |            |          |            |          |               |          |          |          |          |          |             |          |
| 2004-05-03 |            |          |            |          |               |          |          |          |          |          |             |          |
| 2004-05-04 |            |          |            |          |               |          |          |          |          |          |             |          |
| 2004-05-05 |            |          |            |          |               |          |          |          |          |          |             |          |
| 2004-05-06 |            |          |            |          |               |          |          |          |          |          |             |          |
| 2004-05-07 |            |          |            |          |               |          |          |          |          |          |             |          |
| 2004-05-08 |            |          |            |          |               |          |          |          |          |          |             |          |
| 2004-05-09 |            |          |            |          |               |          |          |          |          |          |             |          |
| 2004-05-10 |            |          |            |          |               |          |          |          |          |          |             |          |
| 2004-05-11 |            |          |            |          |               |          |          |          |          |          |             |          |
| 2004-05-12 |            |          |            |          |               |          |          |          |          |          |             |          |
| 2004-05-13 |            |          |            |          |               |          |          |          |          |          |             |          |
| 2004-05-14 |            |          |            |          |               |          |          |          |          |          |             |          |
| 2004-05-15 |            |          |            |          |               |          |          |          |          |          |             |          |
| 2004-05-16 |            |          |            |          |               |          |          |          |          |          |             |          |
| 2004-05-17 |            |          |            |          |               |          |          |          |          |          |             |          |
| 2004-05-18 |            |          |            |          |               |          |          |          |          |          |             |          |
| 2004-05-19 |            |          |            |          |               |          |          |          |          |          |             |          |
| 2004-05-20 |            |          |            |          |               |          |          |          |          |          |             |          |
| 2004-05-21 |            |          |            |          |               |          |          |          |          |          |             |          |
| 2004-05-22 |            |          |            |          |               |          |          |          |          |          |             |          |
| 2004-05-23 |            |          |            |          |               |          |          |          |          |          |             |          |
| 2004-05-24 |            |          |            |          |               |          |          |          |          |          |             |          |
| 2004-05-25 |            |          |            |          |               |          |          |          |          |          |             |          |
| 2004-05-26 |            |          |            |          |               |          |          |          |          |          |             |          |
| 2004-05-27 |            |          |            |          |               |          |          |          |          |          |             |          |
| 2004-05-28 |            |          |            |          |               |          |          |          |          |          |             |          |
| 2004-05-29 |            |          |            |          |               |          |          |          |          |          |             |          |
| 2004-05-30 |            |          |            |          |               |          |          |          |          |          |             |          |
| 2004-05-31 |            |          |            |          |               |          |          |          |          |          |             |          |
| 2004-06-01 |            |          |            |          |               |          |          |          |          |          |             |          |
| 2004-06-02 |            |          |            |          |               |          |          |          |          |          |             |          |
| 2004-06-03 |            |          |            |          |               |          |          |          |          |          |             |          |
| 2004-06-04 |            |          |            |          |               |          |          |          |          |          |             |          |
| 2004-06-05 |            |          |            |          |               |          |          |          |          |          |             |          |
| 2004-06-06 |            |          |            |          |               |          |          |          |          |          |             |          |
| 2004-06-07 |            |          |            |          |               |          |          |          |          |          |             |          |
| 2004-06-08 |            |          |            |          |               |          |          |          |          |          |             |          |
| 2004-06-09 |            |          |            |          |               |          |          |          |          |          |             |          |
| 2004-06-10 |            |          |            |          |               |          |          |          |          |          |             |          |
| 2004-06-11 |            |          |            |          |               |          |          |          |          |          |             |          |
| 2004-06-12 |            |          |            |          |               |          |          |          |          |          |             |          |
| 2004-06-13 |            |          |            |          |               |          |          |          |          |          |             |          |
| 2004-06-14 |            |          |            |          |               |          |          |          |          |          |             |          |
| 2004-06-15 |            |          |            |          |               |          |          |          |          |          |             |          |
| 2004-06-16 |            |          |            |          |               |          |          |          |          |          |             |          |
| 2004-06-17 |            |          |            |          |               |          |          |          |          |          |             |          |
| 2004-06-18 |            |          |            |          |               |          |          |          |          |          |             |          |
| 2004-06-19 |            |          |            |          |               |          |          |          |          |          |             |          |
| 2004-06-20 |            |          |            |          |               |          |          |          |          |          |             |          |
| 2004-06-21 |            |          |            |          |               |          |          |          |          |          |             |          |
| 2004-06-22 |            |          |            |          |               |          |          |          |          |          |             |          |
| 2004-06-23 |            |          |            |          |               |          |          |          |          |          |             |          |
| 2004-06-24 |            |          |            |          |               |          |          |          |          |          |             |          |
| 2004-06-25 |            |          |            |          |               |          |          |          |          |          |             |          |
| 2004-06-26 |            |          |            |          |               |          |          |          |          |          |             |          |
| 2004-06-27 |            |          |            |          |               |          |          |          |          |          |             |          |
| 2004-06-28 |            |          |            |          |               |          |          |          |          |          |             |          |
| 2004-06-29 |            |          |            |          |               |          |          |          |          |          |             |          |
| 2004-06-30 |            |          |            |          |               |          |          |          |          |          |             |          |
| 2004-07-01 |            |          |            |          |               |          |          |          |          |          |             |          |
| 2004-07-02 |            |          |            |          |               |          |          |          |          |          |             |          |
| 2004-07-03 |            |          |            |          |               |          |          |          |          |          |             |          |
| 2004-07-04 |            |          |            |          |               |          |          |          |          |          |             |          |
| 2004-07-05 |            |          |            |          |               |          |          |          |          |          |             |          |
| 2004-07-06 |            |          |            |          |               |          |          |          |          |          |             |          |
| 2004-07-07 |            |          |            |          |               |          |          |          |          |          |             |          |
| 2004-07-08 |            |          |            |          |               |          |          |          |          |          |             |          |
| 2004-07-09 |            |          |            |          |               |          |          |          |          |          |             |          |
| 2004-07-10 |            |          |            |          |               |          |          |          |          |          |             |          |
| 2004-07-11 |            |          |            |          |               |          |          |          |          |          |             |          |
| 2004-07-12 |            |          |            |          |               |          |          |          |          |          |             |          |
| 2004-07-13 |            |          |            |          |               |          |          |          |          |          |             |          |
| 2004-07-14 |            |          |            |          |               |          |          |          |          |          |             |          |
| 2004-07-15 |            |          |            |          |               |          |          |          |          |          |             |          |
| 2004-07-16 |            |          |            |          |               |          |          |          |          |          |             |          |
| 2004-07-17 |            |          |            |          |               |          |          |          |          |          |             |          |
| 2004-07-18 |            |          |            |          |               |          |          |          |          |          |             |          |
| 2004-07-19 |            |          |            |          |               |          |          |          |          |          |             |          |
| 2004-07-20 |            |          |            |          |               |          |          |          |          |          |             |          |
| 2004-07-21 |            |          |            |          |               |          |          |          |          |          |             |          |
| 2004-07-22 |            |          |            |          |               |          |          |          |          |          |             |          |
| 2004-07-23 |            |          |            |          |               |          |          |          |          |          |             |          |
| 2004-07-24 |            |          |            |          |               |          |          |          |          |          |             |          |
| 2004-07-25 |            |          |            |          |               |          |          |          |          |          |             |          |
| 2004-07-26 |            |          |            |          |               |          |          |          |          |          |             |          |
| 2004-07-27 |            |          |            |          |               |          |          |          |          |          |             |          |
| 2004-07-28 |            |          |            |          |               |          |          |          |          |          |             |          |
| 2004-07-29 |            |          |            |          |               |          |          |          |          |          |             |          |
| 2004-07-30 |            |          |            |          |               |          |          |          |          |          |             |          |
| 2004-07-31 |            |          |            |          |               |          |          |          |          |          |             |          |
| 2004-08-01 |            |          |            |          |               |          |          |          |          |          |             |          |
| 2004-08-02 |            |          |            |          |               |          |          |          |          |          |             |          |
| 2004-08-03 |            |          |            |          |               |          |          |          |          |          |             |          |
| 2004-08-04 |            |          |            |          |               |          |          |          |          |          |             |          |
| 2004-08-05 |            |          |            |          |               |          |          |          |          |          |             |          |
| 2004-08-06 |            |          |            |          |               |          |          |          |          |          |             |          |
| 2004-08-07 |            |          |            |          |               |          |          |          |          |          |             |          |
| 2004-08-08 |            |          |            |          |               |          |          |          |          |          |             |          |
| 2004-08-09 |            |          |            |          |               |          |          |          |          |          |             |          |
| 2004-08-10 |            |          |            |          |               |          |          |          |          |          |             |          |
| 2004-08-11 |            |          |            |          |               |          |          |          |          |          |             |          |
| 2004-08-12 |            |          |            |          |               |          |          |          |          |          |             |          |
| 2004-08-13 |            |          |            |          |               |          |          |          |          |          |             |          |
| 2004-08-14 |            |          |            |          |               |          |          |          |          |          |             |          |
| 2004-08-15 |            |          |            |          |               |          |          |          |          |          |             |          |
| 2004-08-16 |            |          |            |          |               |          |          |          |          |          |             |          |
| 2004-08-17 |            |          |            |          |               |          |          |          |          |          |             |          |
| 2004-08-18 |            |          |            |          |               |          |          |          |          |          |             |          |
| 2004-08-19 |            |          |            |          |               |          |          |          |          |          |             |          |
| 2004-08-20 |            |          |            |          |               |          |          |          |          |          |             |          |
| 2004-08-21 |            |          |            |          |               |          |          |          |          |          |             |          |
| 2004-08-22 |            |          |            |          |               |          |          |          |          |          |             |          |
| 2004-08-23 |            |          |            |          |               |          |          |          |          |          |             |          |
| 2004-08-24 |            |          |            |          |               |          |          |          |          |          |             |          |
| 2004-08-25 |            |          |            |          |               |          |          |          |          |          |             |          |
| 2004-08-26 |            |          |            |          |               |          |          |          |          |          |             |          |
| 2004-08-27 |            |          |            |          |               |          |          |          |          |          |             |          |
| 2004-08-28 |            |          |            |          |               |          |          |          |          |          |             |          |
| 2004-08-29 |            |          |            |          |               |          |          |          |          |          |             |          |
| 2004-08-30 |            |          |            |          |               |          |          |          |          |          |             |          |
| 2004-08-31 |            |          |            |          |               |          |          |          |          |          |             |          |
| 2004-09-01 |            |          |            |          |               |          |          |          |          |          |             |          |
| 2004-09-02 |            |          |            |          |               |          |          |          |          |          |             |          |
| 2004-09-03 |            |          |            |          |               |          |          |          |          |          |             |          |
| 2004-09-04 |            |          |            |          |               |          |          |          |          |          |             |          |
| 2004-09-05 |            |          |            |          |               |          |          |          |          |          |             |          |
| 2004-09-06 |            |          |            |          |               |          |          |          |          |          |             |          |
| 2004-09-07 |            |          |            |          |               |          |          |          |          |          |             |          |
| 2004-09-08 |            |          |            |          |               |          |          |          |          |          |             |          |
| 2004-09-09 |            |          |            |          |               |          |          |          |          |          |             |          |
| 2004-09-10 |            |          |            |          |               |          |          |          |          |          |             |          |
| 2004-09-11 |            |          |            |          |               |          |          |          |          |          |             |          |
| 2004-09-12 |            |          |            |          |               |          |          |          |          |          |             |          |
| 2004-09-13 |            |          |            |          |               |          |          |          |          |          |             |          |
| 2004-09-14 |            |          |            |          |               |          |          |          |          |          |             |          |
| 2004-09-15 |            |          |            |          |               |          |          |          |          |          |             |          |
| 2004-09-16 |            |          |            |          |               |          |          |          |          |          |             |          |
| 2004-09-17 |            |          |            |          |               |          |          |          |          |          |             |          |
| 2004-09-18 |            |          |            |          |               |          |          |          |          |          |             |          |
| 2004-09-19 |            |          |            |          |               |          |          |          |          |          |             |          |
| 2004-09-20 |            |          |            |          |               |          |          |          |          |          |             |          |
| 2004-09-21 |            |          |            |          |               |          |          |          |          |          |             |          |
| 2004-09-22 |            |          |            |          |               |          |          |          |          |          |             |          |
| 2004-09-23 |            |          |            |          |               |          |          |          |          |          |             |          |
| 2004-09-24 |            |          |            |          |               |          |          |          |          |          |             |          |
| 2004-09-25 |            |          |            |          |               |          |          |          |          |          |             |          |
| 2004-09-26 |            |          |            |          |               |          |          |          |          |          |             |          |
| 2004-09-27 |            |          |            |          |               |          |          |          |          |          |             |          |
| 2004-09-28 |            |          |            |          |               |          |          |          |          |          |             |          |
| 2004-09-29 |            |          |            |          |               |          |          |          |          |          |             |          |
| 2004-09-30 |            |          |            |          |               |          |          |          |          |          |             |          |

## Northwest

Category:  No Alert  Category 2  Category 1  Category 0

| Date       | Station    |          |            |          |               |          |          |          |          |          |             |          |
|------------|------------|----------|------------|----------|---------------|----------|----------|----------|----------|----------|-------------|----------|
|            | Forecast   | Observed | Forecast   | Observed | Forecast      | Observed | Forecast | Observed | Forecast | Observed | Forecast    | Observed |
|            | Dease Lake |          | Port Hardy |          | Prince Rupert |          | Sandspit |          | Terrace  |          | Watson Lake |          |
| 2005-05-01 |            |          |            |          |               |          |          |          |          |          |             |          |
| 2005-05-02 |            |          |            |          |               |          |          |          |          |          |             |          |
| 2005-05-03 |            |          |            |          |               |          |          |          |          |          |             |          |
| 2005-05-04 |            |          |            |          |               |          |          |          |          |          |             |          |
| 2005-05-05 |            |          |            |          |               |          |          |          |          |          |             |          |
| 2005-05-06 |            |          |            |          |               |          |          |          |          |          |             |          |
| 2005-05-07 |            |          |            |          |               |          |          |          |          |          |             |          |
| 2005-05-08 |            |          |            |          |               |          |          |          |          |          |             |          |
| 2005-05-09 |            |          |            |          |               |          |          |          |          |          |             |          |
| 2005-05-10 |            |          |            |          |               |          |          |          |          |          |             |          |
| 2005-05-11 |            |          |            |          |               |          |          |          |          |          |             |          |
| 2005-05-12 |            |          |            |          |               |          |          |          |          |          |             |          |
| 2005-05-13 |            |          |            |          |               |          |          |          |          |          |             |          |
| 2005-05-14 |            |          |            |          |               |          |          |          |          |          |             |          |
| 2005-05-15 |            |          |            |          |               |          |          |          |          |          |             |          |
| 2005-05-16 |            |          |            |          |               |          |          |          |          |          |             |          |
| 2005-05-17 |            |          |            |          |               |          |          |          |          |          |             |          |
| 2005-05-18 |            |          |            |          |               |          |          |          |          |          |             |          |
| 2005-05-19 |            |          |            |          |               |          |          |          |          |          |             |          |
| 2005-05-20 |            |          |            |          |               |          |          |          |          |          |             |          |
| 2005-05-21 |            |          |            |          |               |          |          |          |          |          |             |          |
| 2005-05-22 |            |          |            |          |               |          |          |          |          |          |             |          |
| 2005-05-23 |            |          |            |          |               |          |          |          |          |          |             |          |
| 2005-05-24 |            |          |            |          |               |          |          |          |          |          |             |          |
| 2005-05-25 |            |          |            |          |               |          |          |          |          |          |             |          |
| 2005-05-26 |            |          |            |          |               |          |          |          |          |          |             |          |
| 2005-05-27 |            |          |            |          |               |          |          |          |          |          |             |          |
| 2005-05-28 |            |          |            |          |               |          |          |          |          |          |             |          |
| 2005-05-29 |            |          |            |          |               |          |          |          |          |          |             |          |
| 2005-05-30 |            |          |            |          |               |          |          |          |          |          |             |          |
| 2005-05-31 |            |          |            |          |               |          |          |          |          |          |             |          |
| 2005-06-01 |            |          |            |          |               |          |          |          |          |          |             |          |
| 2005-06-02 |            |          |            |          |               |          |          |          |          |          |             |          |
| 2005-06-03 |            |          |            |          |               |          |          |          |          |          |             |          |
| 2005-06-04 |            |          |            |          |               |          |          |          |          |          |             |          |
| 2005-06-05 |            |          |            |          |               |          |          |          |          |          |             |          |
| 2005-06-06 |            |          |            |          |               |          |          |          |          |          |             |          |
| 2005-06-07 |            |          |            |          |               |          |          |          |          |          |             |          |
| 2005-06-08 |            |          |            |          |               |          |          |          |          |          |             |          |
| 2005-06-09 |            |          |            |          |               |          |          |          |          |          |             |          |
| 2005-06-10 |            |          |            |          |               |          |          |          |          |          |             |          |
| 2005-06-11 |            |          |            |          |               |          |          |          |          |          |             |          |
| 2005-06-12 |            |          |            |          |               |          |          |          |          |          |             |          |
| 2005-06-13 |            |          |            |          |               |          |          |          |          |          |             |          |
| 2005-06-14 |            |          |            |          |               |          |          |          |          |          |             |          |
| 2005-06-15 |            |          |            |          |               |          |          |          |          |          |             |          |
| 2005-06-16 |            |          |            |          |               |          |          |          |          |          |             |          |
| 2005-06-17 |            |          |            |          |               |          |          |          |          |          |             |          |
| 2005-06-18 |            |          |            |          |               |          |          |          |          |          |             |          |
| 2005-06-19 |            |          |            |          |               |          |          |          |          |          |             |          |
| 2005-06-20 |            |          |            |          |               |          |          |          |          |          |             |          |
| 2005-06-21 |            |          |            |          |               |          |          |          |          |          |             |          |
| 2005-06-22 |            |          |            |          |               |          |          |          |          |          |             |          |
| 2005-06-23 |            |          |            |          |               |          |          |          |          |          |             |          |
| 2005-06-24 |            |          |            |          |               |          |          |          |          |          |             |          |
| 2005-06-25 |            |          |            |          |               |          |          |          |          |          |             |          |
| 2005-06-26 |            |          |            |          |               |          |          |          |          |          |             |          |
| 2005-06-27 |            |          |            |          |               |          |          |          |          |          |             |          |
| 2005-06-28 |            |          |            |          |               |          |          |          |          |          |             |          |
| 2005-06-29 |            |          |            |          |               |          |          |          |          |          |             |          |
| 2005-06-30 |            |          |            |          |               |          |          |          |          |          |             |          |
| 2005-07-01 |            |          |            |          |               |          |          |          |          |          |             |          |
| 2005-07-02 |            |          |            |          |               |          |          |          |          |          |             |          |
| 2005-07-03 |            |          |            |          |               |          |          |          |          |          |             |          |
| 2005-07-04 |            |          |            |          |               |          |          |          |          |          |             |          |
| 2005-07-05 |            |          |            |          |               |          |          |          |          |          |             |          |
| 2005-07-06 |            |          |            |          |               |          |          |          |          |          |             |          |
| 2005-07-07 |            |          |            |          |               |          |          |          |          |          |             |          |
| 2005-07-08 |            |          |            |          |               |          |          |          |          |          |             |          |
| 2005-07-09 |            |          |            |          |               |          |          |          |          |          |             |          |
| 2005-07-10 |            |          |            |          |               |          |          |          |          |          |             |          |
| 2005-07-11 |            |          |            |          |               |          |          |          |          |          |             |          |
| 2005-07-12 |            |          |            |          |               |          |          |          |          |          |             |          |
| 2005-07-13 |            |          |            |          |               |          |          |          |          |          |             |          |
| 2005-07-14 |            |          |            |          |               |          |          |          |          |          |             |          |
| 2005-07-15 |            |          |            |          |               |          |          |          |          |          |             |          |
| 2005-07-16 |            |          |            |          |               |          |          |          |          |          |             |          |
| 2005-07-17 |            |          |            |          |               |          |          |          |          |          |             |          |
| 2005-07-18 |            |          |            |          |               |          |          |          |          |          |             |          |
| 2005-07-19 |            |          |            |          |               |          |          |          |          |          |             |          |
| 2005-07-20 |            |          |            |          |               |          |          |          |          |          |             |          |
| 2005-07-21 |            |          |            |          |               |          |          |          |          |          |             |          |
| 2005-07-22 |            |          |            |          |               |          |          |          |          |          |             |          |
| 2005-07-23 |            |          |            |          |               |          |          |          |          |          |             |          |
| 2005-07-24 |            |          |            |          |               |          |          |          |          |          |             |          |
| 2005-07-25 |            |          |            |          |               |          |          |          |          |          |             |          |
| 2005-07-26 |            |          |            |          |               |          |          |          |          |          |             |          |
| 2005-07-27 |            |          |            |          |               |          |          |          |          |          |             |          |
| 2005-07-28 |            |          |            |          |               |          |          |          |          |          |             |          |
| 2005-07-29 |            |          |            |          |               |          |          |          |          |          |             |          |
| 2005-07-30 |            |          |            |          |               |          |          |          |          |          |             |          |
| 2005-07-31 |            |          |            |          |               |          |          |          |          |          |             |          |
| 2005-08-01 |            |          |            |          |               |          |          |          |          |          |             |          |
| 2005-08-02 |            |          |            |          |               |          |          |          |          |          |             |          |
| 2005-08-03 |            |          |            |          |               |          |          |          |          |          |             |          |
| 2005-08-04 |            |          |            |          |               |          |          |          |          |          |             |          |
| 2005-08-05 |            |          |            |          |               |          |          |          |          |          |             |          |
| 2005-08-06 |            |          |            |          |               |          |          |          |          |          |             |          |
| 2005-08-07 |            |          |            |          |               |          |          |          |          |          |             |          |
| 2005-08-08 |            |          |            |          |               |          |          |          |          |          |             |          |
| 2005-08-09 |            |          |            |          |               |          |          |          |          |          |             |          |
| 2005-08-10 |            |          |            |          |               |          |          |          |          |          |             |          |
| 2005-08-11 |            |          |            |          |               |          |          |          |          |          |             |          |
| 2005-08-12 |            |          |            |          |               |          |          |          |          |          |             |          |
| 2005-08-13 |            |          |            |          |               |          |          |          |          |          |             |          |
| 2005-08-14 |            |          |            |          |               |          |          |          |          |          |             |          |
| 2005-08-15 |            |          |            |          |               |          |          |          |          |          |             |          |
| 2005-08-16 |            |          |            |          |               |          |          |          |          |          |             |          |
| 2005-08-17 |            |          |            |          |               |          |          |          |          |          |             |          |
| 2005-08-18 |            |          |            |          |               |          |          |          |          |          |             |          |
| 2005-08-19 |            |          |            |          |               |          |          |          |          |          |             |          |
| 2005-08-20 |            |          |            |          |               |          |          |          |          |          |             |          |
| 2005-08-21 |            |          |            |          |               |          |          |          |          |          |             |          |
| 2005-08-22 |            |          |            |          |               |          |          |          |          |          |             |          |
| 2005-08-23 |            |          |            |          |               |          |          |          |          |          |             |          |
| 2005-08-24 |            |          |            |          |               |          |          |          |          |          |             |          |
| 2005-08-25 |            |          |            |          |               |          |          |          |          |          |             |          |
| 2005-08-26 |            |          |            |          |               |          |          |          |          |          |             |          |
| 2005-08-27 |            |          |            |          |               |          |          |          |          |          |             |          |
| 2005-08-28 |            |          |            |          |               |          |          |          |          |          |             |          |
| 2005-08-29 |            |          |            |          |               |          |          |          |          |          |             |          |
| 2005-08-30 |            |          |            |          |               |          |          |          |          |          |             |          |
| 2005-08-31 |            |          |            |          |               |          |          |          |          |          |             |          |
| 2005-09-01 |            |          |            |          |               |          |          |          |          |          |             |          |
| 2005-09-02 |            |          |            |          |               |          |          |          |          |          |             |          |
| 2005-09-03 |            |          |            |          |               |          |          |          |          |          |             |          |
| 2005-09-04 |            |          |            |          |               |          |          |          |          |          |             |          |
| 2005-09-05 |            |          |            |          |               |          |          |          |          |          |             |          |
| 2005-09-06 |            |          |            |          |               |          |          |          |          |          |             |          |
| 2005-09-07 |            |          |            |          |               |          |          |          |          |          |             |          |
| 2005-09-08 |            |          |            |          |               |          |          |          |          |          |             |          |
| 2005-09-09 |            |          |            |          |               |          |          |          |          |          |             |          |
| 2005-09-10 |            |          |            |          |               |          |          |          |          |          |             |          |
| 2005-09-11 |            |          |            |          |               |          |          |          |          |          |             |          |
| 2005-09-12 |            |          |            |          |               |          |          |          |          |          |             |          |
| 2005-09-13 |            |          |            |          |               |          |          |          |          |          |             |          |
| 2005-09-14 |            |          |            |          |               |          |          |          |          |          |             |          |
| 2005-09-15 |            |          |            |          |               |          |          |          |          |          |             |          |
| 2005-09-16 |            |          |            |          |               |          |          |          |          |          |             |          |
| 2005-09-17 |            |          |            |          |               |          |          |          |          |          |             |          |
| 2005-09-18 |            |          |            |          |               |          |          |          |          |          |             |          |
| 2005-09-19 |            |          |            |          |               |          |          |          |          |          |             |          |
| 2005-09-20 |            |          |            |          |               |          |          |          |          |          |             |          |
| 2005-09-21 |            |          |            |          |               |          |          |          |          |          |             |          |
| 2005-09-22 |            |          |            |          |               |          |          |          |          |          |             |          |
| 2005-09-23 |            |          |            |          |               |          |          |          |          |          |             |          |
| 2005-09-24 |            |          |            |          |               |          |          |          |          |          |             |          |
| 2005-09-25 |            |          |            |          |               |          |          |          |          |          |             |          |
| 2005-09-26 |            |          |            |          |               |          |          |          |          |          |             |          |
| 2005-09-27 |            |          |            |          |               |          |          |          |          |          |             |          |
| 2005-09-28 |            |          |            |          |               |          |          |          |          |          |             |          |
| 2005-09-29 |            |          |            |          |               |          |          |          |          |          |             |          |
| 2005-09-30 |            |          |            |          |               |          |          |          |          |          |             |          |

## Northwest

Category:  No Alert  Category 2  Category 1  Category 0

|            | Station    |          |            |          |               |          |          |          |          |          |             |          |
|------------|------------|----------|------------|----------|---------------|----------|----------|----------|----------|----------|-------------|----------|
|            | Forecast   | Observed | Forecast   | Observed | Forecast      | Observed | Forecast | Observed | Forecast | Observed | Forecast    | Observed |
|            | Dease Lake |          | Port Hardy |          | Prince Rupert |          | Sandspit |          | Terrace  |          | Watson Lake |          |
| 2006-05-01 |            |          |            |          |               |          |          |          |          |          |             |          |
| 2006-05-02 |            |          |            |          |               |          |          |          |          |          |             |          |
| 2006-05-03 |            |          |            |          |               |          |          |          |          |          |             |          |
| 2006-05-04 |            |          |            |          |               |          |          |          |          |          |             |          |
| 2006-05-05 |            |          |            |          |               |          |          |          |          |          |             |          |
| 2006-05-06 |            |          |            |          |               |          |          |          |          |          |             |          |
| 2006-05-07 |            |          |            |          |               |          |          |          |          |          |             |          |
| 2006-05-08 |            |          |            |          |               |          |          |          |          |          |             |          |
| 2006-05-09 |            |          |            |          |               |          |          |          |          |          |             |          |
| 2006-05-10 |            |          |            |          |               |          |          |          |          |          |             |          |
| 2006-05-11 |            |          |            |          |               |          |          |          |          |          |             |          |
| 2006-05-12 |            |          |            |          |               |          |          |          |          |          |             |          |
| 2006-05-13 |            |          |            |          |               |          |          |          |          |          |             |          |
| 2006-05-14 |            |          |            |          |               |          |          |          |          |          |             |          |
| 2006-05-15 |            |          |            |          |               |          |          |          |          |          |             |          |
| 2006-05-16 |            |          |            |          |               |          |          |          |          |          |             |          |
| 2006-05-17 |            |          |            |          |               |          |          |          |          |          |             |          |
| 2006-05-18 |            |          |            |          |               |          |          |          |          |          |             |          |
| 2006-05-19 |            |          |            |          |               |          |          |          |          |          |             |          |
| 2006-05-20 |            |          |            |          |               |          |          |          |          |          |             |          |
| 2006-05-21 |            |          |            |          |               |          |          |          |          |          |             |          |
| 2006-05-22 |            |          |            |          |               |          |          |          |          |          |             |          |
| 2006-05-23 |            |          |            |          |               |          |          |          |          |          |             |          |
| 2006-05-24 |            |          |            |          |               |          |          |          |          |          |             |          |
| 2006-05-25 |            |          |            |          |               |          |          |          |          |          |             |          |
| 2006-05-26 |            |          |            |          |               |          |          |          |          |          |             |          |
| 2006-05-27 |            |          |            |          |               |          |          |          |          |          |             |          |
| 2006-05-28 |            |          |            |          |               |          |          |          |          |          |             |          |
| 2006-05-29 |            |          |            |          |               |          |          |          |          |          |             |          |
| 2006-05-30 |            |          |            |          |               |          |          |          |          |          |             |          |
| 2006-05-31 |            |          |            |          |               |          |          |          |          |          |             |          |
| 2006-06-01 |            |          |            |          |               |          |          |          |          |          |             |          |
| 2006-06-02 |            |          |            |          |               |          |          |          |          |          |             |          |
| 2006-06-03 |            |          |            |          |               |          |          |          |          |          |             |          |
| 2006-06-04 |            |          |            |          |               |          |          |          |          |          |             |          |
| 2006-06-05 |            |          |            |          |               |          |          |          |          |          |             |          |
| 2006-06-06 |            |          |            |          |               |          |          |          |          |          |             |          |
| 2006-06-07 |            |          |            |          |               |          |          |          |          |          |             |          |
| 2006-06-08 |            |          |            |          |               |          |          |          |          |          |             |          |
| 2006-06-09 |            |          |            |          |               |          |          |          |          |          |             |          |
| 2006-06-10 |            |          |            |          |               |          |          |          |          |          |             |          |
| 2006-06-11 |            |          |            |          |               |          |          |          |          |          |             |          |
| 2006-06-12 |            |          |            |          |               |          |          |          |          |          |             |          |
| 2006-06-13 |            |          |            |          |               |          |          |          |          |          |             |          |
| 2006-06-14 |            |          |            |          |               |          |          |          |          |          |             |          |
| 2006-06-15 |            |          |            |          |               |          |          |          |          |          |             |          |
| 2006-06-16 |            |          |            |          |               |          |          |          |          |          |             |          |
| 2006-06-17 |            |          |            |          |               |          |          |          |          |          |             |          |
| 2006-06-18 |            |          |            |          |               |          |          |          |          |          |             |          |
| 2006-06-19 |            |          |            |          |               |          |          |          |          |          |             |          |
| 2006-06-20 |            |          |            |          |               |          |          |          |          |          |             |          |
| 2006-06-21 |            |          |            |          |               |          |          |          |          |          |             |          |
| 2006-06-22 |            |          |            |          |               |          |          |          |          |          |             |          |
| 2006-06-23 |            |          |            |          |               |          |          |          |          |          |             |          |
| 2006-06-24 |            |          |            |          |               |          |          |          |          |          |             |          |
| 2006-06-25 |            |          |            |          |               |          |          |          |          |          |             |          |
| 2006-06-26 |            |          |            |          |               |          |          |          |          |          |             |          |
| 2006-06-27 |            |          |            |          |               |          |          |          |          |          |             |          |
| 2006-06-28 |            |          |            |          |               |          |          |          |          |          |             |          |
| 2006-06-29 |            |          |            |          |               |          |          |          |          |          |             |          |
| 2006-06-30 |            |          |            |          |               |          |          |          |          |          |             |          |
| 2006-07-01 |            |          |            |          |               |          |          |          |          |          |             |          |
| 2006-07-02 |            |          |            |          |               |          |          |          |          |          |             |          |
| 2006-07-03 |            |          |            |          |               |          |          |          |          |          |             |          |
| 2006-07-04 |            |          |            |          |               |          |          |          |          |          |             |          |
| 2006-07-05 |            |          |            |          |               |          |          |          |          |          |             |          |
| 2006-07-06 |            |          |            |          |               |          |          |          |          |          |             |          |
| 2006-07-07 |            |          |            |          |               |          |          |          |          |          |             |          |
| 2006-07-08 |            |          |            |          |               |          |          |          |          |          |             |          |
| 2006-07-09 |            |          |            |          |               |          |          |          |          |          |             |          |
| 2006-07-10 |            |          |            |          |               |          |          |          |          |          |             |          |
| 2006-07-11 |            |          |            |          |               |          |          |          |          |          |             |          |
| 2006-07-12 |            |          |            |          |               |          |          |          |          |          |             |          |
| 2006-07-13 |            |          |            |          |               |          |          |          |          |          |             |          |
| 2006-07-14 |            |          |            |          |               |          |          |          |          |          |             |          |
| 2006-07-15 |            |          |            |          |               |          |          |          |          |          |             |          |
| 2006-07-16 |            |          |            |          |               |          |          |          |          |          |             |          |
| 2006-07-17 |            |          |            |          |               |          |          |          |          |          |             |          |
| 2006-07-18 |            |          |            |          |               |          |          |          |          |          |             |          |
| 2006-07-19 |            |          |            |          |               |          |          |          |          |          |             |          |
| 2006-07-20 |            |          |            |          |               |          |          |          |          |          |             |          |
| 2006-07-21 |            |          |            |          |               |          |          |          |          |          |             |          |
| 2006-07-22 |            |          |            |          |               |          |          |          |          |          |             |          |
| 2006-07-23 |            |          |            |          |               |          |          |          |          |          |             |          |
| 2006-07-24 |            |          |            |          |               |          |          |          |          |          |             |          |
| 2006-07-25 |            |          |            |          |               |          |          |          |          |          |             |          |
| 2006-07-26 |            |          |            |          |               |          |          |          |          |          |             |          |
| 2006-07-27 |            |          |            |          |               |          |          |          |          |          |             |          |
| 2006-07-28 |            |          |            |          |               |          |          |          |          |          |             |          |
| 2006-07-29 |            |          |            |          |               |          |          |          |          |          |             |          |
| 2006-07-30 |            |          |            |          |               |          |          |          |          |          |             |          |
| 2006-07-31 |            |          |            |          |               |          |          |          |          |          |             |          |
| 2006-08-01 |            |          |            |          |               |          |          |          |          |          |             |          |
| 2006-08-02 |            |          |            |          |               |          |          |          |          |          |             |          |
| 2006-08-03 |            |          |            |          |               |          |          |          |          |          |             |          |
| 2006-08-04 |            |          |            |          |               |          |          |          |          |          |             |          |
| 2006-08-05 |            |          |            |          |               |          |          |          |          |          |             |          |
| 2006-08-06 |            |          |            |          |               |          |          |          |          |          |             |          |
| 2006-08-07 |            |          |            |          |               |          |          |          |          |          |             |          |
| 2006-08-08 |            |          |            |          |               |          |          |          |          |          |             |          |
| 2006-08-09 |            |          |            |          |               |          |          |          |          |          |             |          |
| 2006-08-10 |            |          |            |          |               |          |          |          |          |          |             |          |
| 2006-08-11 |            |          |            |          |               |          |          |          |          |          |             |          |
| 2006-08-12 |            |          |            |          |               |          |          |          |          |          |             |          |
| 2006-08-13 |            |          |            |          |               |          |          |          |          |          |             |          |
| 2006-08-14 |            |          |            |          |               |          |          |          |          |          |             |          |
| 2006-08-15 |            |          |            |          |               |          |          |          |          |          |             |          |
| 2006-08-16 |            |          |            |          |               |          |          |          |          |          |             |          |
| 2006-08-17 |            |          |            |          |               |          |          |          |          |          |             |          |
| 2006-08-18 |            |          |            |          |               |          |          |          |          |          |             |          |
| 2006-08-19 |            |          |            |          |               |          |          |          |          |          |             |          |
| 2006-08-20 |            |          |            |          |               |          |          |          |          |          |             |          |
| 2006-08-21 |            |          |            |          |               |          |          |          |          |          |             |          |
| 2006-08-22 |            |          |            |          |               |          |          |          |          |          |             |          |
| 2006-08-23 |            |          |            |          |               |          |          |          |          |          |             |          |
| 2006-08-24 |            |          |            |          |               |          |          |          |          |          |             |          |
| 2006-08-25 |            |          |            |          |               |          |          |          |          |          |             |          |
| 2006-08-26 |            |          |            |          |               |          |          |          |          |          |             |          |
| 2006-08-27 |            |          |            |          |               |          |          |          |          |          |             |          |
| 2006-08-28 |            |          |            |          |               |          |          |          |          |          |             |          |
| 2006-08-29 |            |          |            |          |               |          |          |          |          |          |             |          |
| 2006-08-30 |            |          |            |          |               |          |          |          |          |          |             |          |
| 2006-08-31 |            |          |            |          |               |          |          |          |          |          |             |          |
| 2006-09-01 |            |          |            |          |               |          |          |          |          |          |             |          |
| 2006-09-02 |            |          |            |          |               |          |          |          |          |          |             |          |
| 2006-09-03 |            |          |            |          |               |          |          |          |          |          |             |          |
| 2006-09-04 |            |          |            |          |               |          |          |          |          |          |             |          |
| 2006-09-05 |            |          |            |          |               |          |          |          |          |          |             |          |
| 2006-09-06 |            |          |            |          |               |          |          |          |          |          |             |          |
| 2006-09-07 |            |          |            |          |               |          |          |          |          |          |             |          |
| 2006-09-08 |            |          |            |          |               |          |          |          |          |          |             |          |
| 2006-09-09 |            |          |            |          |               |          |          |          |          |          |             |          |
| 2006-09-10 |            |          |            |          |               |          |          |          |          |          |             |          |
| 2006-09-11 |            |          |            |          |               |          |          |          |          |          |             |          |
| 2006-09-12 |            |          |            |          |               |          |          |          |          |          |             |          |
| 2006-09-13 |            |          |            |          |               |          |          |          |          |          |             |          |
| 2006-09-14 |            |          |            |          |               |          |          |          |          |          |             |          |
| 2006-09-15 |            |          |            |          |               |          |          |          |          |          |             |          |
| 2006-09-16 |            |          |            |          |               |          |          |          |          |          |             |          |
| 2006-09-17 |            |          |            |          |               |          |          |          |          |          |             |          |
| 2006-09-18 |            |          |            |          |               |          |          |          |          |          |             |          |
| 2006-09-19 |            |          |            |          |               |          |          |          |          |          |             |          |
| 2006-09-20 |            |          |            |          |               |          |          |          |          |          |             |          |
| 2006-09-21 |            |          |            |          |               |          |          |          |          |          |             |          |
| 2006-09-22 |            |          |            |          |               |          |          |          |          |          |             |          |
| 2006-09-23 |            |          |            |          |               |          |          |          |          |          |             |          |
| 2006-09-24 |            |          |            |          |               |          |          |          |          |          |             |          |
| 2006-09-25 |            |          |            |          |               |          |          |          |          |          |             |          |
| 2006-09-26 |            |          |            |          |               |          |          |          |          |          |             |          |
| 2006-09-27 |            |          |            |          |               |          |          |          |          |          |             |          |
| 2006-09-28 |            |          |            |          |               |          |          |          |          |          |             |          |
| 2006-09-29 |            |          |            |          |               |          |          |          |          |          |             |          |
| 2006-09-30 |            |          |            |          |               |          |          |          |          |          |             |          |

| Northwest  |            |  |            |          |               |          |            |          |            |          |             |          |
|------------|------------|--|------------|----------|---------------|----------|------------|----------|------------|----------|-------------|----------|
| Date       | Category:  |  | No Alert   |          | Category 2    |          | Category 1 |          | Category 0 |          |             |          |
|            |            |  |            |          |               |          |            |          |            |          |             |          |
|            | Station    |  | Forecast   | Observed | Forecast      | Observed | Forecast   | Observed | Forecast   | Observed | Forecast    | Observed |
|            | Dease Lake |  | Port Hardy |          | Prince Rupert |          | Sandspit   |          | Terrace    |          | Watson Lake |          |
| 2007-05-01 |            |  |            |          |               |          |            |          |            |          |             |          |
| 2007-05-02 |            |  |            |          |               |          |            |          |            |          |             |          |
| 2007-05-03 |            |  |            |          |               |          |            |          |            |          |             |          |
| 2007-05-04 |            |  |            |          |               |          |            |          |            |          |             |          |
| 2007-05-05 |            |  |            |          |               |          |            |          |            |          |             |          |
| 2007-05-06 |            |  |            |          |               |          |            |          |            |          |             |          |
| 2007-05-07 |            |  |            |          |               |          |            |          |            |          |             |          |
| 2007-05-08 |            |  |            |          |               |          |            |          |            |          |             |          |
| 2007-05-09 |            |  |            |          |               |          |            |          |            |          |             |          |
| 2007-05-10 |            |  |            |          |               |          |            |          |            |          |             |          |
| 2007-05-11 |            |  |            |          |               |          |            |          |            |          |             |          |
| 2007-05-12 |            |  |            |          |               |          |            |          |            |          |             |          |
| 2007-05-13 |            |  |            |          |               |          |            |          |            |          |             |          |
| 2007-05-14 |            |  |            |          |               |          |            |          |            |          |             |          |
| 2007-05-15 |            |  |            |          |               |          |            |          |            |          |             |          |
| 2007-05-16 |            |  |            |          |               |          |            |          |            |          |             |          |
| 2007-05-17 |            |  |            |          |               |          |            |          |            |          |             |          |
| 2007-05-18 |            |  |            |          |               |          |            |          |            |          |             |          |
| 2007-05-19 |            |  |            |          |               |          |            |          |            |          |             |          |
| 2007-05-20 |            |  |            |          |               |          |            |          |            |          |             |          |
| 2007-05-21 |            |  |            |          |               |          |            |          |            |          |             |          |
| 2007-05-22 |            |  |            |          |               |          |            |          |            |          |             |          |
| 2007-05-23 |            |  |            |          |               |          |            |          |            |          |             |          |
| 2007-05-24 |            |  |            |          |               |          |            |          |            |          |             |          |
| 2007-05-25 |            |  |            |          |               |          |            |          |            |          |             |          |
| 2007-05-26 |            |  |            |          |               |          |            |          |            |          |             |          |
| 2007-05-27 |            |  |            |          |               |          |            |          |            |          |             |          |
| 2007-05-28 |            |  |            |          |               |          |            |          |            |          |             |          |
| 2007-05-29 |            |  |            |          |               |          |            |          |            |          |             |          |
| 2007-05-30 |            |  |            |          |               |          |            |          |            |          |             |          |
| 2007-05-31 |            |  |            |          |               |          |            |          |            |          |             |          |
| 2007-06-01 |            |  |            |          |               |          |            |          |            |          |             |          |
| 2007-06-02 |            |  |            |          |               |          |            |          |            |          |             |          |
| 2007-06-03 |            |  |            |          |               |          |            |          |            |          |             |          |
| 2007-06-04 |            |  |            |          |               |          |            |          |            |          |             |          |
| 2007-06-05 |            |  |            |          |               |          |            |          |            |          |             |          |
| 2007-06-06 |            |  |            |          |               |          |            |          |            |          |             |          |
| 2007-06-07 |            |  |            |          |               |          |            |          |            |          |             |          |
| 2007-06-08 |            |  |            |          |               |          |            |          |            |          |             |          |
| 2007-06-09 |            |  |            |          |               |          |            |          |            |          |             |          |
| 2007-06-10 |            |  |            |          |               |          |            |          |            |          |             |          |
| 2007-06-11 |            |  |            |          |               |          |            |          |            |          |             |          |
| 2007-06-12 |            |  |            |          |               |          |            |          |            |          |             |          |
| 2007-06-13 |            |  |            |          |               |          |            |          |            |          |             |          |
| 2007-06-14 |            |  |            |          |               |          |            |          |            |          |             |          |
| 2007-06-15 |            |  |            |          |               |          |            |          |            |          |             |          |
| 2007-06-16 |            |  |            |          |               |          |            |          |            |          |             |          |
| 2007-06-17 |            |  |            |          |               |          |            |          |            |          |             |          |
| 2007-06-18 |            |  |            |          |               |          |            |          |            |          |             |          |
| 2007-06-19 |            |  |            |          |               |          |            |          |            |          |             |          |
| 2007-06-20 |            |  |            |          |               |          |            |          |            |          |             |          |
| 2007-06-21 |            |  |            |          |               |          |            |          |            |          |             |          |
| 2007-06-22 |            |  |            |          |               |          |            |          |            |          |             |          |
| 2007-06-23 |            |  |            |          |               |          |            |          |            |          |             |          |
| 2007-06-24 |            |  |            |          |               |          |            |          |            |          |             |          |
| 2007-06-25 |            |  |            |          |               |          |            |          |            |          |             |          |
| 2007-06-26 |            |  |            |          |               |          |            |          |            |          |             |          |
| 2007-06-27 |            |  |            |          |               |          |            |          |            |          |             |          |
| 2007-06-28 |            |  |            |          |               |          |            |          |            |          |             |          |
| 2007-06-29 |            |  |            |          |               |          |            |          |            |          |             |          |
| 2007-06-30 |            |  |            |          |               |          |            |          |            |          |             |          |
| 2007-07-01 |            |  |            |          |               |          |            |          |            |          |             |          |
| 2007-07-02 |            |  |            |          |               |          |            |          |            |          |             |          |
| 2007-07-03 |            |  |            |          |               |          |            |          |            |          |             |          |
| 2007-07-04 |            |  |            |          |               |          |            |          |            |          |             |          |
| 2007-07-05 |            |  |            |          |               |          |            |          |            |          |             |          |
| 2007-07-06 |            |  |            |          |               |          |            |          |            |          |             |          |
| 2007-07-07 |            |  |            |          |               |          |            |          |            |          |             |          |
| 2007-07-08 |            |  |            |          |               |          |            |          |            |          |             |          |
| 2007-07-09 |            |  |            |          |               |          |            |          |            |          |             |          |
| 2007-07-10 |            |  |            |          |               |          |            |          |            |          |             |          |
| 2007-07-11 |            |  |            |          |               |          |            |          |            |          |             |          |
| 2007-07-12 |            |  |            |          |               |          |            |          |            |          |             |          |
| 2007-07-13 |            |  |            |          |               |          |            |          |            |          |             |          |
| 2007-07-14 |            |  |            |          |               |          |            |          |            |          |             |          |
| 2007-07-15 |            |  |            |          |               |          |            |          |            |          |             |          |
| 2007-07-16 |            |  |            |          |               |          |            |          |            |          |             |          |
| 2007-07-17 |            |  |            |          |               |          |            |          |            |          |             |          |
| 2007-07-18 |            |  |            |          |               |          |            |          |            |          |             |          |
| 2007-07-19 |            |  |            |          |               |          |            |          |            |          |             |          |
| 2007-07-20 |            |  |            |          |               |          |            |          |            |          |             |          |
| 2007-07-21 |            |  |            |          |               |          |            |          |            |          |             |          |
| 2007-07-22 |            |  |            |          |               |          |            |          |            |          |             |          |
| 2007-07-23 |            |  |            |          |               |          |            |          |            |          |             |          |
| 2007-07-24 |            |  |            |          |               |          |            |          |            |          |             |          |
| 2007-07-25 |            |  |            |          |               |          |            |          |            |          |             |          |
| 2007-07-26 |            |  |            |          |               |          |            |          |            |          |             |          |
| 2007-07-27 |            |  |            |          |               |          |            |          |            |          |             |          |
| 2007-07-28 |            |  |            |          |               |          |            |          |            |          |             |          |
| 2007-07-29 |            |  |            |          |               |          |            |          |            |          |             |          |
| 2007-07-30 |            |  |            |          |               |          |            |          |            |          |             |          |
| 2007-07-31 |            |  |            |          |               |          |            |          |            |          |             |          |
| 2007-08-01 |            |  |            |          |               |          |            |          |            |          |             |          |
| 2007-08-02 |            |  |            |          |               |          |            |          |            |          |             |          |
| 2007-08-03 |            |  |            |          |               |          |            |          |            |          |             |          |
| 2007-08-04 |            |  |            |          |               |          |            |          |            |          |             |          |
| 2007-08-05 |            |  |            |          |               |          |            |          |            |          |             |          |
| 2007-08-06 |            |  |            |          |               |          |            |          |            |          |             |          |
| 2007-08-07 |            |  |            |          |               |          |            |          |            |          |             |          |
| 2007-08-08 |            |  |            |          |               |          |            |          |            |          |             |          |
| 2007-08-09 |            |  |            |          |               |          |            |          |            |          |             |          |
| 2007-08-10 |            |  |            |          |               |          |            |          |            |          |             |          |
| 2007-08-11 |            |  |            |          |               |          |            |          |            |          |             |          |
| 2007-08-12 |            |  |            |          |               |          |            |          |            |          |             |          |
| 2007-08-13 |            |  |            |          |               |          |            |          |            |          |             |          |
| 2007-08-14 |            |  |            |          |               |          |            |          |            |          |             |          |
| 2007-08-15 |            |  |            |          |               |          |            |          |            |          |             |          |
| 2007-08-16 |            |  |            |          |               |          |            |          |            |          |             |          |
| 2007-08-17 |            |  |            |          |               |          |            |          |            |          |             |          |
| 2007-08-18 |            |  |            |          |               |          |            |          |            |          |             |          |
| 2007-08-19 |            |  |            |          |               |          |            |          |            |          |             |          |
| 2007-08-20 |            |  |            |          |               |          |            |          |            |          |             |          |
| 2007-08-21 |            |  |            |          |               |          |            |          |            |          |             |          |
| 2007-08-22 |            |  |            |          |               |          |            |          |            |          |             |          |
| 2007-08-23 |            |  |            |          |               |          |            |          |            |          |             |          |
| 2007-08-24 |            |  |            |          |               |          |            |          |            |          |             |          |
| 2007-08-25 |            |  |            |          |               |          |            |          |            |          |             |          |
| 2007-08-26 |            |  |            |          |               |          |            |          |            |          |             |          |
| 2007-08-27 |            |  |            |          |               |          |            |          |            |          |             |          |
| 2007-08-28 |            |  |            |          |               |          |            |          |            |          |             |          |
| 2007-08-29 |            |  |            |          |               |          |            |          |            |          |             |          |
| 2007-08-30 |            |  |            |          |               |          |            |          |            |          |             |          |
| 2007-08-31 |            |  |            |          |               |          |            |          |            |          |             |          |
| 2007-09-01 |            |  |            |          |               |          |            |          |            |          |             |          |
| 2007-09-02 |            |  |            |          |               |          |            |          |            |          |             |          |
| 2007-09-03 |            |  |            |          |               |          |            |          |            |          |             |          |
| 2007-09-04 |            |  |            |          |               |          |            |          |            |          |             |          |
| 2007-09-05 |            |  |            |          |               |          |            |          |            |          |             |          |
| 2007-09-06 |            |  |            |          |               |          |            |          |            |          |             |          |
| 2007-09-07 |            |  |            |          |               |          |            |          |            |          |             |          |
| 2007-09-08 |            |  |            |          |               |          |            |          |            |          |             |          |
| 2007-09-09 |            |  |            |          |               |          |            |          |            |          |             |          |
| 2007-09-10 |            |  |            |          |               |          |            |          |            |          |             |          |
| 2007-09-11 |            |  |            |          |               |          |            |          |            |          |             |          |
| 2007-09-12 |            |  |            |          |               |          |            |          |            |          |             |          |
| 2007-09-13 |            |  |            |          |               |          |            |          |            |          |             |          |
| 2007-09-14 |            |  |            |          |               |          |            |          |            |          |             |          |
| 2007-09-15 |            |  |            |          |               |          |            |          |            |          |             |          |
| 2007-09-16 |            |  |            |          |               |          |            |          |            |          |             |          |
| 2007-09-17 |            |  |            |          |               |          |            |          |            |          |             |          |
| 2007-09-18 |            |  |            |          |               |          |            |          |            |          |             |          |
| 2007-09-19 |            |  |            |          |               |          |            |          |            |          |             |          |
| 2007-09-20 |            |  |            |          |               |          |            |          |            |          |             |          |
| 2007-09-21 |            |  |            |          |               |          |            |          |            |          |             |          |
| 2007-09-22 |            |  |            |          |               |          |            |          |            |          |             |          |
| 2007-09-23 |            |  |            |          |               |          |            |          |            |          |             |          |
| 2007-09-24 |            |  |            |          |               |          |            |          |            |          |             |          |
| 2007-09-25 |            |  |            |          |               |          |            |          |            |          |             |          |
| 2007-09-26 |            |  |            |          |               |          |            |          |            |          |             |          |
| 2007-09-27 |            |  |            |          |               |          |            |          |            |          |             |          |
| 2007-09-28 |            |  |            |          |               |          |            |          |            |          |             |          |
| 2007-09-29 |            |  |            |          |               |          |            |          |            |          |             |          |
| 2007-09-30 |            |  |            |          |               |          |            |          |            |          |             |          |

## Northwest

Category:  No Alert  Category 2  Category 1  Category 0

| Date       | Station    |          |            |          |               |          |          |          |          |          |             |          |
|------------|------------|----------|------------|----------|---------------|----------|----------|----------|----------|----------|-------------|----------|
|            | Forecast   | Observed | Forecast   | Observed | Forecast      | Observed | Forecast | Observed | Forecast | Observed | Forecast    | Observed |
|            | Dease Lake |          | Port Hardy |          | Prince Rupert |          | Sandspit |          | Terrace  |          | Watson Lake |          |
| 2008-05-01 |            |          |            |          |               |          |          |          |          |          |             |          |
| 2008-05-02 |            |          |            |          |               |          |          |          |          |          |             |          |
| 2008-05-03 |            |          |            |          |               |          |          |          |          |          |             |          |
| 2008-05-04 |            |          |            |          |               |          |          |          |          |          |             |          |
| 2008-05-05 |            |          |            |          |               |          |          |          |          |          |             |          |
| 2008-05-06 |            |          |            |          |               |          |          |          |          |          |             |          |
| 2008-05-07 |            |          |            |          |               |          |          |          |          |          |             |          |
| 2008-05-08 |            |          |            |          |               |          |          |          |          |          |             |          |
| 2008-05-09 |            |          |            |          |               |          |          |          |          |          |             |          |
| 2008-05-10 |            |          |            |          |               |          |          |          |          |          |             |          |
| 2008-05-11 |            |          |            |          |               |          |          |          |          |          |             |          |
| 2008-05-12 |            |          |            |          |               |          |          |          |          |          |             |          |
| 2008-05-13 |            |          |            |          |               |          |          |          |          |          |             |          |
| 2008-05-14 |            |          |            |          |               |          |          |          |          |          |             |          |
| 2008-05-15 |            |          |            |          |               |          |          |          |          |          |             |          |
| 2008-05-16 |            |          |            |          |               |          |          |          |          |          |             |          |
| 2008-05-17 |            |          |            |          |               |          |          |          |          |          |             |          |
| 2008-05-18 |            |          |            |          |               |          |          |          |          |          |             |          |
| 2008-05-19 |            |          |            |          |               |          |          |          |          |          |             |          |
| 2008-05-20 |            |          |            |          |               |          |          |          |          |          |             |          |
| 2008-05-21 |            |          |            |          |               |          |          |          |          |          |             |          |
| 2008-05-22 |            |          |            |          |               |          |          |          |          |          |             |          |
| 2008-05-23 |            |          |            |          |               |          |          |          |          |          |             |          |
| 2008-05-24 |            |          |            |          |               |          |          |          |          |          |             |          |
| 2008-05-25 |            |          |            |          |               |          |          |          |          |          |             |          |
| 2008-05-26 |            |          |            |          |               |          |          |          |          |          |             |          |
| 2008-05-27 |            |          |            |          |               |          |          |          |          |          |             |          |
| 2008-05-28 |            |          |            |          |               |          |          |          |          |          |             |          |
| 2008-05-29 |            |          |            |          |               |          |          |          |          |          |             |          |
| 2008-05-30 |            |          |            |          |               |          |          |          |          |          |             |          |
| 2008-05-31 |            |          |            |          |               |          |          |          |          |          |             |          |
| 2008-06-01 |            |          |            |          |               |          |          |          |          |          |             |          |
| 2008-06-02 |            |          |            |          |               |          |          |          |          |          |             |          |
| 2008-06-03 |            |          |            |          |               |          |          |          |          |          |             |          |
| 2008-06-04 |            |          |            |          |               |          |          |          |          |          |             |          |
| 2008-06-05 |            |          |            |          |               |          |          |          |          |          |             |          |
| 2008-06-06 |            |          |            |          |               |          |          |          |          |          |             |          |
| 2008-06-07 |            |          |            |          |               |          |          |          |          |          |             |          |
| 2008-06-08 |            |          |            |          |               |          |          |          |          |          |             |          |
| 2008-06-09 |            |          |            |          |               |          |          |          |          |          |             |          |
| 2008-06-10 |            |          |            |          |               |          |          |          |          |          |             |          |
| 2008-06-11 |            |          |            |          |               |          |          |          |          |          |             |          |
| 2008-06-12 |            |          |            |          |               |          |          |          |          |          |             |          |
| 2008-06-13 |            |          |            |          |               |          |          |          |          |          |             |          |
| 2008-06-14 |            |          |            |          |               |          |          |          |          |          |             |          |
| 2008-06-15 |            |          |            |          |               |          |          |          |          |          |             |          |
| 2008-06-16 |            |          |            |          |               |          |          |          |          |          |             |          |
| 2008-06-17 |            |          |            |          |               |          |          |          |          |          |             |          |
| 2008-06-18 |            |          |            |          |               |          |          |          |          |          |             |          |
| 2008-06-19 |            |          |            |          |               |          |          |          |          |          |             |          |
| 2008-06-20 |            |          |            |          |               |          |          |          |          |          |             |          |
| 2008-06-21 |            |          |            |          |               |          |          |          |          |          |             |          |
| 2008-06-22 |            |          |            |          |               |          |          |          |          |          |             |          |
| 2008-06-23 |            |          |            |          |               |          |          |          |          |          |             |          |
| 2008-06-24 |            |          |            |          |               |          |          |          |          |          |             |          |
| 2008-06-25 |            |          |            |          |               |          |          |          |          |          |             |          |
| 2008-06-26 |            |          |            |          |               |          |          |          |          |          |             |          |
| 2008-06-27 |            |          |            |          |               |          |          |          |          |          |             |          |
| 2008-06-28 |            |          |            |          |               |          |          |          |          |          |             |          |
| 2008-06-29 |            |          |            |          |               |          |          |          |          |          |             |          |
| 2008-06-30 |            |          |            |          |               |          |          |          |          |          |             |          |
| 2008-07-01 |            |          |            |          |               |          |          |          |          |          |             |          |
| 2008-07-02 |            |          |            |          |               |          |          |          |          |          |             |          |
| 2008-07-03 |            |          |            |          |               |          |          |          |          |          |             |          |
| 2008-07-04 |            |          |            |          |               |          |          |          |          |          |             |          |
| 2008-07-05 |            |          |            |          |               |          |          |          |          |          |             |          |
| 2008-07-06 |            |          |            |          |               |          |          |          |          |          |             |          |
| 2008-07-07 |            |          |            |          |               |          |          |          |          |          |             |          |
| 2008-07-08 |            |          |            |          |               |          |          |          |          |          |             |          |
| 2008-07-09 |            |          |            |          |               |          |          |          |          |          |             |          |
| 2008-07-10 |            |          |            |          |               |          |          |          |          |          |             |          |
| 2008-07-11 |            |          |            |          |               |          |          |          |          |          |             |          |
| 2008-07-12 |            |          |            |          |               |          |          |          |          |          |             |          |
| 2008-07-13 |            |          |            |          |               |          |          |          |          |          |             |          |
| 2008-07-14 |            |          |            |          |               |          |          |          |          |          |             |          |
| 2008-07-15 |            |          |            |          |               |          |          |          |          |          |             |          |
| 2008-07-16 |            |          |            |          |               |          |          |          |          |          |             |          |
| 2008-07-17 |            |          |            |          |               |          |          |          |          |          |             |          |
| 2008-07-18 |            |          |            |          |               |          |          |          |          |          |             |          |
| 2008-07-19 |            |          |            |          |               |          |          |          |          |          |             |          |
| 2008-07-20 |            |          |            |          |               |          |          |          |          |          |             |          |
| 2008-07-21 |            |          |            |          |               |          |          |          |          |          |             |          |
| 2008-07-22 |            |          |            |          |               |          |          |          |          |          |             |          |
| 2008-07-23 |            |          |            |          |               |          |          |          |          |          |             |          |
| 2008-07-24 |            |          |            |          |               |          |          |          |          |          |             |          |
| 2008-07-25 |            |          |            |          |               |          |          |          |          |          |             |          |
| 2008-07-26 |            |          |            |          |               |          |          |          |          |          |             |          |
| 2008-07-27 |            |          |            |          |               |          |          |          |          |          |             |          |
| 2008-07-28 |            |          |            |          |               |          |          |          |          |          |             |          |
| 2008-07-29 |            |          |            |          |               |          |          |          |          |          |             |          |
| 2008-07-30 |            |          |            |          |               |          |          |          |          |          |             |          |
| 2008-07-31 |            |          |            |          |               |          |          |          |          |          |             |          |
| 2008-08-01 |            |          |            |          |               |          |          |          |          |          |             |          |
| 2008-08-02 |            |          |            |          |               |          |          |          |          |          |             |          |
| 2008-08-03 |            |          |            |          |               |          |          |          |          |          |             |          |
| 2008-08-04 |            |          |            |          |               |          |          |          |          |          |             |          |
| 2008-08-05 |            |          |            |          |               |          |          |          |          |          |             |          |
| 2008-08-06 |            |          |            |          |               |          |          |          |          |          |             |          |
| 2008-08-07 |            |          |            |          |               |          |          |          |          |          |             |          |
| 2008-08-08 |            |          |            |          |               |          |          |          |          |          |             |          |
| 2008-08-09 |            |          |            |          |               |          |          |          |          |          |             |          |
| 2008-08-10 |            |          |            |          |               |          |          |          |          |          |             |          |
| 2008-08-11 |            |          |            |          |               |          |          |          |          |          |             |          |
| 2008-08-12 |            |          |            |          |               |          |          |          |          |          |             |          |
| 2008-08-13 |            |          |            |          |               |          |          |          |          |          |             |          |
| 2008-08-14 |            |          |            |          |               |          |          |          |          |          |             |          |
| 2008-08-15 |            |          |            |          |               |          |          |          |          |          |             |          |
| 2008-08-16 |            |          |            |          |               |          |          |          |          |          |             |          |
| 2008-08-17 |            |          |            |          |               |          |          |          |          |          |             |          |
| 2008-08-18 |            |          |            |          |               |          |          |          |          |          |             |          |
| 2008-08-19 |            |          |            |          |               |          |          |          |          |          |             |          |
| 2008-08-20 |            |          |            |          |               |          |          |          |          |          |             |          |
| 2008-08-21 |            |          |            |          |               |          |          |          |          |          |             |          |
| 2008-08-22 |            |          |            |          |               |          |          |          |          |          |             |          |
| 2008-08-23 |            |          |            |          |               |          |          |          |          |          |             |          |
| 2008-08-24 |            |          |            |          |               |          |          |          |          |          |             |          |
| 2008-08-25 |            |          |            |          |               |          |          |          |          |          |             |          |
| 2008-08-26 |            |          |            |          |               |          |          |          |          |          |             |          |
| 2008-08-27 |            |          |            |          |               |          |          |          |          |          |             |          |
| 2008-08-28 |            |          |            |          |               |          |          |          |          |          |             |          |
| 2008-08-29 |            |          |            |          |               |          |          |          |          |          |             |          |
| 2008-08-30 |            |          |            |          |               |          |          |          |          |          |             |          |
| 2008-08-31 |            |          |            |          |               |          |          |          |          |          |             |          |
| 2008-09-01 |            |          |            |          |               |          |          |          |          |          |             |          |
| 2008-09-02 |            |          |            |          |               |          |          |          |          |          |             |          |
| 2008-09-03 |            |          |            |          |               |          |          |          |          |          |             |          |
| 2008-09-04 |            |          |            |          |               |          |          |          |          |          |             |          |
| 2008-09-05 |            |          |            |          |               |          |          |          |          |          |             |          |
| 2008-09-06 |            |          |            |          |               |          |          |          |          |          |             |          |
| 2008-09-07 |            |          |            |          |               |          |          |          |          |          |             |          |
| 2008-09-08 |            |          |            |          |               |          |          |          |          |          |             |          |
| 2008-09-09 |            |          |            |          |               |          |          |          |          |          |             |          |
| 2008-09-10 |            |          |            |          |               |          |          |          |          |          |             |          |
| 2008-09-11 |            |          |            |          |               |          |          |          |          |          |             |          |
| 2008-09-12 |            |          |            |          |               |          |          |          |          |          |             |          |
| 2008-09-13 |            |          |            |          |               |          |          |          |          |          |             |          |
| 2008-09-14 |            |          |            |          |               |          |          |          |          |          |             |          |
| 2008-09-15 |            |          |            |          |               |          |          |          |          |          |             |          |
| 2008-09-16 |            |          |            |          |               |          |          |          |          |          |             |          |
| 2008-09-17 |            |          |            |          |               |          |          |          |          |          |             |          |
| 2008-09-18 |            |          |            |          |               |          |          |          |          |          |             |          |
| 2008-09-19 |            |          |            |          |               |          |          |          |          |          |             |          |
| 2008-09-20 |            |          |            |          |               |          |          |          |          |          |             |          |
| 2008-09-21 |            |          |            |          |               |          |          |          |          |          |             |          |
| 2008-09-22 |            |          |            |          |               |          |          |          |          |          |             |          |
| 2008-09-23 |            |          |            |          |               |          |          |          |          |          |             |          |
| 2008-09-24 |            |          |            |          |               |          |          |          |          |          |             |          |
| 2008-09-25 |            |          |            |          |               |          |          |          |          |          |             |          |
| 2008-09-26 |            |          |            |          |               |          |          |          |          |          |             |          |
| 2008-09-27 |            |          |            |          |               |          |          |          |          |          |             |          |
| 2008-09-28 |            |          |            |          |               |          |          |          |          |          |             |          |
| 2008-09-29 |            |          |            |          |               |          |          |          |          |          |             |          |
| 2008-09-30 |            |          |            |          |               |          |          |          |          |          |             |          |

## Northwest

Category:  No Alert  Category 2  Category 1  Category 0

|            | Station    |          |            |          |               |          |          |          |          |          |             |          |
|------------|------------|----------|------------|----------|---------------|----------|----------|----------|----------|----------|-------------|----------|
|            | Forecast   | Observed | Forecast   | Observed | Forecast      | Observed | Forecast | Observed | Forecast | Observed | Forecast    | Observed |
|            | Dease Lake |          | Port Hardy |          | Prince Rupert |          | Sandspit |          | Terrace  |          | Watson Lake |          |
| Date       |            |          |            |          |               |          |          |          |          |          |             |          |
| 2009-05-01 |            |          |            |          |               |          |          |          |          |          |             |          |
| 2009-05-02 |            |          |            |          |               |          |          |          |          |          |             |          |
| 2009-05-03 |            |          |            |          |               |          |          |          |          |          |             |          |
| 2009-05-04 |            |          |            |          |               |          |          |          |          |          |             |          |
| 2009-05-05 |            |          |            |          |               |          |          |          |          |          |             |          |
| 2009-05-06 |            |          |            |          |               |          |          |          |          |          |             |          |
| 2009-05-07 |            |          |            |          |               |          |          |          |          |          |             |          |
| 2009-05-08 |            |          |            |          |               |          |          |          |          |          |             |          |
| 2009-05-09 |            |          |            |          |               |          |          |          |          |          |             |          |
| 2009-05-10 |            |          |            |          |               |          |          |          |          |          |             |          |
| 2009-05-11 |            |          |            |          |               |          |          |          |          |          |             |          |
| 2009-05-12 |            |          |            |          |               |          |          |          |          |          |             |          |
| 2009-05-13 |            |          |            |          |               |          |          |          |          |          |             |          |
| 2009-05-14 |            |          |            |          |               |          |          |          |          |          |             |          |
| 2009-05-15 |            |          |            |          |               |          |          |          |          |          |             |          |
| 2009-05-16 |            |          |            |          |               |          |          |          |          |          |             |          |
| 2009-05-17 |            |          |            |          |               |          |          |          |          |          |             |          |
| 2009-05-18 |            |          |            |          |               |          |          |          |          |          |             |          |
| 2009-05-19 |            |          |            |          |               |          |          |          |          |          |             |          |
| 2009-05-20 |            |          |            |          |               |          |          |          |          |          |             |          |
| 2009-05-21 |            |          |            |          |               |          |          |          |          |          |             |          |
| 2009-05-22 |            |          |            |          |               |          |          |          |          |          |             |          |
| 2009-05-23 |            |          |            |          |               |          |          |          |          |          |             |          |
| 2009-05-24 |            |          |            |          |               |          |          |          |          |          |             |          |
| 2009-05-25 |            |          |            |          |               |          |          |          |          |          |             |          |
| 2009-05-26 |            |          |            |          |               |          |          |          |          |          |             |          |
| 2009-05-27 |            |          |            |          |               |          |          |          |          |          |             |          |
| 2009-05-28 |            |          |            |          |               |          |          |          |          |          |             |          |
| 2009-05-29 |            |          |            |          |               |          |          |          |          |          |             |          |
| 2009-05-30 |            |          |            |          |               |          |          |          |          |          |             |          |
| 2009-05-31 |            |          |            |          |               |          |          |          |          |          |             |          |
| 2009-06-01 |            |          |            |          |               |          |          |          |          |          |             |          |
| 2009-06-02 |            |          |            |          |               |          |          |          |          |          |             |          |
| 2009-06-03 |            |          |            |          |               |          |          |          |          |          |             |          |
| 2009-06-04 |            |          |            |          |               |          |          |          |          |          |             |          |
| 2009-06-05 |            |          |            |          |               |          |          |          |          |          |             |          |
| 2009-06-06 |            |          |            |          |               |          |          |          |          |          |             |          |
| 2009-06-07 |            |          |            |          |               |          |          |          |          |          |             |          |
| 2009-06-08 |            |          |            |          |               |          |          |          |          |          |             |          |
| 2009-06-09 |            |          |            |          |               |          |          |          |          |          |             |          |
| 2009-06-10 |            |          |            |          |               |          |          |          |          |          |             |          |
| 2009-06-11 |            |          |            |          |               |          |          |          |          |          |             |          |
| 2009-06-12 |            |          |            |          |               |          |          |          |          |          |             |          |
| 2009-06-13 |            |          |            |          |               |          |          |          |          |          |             |          |
| 2009-06-14 |            |          |            |          |               |          |          |          |          |          |             |          |
| 2009-06-15 |            |          |            |          |               |          |          |          |          |          |             |          |
| 2009-06-16 |            |          |            |          |               |          |          |          |          |          |             |          |
| 2009-06-17 |            |          |            |          |               |          |          |          |          |          |             |          |
| 2009-06-18 |            |          |            |          |               |          |          |          |          |          |             |          |
| 2009-06-19 |            |          |            |          |               |          |          |          |          |          |             |          |
| 2009-06-20 |            |          |            |          |               |          |          |          |          |          |             |          |
| 2009-06-21 |            |          |            |          |               |          |          |          |          |          |             |          |
| 2009-06-22 |            |          |            |          |               |          |          |          |          |          |             |          |
| 2009-06-23 |            |          |            |          |               |          |          |          |          |          |             |          |
| 2009-06-24 |            |          |            |          |               |          |          |          |          |          |             |          |
| 2009-06-25 |            |          |            |          |               |          |          |          |          |          |             |          |
| 2009-06-26 |            |          |            |          |               |          |          |          |          |          |             |          |
| 2009-06-27 |            |          |            |          |               |          |          |          |          |          |             |          |
| 2009-06-28 |            |          |            |          |               |          |          |          |          |          |             |          |
| 2009-06-29 |            |          |            |          |               |          |          |          |          |          |             |          |
| 2009-06-30 |            |          |            |          |               |          |          |          |          |          |             |          |
| 2009-07-01 |            |          |            |          |               |          |          |          |          |          |             |          |
| 2009-07-02 |            |          |            |          |               |          |          |          |          |          |             |          |
| 2009-07-03 |            |          |            |          |               |          |          |          |          |          |             |          |
| 2009-07-04 |            |          |            |          |               |          |          |          |          |          |             |          |
| 2009-07-05 |            |          |            |          |               |          |          |          |          |          |             |          |
| 2009-07-06 |            |          |            |          |               |          |          |          |          |          |             |          |
| 2009-07-07 |            |          |            |          |               |          |          |          |          |          |             |          |
| 2009-07-08 |            |          |            |          |               |          |          |          |          |          |             |          |
| 2009-07-09 |            |          |            |          |               |          |          |          |          |          |             |          |
| 2009-07-10 |            |          |            |          |               |          |          |          |          |          |             |          |
| 2009-07-11 |            |          |            |          |               |          |          |          |          |          |             |          |
| 2009-07-12 |            |          |            |          |               |          |          |          |          |          |             |          |
| 2009-07-13 |            |          |            |          |               |          |          |          |          |          |             |          |
| 2009-07-14 |            |          |            |          |               |          |          |          |          |          |             |          |
| 2009-07-15 |            |          |            |          |               |          |          |          |          |          |             |          |
| 2009-07-16 |            |          |            |          |               |          |          |          |          |          |             |          |
| 2009-07-17 |            |          |            |          |               |          |          |          |          |          |             |          |
| 2009-07-18 |            |          |            |          |               |          |          |          |          |          |             |          |
| 2009-07-19 |            |          |            |          |               |          |          |          |          |          |             |          |
| 2009-07-20 |            |          |            |          |               |          |          |          |          |          |             |          |
| 2009-07-21 |            |          |            |          |               |          |          |          |          |          |             |          |
| 2009-07-22 |            |          |            |          |               |          |          |          |          |          |             |          |
| 2009-07-23 |            |          |            |          |               |          |          |          |          |          |             |          |
| 2009-07-24 |            |          |            |          |               |          |          |          |          |          |             |          |
| 2009-07-25 |            |          |            |          |               |          |          |          |          |          |             |          |
| 2009-07-26 |            |          |            |          |               |          |          |          |          |          |             |          |
| 2009-07-27 |            |          |            |          |               |          |          |          |          |          |             |          |
| 2009-07-28 |            |          |            |          |               |          |          |          |          |          |             |          |
| 2009-07-29 |            |          |            |          |               |          |          |          |          |          |             |          |
| 2009-07-30 |            |          |            |          |               |          |          |          |          |          |             |          |
| 2009-07-31 |            |          |            |          |               |          |          |          |          |          |             |          |
| 2009-08-01 |            |          |            |          |               |          |          |          |          |          |             |          |
| 2009-08-02 |            |          |            |          |               |          |          |          |          |          |             |          |
| 2009-08-03 |            |          |            |          |               |          |          |          |          |          |             |          |
| 2009-08-04 |            |          |            |          |               |          |          |          |          |          |             |          |
| 2009-08-05 |            |          |            |          |               |          |          |          |          |          |             |          |
| 2009-08-06 |            |          |            |          |               |          |          |          |          |          |             |          |
| 2009-08-07 |            |          |            |          |               |          |          |          |          |          |             |          |
| 2009-08-08 |            |          |            |          |               |          |          |          |          |          |             |          |
| 2009-08-09 |            |          |            |          |               |          |          |          |          |          |             |          |
| 2009-08-10 |            |          |            |          |               |          |          |          |          |          |             |          |
| 2009-08-11 |            |          |            |          |               |          |          |          |          |          |             |          |
| 2009-08-12 |            |          |            |          |               |          |          |          |          |          |             |          |
| 2009-08-13 |            |          |            |          |               |          |          |          |          |          |             |          |
| 2009-08-14 |            |          |            |          |               |          |          |          |          |          |             |          |
| 2009-08-15 |            |          |            |          |               |          |          |          |          |          |             |          |
| 2009-08-16 |            |          |            |          |               |          |          |          |          |          |             |          |
| 2009-08-17 |            |          |            |          |               |          |          |          |          |          |             |          |
| 2009-08-18 |            |          |            |          |               |          |          |          |          |          |             |          |
| 2009-08-19 |            |          |            |          |               |          |          |          |          |          |             |          |
| 2009-08-20 |            |          |            |          |               |          |          |          |          |          |             |          |
| 2009-08-21 |            |          |            |          |               |          |          |          |          |          |             |          |
| 2009-08-22 |            |          |            |          |               |          |          |          |          |          |             |          |
| 2009-08-23 |            |          |            |          |               |          |          |          |          |          |             |          |
| 2009-08-24 |            |          |            |          |               |          |          |          |          |          |             |          |
| 2009-08-25 |            |          |            |          |               |          |          |          |          |          |             |          |
| 2009-08-26 |            |          |            |          |               |          |          |          |          |          |             |          |
| 2009-08-27 |            |          |            |          |               |          |          |          |          |          |             |          |
| 2009-08-28 |            |          |            |          |               |          |          |          |          |          |             |          |
| 2009-08-29 |            |          |            |          |               |          |          |          |          |          |             |          |
| 2009-08-30 |            |          |            |          |               |          |          |          |          |          |             |          |
| 2009-08-31 |            |          |            |          |               |          |          |          |          |          |             |          |
| 2009-09-01 |            |          |            |          |               |          |          |          |          |          |             |          |
| 2009-09-02 |            |          |            |          |               |          |          |          |          |          |             |          |
| 2009-09-03 |            |          |            |          |               |          |          |          |          |          |             |          |
| 2009-09-04 |            |          |            |          |               |          |          |          |          |          |             |          |
| 2009-09-05 |            |          |            |          |               |          |          |          |          |          |             |          |
| 2009-09-06 |            |          |            |          |               |          |          |          |          |          |             |          |
| 2009-09-07 |            |          |            |          |               |          |          |          |          |          |             |          |
| 2009-09-08 |            |          |            |          |               |          |          |          |          |          |             |          |
| 2009-09-09 |            |          |            |          |               |          |          |          |          |          |             |          |
| 2009-09-10 |            |          |            |          |               |          |          |          |          |          |             |          |
| 2009-09-11 |            |          |            |          |               |          |          |          |          |          |             |          |
| 2009-09-12 |            |          |            |          |               |          |          |          |          |          |             |          |
| 2009-09-13 |            |          |            |          |               |          |          |          |          |          |             |          |
| 2009-09-14 |            |          |            |          |               |          |          |          |          |          |             |          |
| 2009-09-15 |            |          |            |          |               |          |          |          |          |          |             |          |
| 2009-09-16 |            |          |            |          |               |          |          |          |          |          |             |          |
| 2009-09-17 |            |          |            |          |               |          |          |          |          |          |             |          |
| 2009-09-18 |            |          |            |          |               |          |          |          |          |          |             |          |
| 2009-09-19 |            |          |            |          |               |          |          |          |          |          |             |          |
| 2009-09-20 |            |          |            |          |               |          |          |          |          |          |             |          |
| 2009-09-21 |            |          |            |          |               |          |          |          |          |          |             |          |
| 2009-09-22 |            |          |            |          |               |          |          |          |          |          |             |          |
| 2009-09-23 |            |          |            |          |               |          |          |          |          |          |             |          |
| 2009-09-24 |            |          |            |          |               |          |          |          |          |          |             |          |
| 2009-09-25 |            |          |            |          |               |          |          |          |          |          |             |          |
| 2009-09-26 |            |          |            |          |               |          |          |          |          |          |             |          |
| 2009-09-27 |            |          |            |          |               |          |          |          |          |          |             |          |
| 2009-09-28 |            |          |            |          |               |          |          |          |          |          |             |          |
| 2009-09-29 |            |          |            |          |               |          |          |          |          |          |             |          |
| 2009-09-30 |            |          |            |          |               |          |          |          |          |          |             |          |



## Northwest

Category:  No Alert  Category 2  Category 1  Category 0

|            | Station    |          |            |          |               |          |          |          |          |          |             |          |
|------------|------------|----------|------------|----------|---------------|----------|----------|----------|----------|----------|-------------|----------|
|            | Forecast   | Observed | Forecast   | Observed | Forecast      | Observed | Forecast | Observed | Forecast | Observed | Forecast    | Observed |
|            | Dease Lake |          | Port Hardy |          | Prince Rupert |          | Sandspit |          | Terrace  |          | Watson Lake |          |
| 2010-05-01 |            |          |            |          |               |          |          |          |          |          |             |          |
| 2010-05-02 |            |          |            |          |               |          |          |          |          |          |             |          |
| 2010-05-03 |            |          |            |          |               |          |          |          |          |          |             |          |
| 2010-05-04 |            |          |            |          |               |          |          |          |          |          |             |          |
| 2010-05-05 |            |          |            |          |               |          |          |          |          |          |             |          |
| 2010-05-06 |            |          |            |          |               |          |          |          |          |          |             |          |
| 2010-05-07 |            |          |            |          |               |          |          |          |          |          |             |          |
| 2010-05-08 |            |          |            |          |               |          |          |          |          |          |             |          |
| 2010-05-09 |            |          |            |          |               |          |          |          |          |          |             |          |
| 2010-05-10 |            |          |            |          |               |          |          |          |          |          |             |          |
| 2010-05-11 |            |          |            |          |               |          |          |          |          |          |             |          |
| 2010-05-12 |            |          |            |          |               |          |          |          |          |          |             |          |
| 2010-05-13 |            |          |            |          |               |          |          |          |          |          |             |          |
| 2010-05-14 |            |          |            |          |               |          |          |          |          |          |             |          |
| 2010-05-15 |            |          |            |          |               |          |          |          |          |          |             |          |
| 2010-05-16 |            |          |            |          |               |          |          |          |          |          |             |          |
| 2010-05-17 |            |          |            |          |               |          |          |          |          |          |             |          |
| 2010-05-18 |            |          |            |          |               |          |          |          |          |          |             |          |
| 2010-05-19 |            |          |            |          |               |          |          |          |          |          |             |          |
| 2010-05-20 |            |          |            |          |               |          |          |          |          |          |             |          |
| 2010-05-21 |            |          |            |          |               |          |          |          |          |          |             |          |
| 2010-05-22 |            |          |            |          |               |          |          |          |          |          |             |          |
| 2010-05-23 |            |          |            |          |               |          |          |          |          |          |             |          |
| 2010-05-24 |            |          |            |          |               |          |          |          |          |          |             |          |
| 2010-05-25 |            |          |            |          |               |          |          |          |          |          |             |          |
| 2010-05-26 |            |          |            |          |               |          |          |          |          |          |             |          |
| 2010-05-27 |            |          |            |          |               |          |          |          |          |          |             |          |
| 2010-05-28 |            |          |            |          |               |          |          |          |          |          |             |          |
| 2010-05-29 |            |          |            |          |               |          |          |          |          |          |             |          |
| 2010-05-30 |            |          |            |          |               |          |          |          |          |          |             |          |
| 2010-05-31 |            |          |            |          |               |          |          |          |          |          |             |          |
| 2010-06-01 |            |          |            |          |               |          |          |          |          |          |             |          |
| 2010-06-02 |            |          |            |          |               |          |          |          |          |          |             |          |
| 2010-06-03 |            |          |            |          |               |          |          |          |          |          |             |          |
| 2010-06-04 |            |          |            |          |               |          |          |          |          |          |             |          |
| 2010-06-05 |            |          |            |          |               |          |          |          |          |          |             |          |
| 2010-06-06 |            |          |            |          |               |          |          |          |          |          |             |          |
| 2010-06-07 |            |          |            |          |               |          |          |          |          |          |             |          |
| 2010-06-08 |            |          |            |          |               |          |          |          |          |          |             |          |
| 2010-06-09 |            |          |            |          |               |          |          |          |          |          |             |          |
| 2010-06-10 |            |          |            |          |               |          |          |          |          |          |             |          |
| 2010-06-11 |            |          |            |          |               |          |          |          |          |          |             |          |
| 2010-06-12 |            |          |            |          |               |          |          |          |          |          |             |          |
| 2010-06-13 |            |          |            |          |               |          |          |          |          |          |             |          |
| 2010-06-14 |            |          |            |          |               |          |          |          |          |          |             |          |
| 2010-06-15 |            |          |            |          |               |          |          |          |          |          |             |          |
| 2010-06-16 |            |          |            |          |               |          |          |          |          |          |             |          |
| 2010-06-17 |            |          |            |          |               |          |          |          |          |          |             |          |
| 2010-06-18 |            |          |            |          |               |          |          |          |          |          |             |          |
| 2010-06-19 |            |          |            |          |               |          |          |          |          |          |             |          |
| 2010-06-20 |            |          |            |          |               |          |          |          |          |          |             |          |
| 2010-06-21 |            |          |            |          |               |          |          |          |          |          |             |          |
| 2010-06-22 |            |          |            |          |               |          |          |          |          |          |             |          |
| 2010-06-23 |            |          |            |          |               |          |          |          |          |          |             |          |
| 2010-06-24 |            |          |            |          |               |          |          |          |          |          |             |          |
| 2010-06-25 |            |          |            |          |               |          |          |          |          |          |             |          |
| 2010-06-26 |            |          |            |          |               |          |          |          |          |          |             |          |
| 2010-06-27 |            |          |            |          |               |          |          |          |          |          |             |          |
| 2010-06-28 |            |          |            |          |               |          |          |          |          |          |             |          |
| 2010-06-29 |            |          |            |          |               |          |          |          |          |          |             |          |
| 2010-06-30 |            |          |            |          |               |          |          |          |          |          |             |          |
| 2010-07-01 |            |          |            |          |               |          |          |          |          |          |             |          |
| 2010-07-02 |            |          |            |          |               |          |          |          |          |          |             |          |
| 2010-07-03 |            |          |            |          |               |          |          |          |          |          |             |          |
| 2010-07-04 |            |          |            |          |               |          |          |          |          |          |             |          |
| 2010-07-05 |            |          |            |          |               |          |          |          |          |          |             |          |
| 2010-07-06 |            |          |            |          |               |          |          |          |          |          |             |          |
| 2010-07-07 |            |          |            |          |               |          |          |          |          |          |             |          |
| 2010-07-08 |            |          |            |          |               |          |          |          |          |          |             |          |
| 2010-07-09 |            |          |            |          |               |          |          |          |          |          |             |          |
| 2010-07-10 |            |          |            |          |               |          |          |          |          |          |             |          |
| 2010-07-11 |            |          |            |          |               |          |          |          |          |          |             |          |
| 2010-07-12 |            |          |            |          |               |          |          |          |          |          |             |          |
| 2010-07-13 |            |          |            |          |               |          |          |          |          |          |             |          |
| 2010-07-14 |            |          |            |          |               |          |          |          |          |          |             |          |
| 2010-07-15 |            |          |            |          |               |          |          |          |          |          |             |          |
| 2010-07-16 |            |          |            |          |               |          |          |          |          |          |             |          |
| 2010-07-17 |            |          |            |          |               |          |          |          |          |          |             |          |
| 2010-07-18 |            |          |            |          |               |          |          |          |          |          |             |          |
| 2010-07-19 |            |          |            |          |               |          |          |          |          |          |             |          |
| 2010-07-20 |            |          |            |          |               |          |          |          |          |          |             |          |
| 2010-07-21 |            |          |            |          |               |          |          |          |          |          |             |          |
| 2010-07-22 |            |          |            |          |               |          |          |          |          |          |             |          |
| 2010-07-23 |            |          |            |          |               |          |          |          |          |          |             |          |
| 2010-07-24 |            |          |            |          |               |          |          |          |          |          |             |          |
| 2010-07-25 |            |          |            |          |               |          |          |          |          |          |             |          |
| 2010-07-26 |            |          |            |          |               |          |          |          |          |          |             |          |
| 2010-07-27 |            |          |            |          |               |          |          |          |          |          |             |          |
| 2010-07-28 |            |          |            |          |               |          |          |          |          |          |             |          |
| 2010-07-29 |            |          |            |          |               |          |          |          |          |          |             |          |
| 2010-07-30 |            |          |            |          |               |          |          |          |          |          |             |          |
| 2010-07-31 |            |          |            |          |               |          |          |          |          |          |             |          |
| 2010-08-01 |            |          |            |          |               |          |          |          |          |          |             |          |
| 2010-08-02 |            |          |            |          |               |          |          |          |          |          |             |          |
| 2010-08-03 |            |          |            |          |               |          |          |          |          |          |             |          |
| 2010-08-04 |            |          |            |          |               |          |          |          |          |          |             |          |
| 2010-08-05 |            |          |            |          |               |          |          |          |          |          |             |          |
| 2010-08-06 |            |          |            |          |               |          |          |          |          |          |             |          |
| 2010-08-07 |            |          |            |          |               |          |          |          |          |          |             |          |
| 2010-08-08 |            |          |            |          |               |          |          |          |          |          |             |          |
| 2010-08-09 |            |          |            |          |               |          |          |          |          |          |             |          |
| 2010-08-10 |            |          |            |          |               |          |          |          |          |          |             |          |
| 2010-08-11 |            |          |            |          |               |          |          |          |          |          |             |          |
| 2010-08-12 |            |          |            |          |               |          |          |          |          |          |             |          |
| 2010-08-13 |            |          |            |          |               |          |          |          |          |          |             |          |
| 2010-08-14 |            |          |            |          |               |          |          |          |          |          |             |          |
| 2010-08-15 |            |          |            |          |               |          |          |          |          |          |             |          |
| 2010-08-16 |            |          |            |          |               |          |          |          |          |          |             |          |
| 2010-08-17 |            |          |            |          |               |          |          |          |          |          |             |          |
| 2010-08-18 |            |          |            |          |               |          |          |          |          |          |             |          |
| 2010-08-19 |            |          |            |          |               |          |          |          |          |          |             |          |
| 2010-08-20 |            |          |            |          |               |          |          |          |          |          |             |          |
| 2010-08-21 |            |          |            |          |               |          |          |          |          |          |             |          |
| 2010-08-22 |            |          |            |          |               |          |          |          |          |          |             |          |
| 2010-08-23 |            |          |            |          |               |          |          |          |          |          |             |          |
| 2010-08-24 |            |          |            |          |               |          |          |          |          |          |             |          |
| 2010-08-25 |            |          |            |          |               |          |          |          |          |          |             |          |
| 2010-08-26 |            |          |            |          |               |          |          |          |          |          |             |          |
| 2010-08-27 |            |          |            |          |               |          |          |          |          |          |             |          |
| 2010-08-28 |            |          |            |          |               |          |          |          |          |          |             |          |
| 2010-08-29 |            |          |            |          |               |          |          |          |          |          |             |          |
| 2010-08-30 |            |          |            |          |               |          |          |          |          |          |             |          |
| 2010-08-31 |            |          |            |          |               |          |          |          |          |          |             |          |
| 2010-09-01 |            |          |            |          |               |          |          |          |          |          |             |          |
| 2010-09-02 |            |          |            |          |               |          |          |          |          |          |             |          |
| 2010-09-03 |            |          |            |          |               |          |          |          |          |          |             |          |
| 2010-09-04 |            |          |            |          |               |          |          |          |          |          |             |          |
| 2010-09-05 |            |          |            |          |               |          |          |          |          |          |             |          |
| 2010-09-06 |            |          |            |          |               |          |          |          |          |          |             |          |
| 2010-09-07 |            |          |            |          |               |          |          |          |          |          |             |          |
| 2010-09-08 |            |          |            |          |               |          |          |          |          |          |             |          |
| 2010-09-09 |            |          |            |          |               |          |          |          |          |          |             |          |
| 2010-09-10 |            |          |            |          |               |          |          |          |          |          |             |          |
| 2010-09-11 |            |          |            |          |               |          |          |          |          |          |             |          |
| 2010-09-12 |            |          |            |          |               |          |          |          |          |          |             |          |
| 2010-09-13 |            |          |            |          |               |          |          |          |          |          |             |          |
| 2010-09-14 |            |          |            |          |               |          |          |          |          |          |             |          |
| 2010-09-15 |            |          |            |          |               |          |          |          |          |          |             |          |
| 2010-09-16 |            |          |            |          |               |          |          |          |          |          |             |          |
| 2010-09-17 |            |          |            |          |               |          |          |          |          |          |             |          |
| 2010-09-18 |            |          |            |          |               |          |          |          |          |          |             |          |
| 2010-09-19 |            |          |            |          |               |          |          |          |          |          |             |          |
| 2010-09-20 |            |          |            |          |               |          |          |          |          |          |             |          |
| 2010-09-21 |            |          |            |          |               |          |          |          |          |          |             |          |
| 2010-09-22 |            |          |            |          |               |          |          |          |          |          |             |          |
| 2010-09-23 |            |          |            |          |               |          |          |          |          |          |             |          |
| 2010-09-24 |            |          |            |          |               |          |          |          |          |          |             |          |
| 2010-09-25 |            |          |            |          |               |          |          |          |          |          |             |          |
| 2010-09-26 |            |          |            |          |               |          |          |          |          |          |             |          |
| 2010-09-27 |            |          |            |          |               |          |          |          |          |          |             |          |
| 2010-09-28 |            |          |            |          |               |          |          |          |          |          |             |          |
| 2010-09-29 |            |          |            |          |               |          |          |          |          |          |             |          |
| 2010-09-30 |            |          |            |          |               |          |          |          |          |          |             |          |

| Northwest                                                                                       |            |  |            |  |               |  |          |  |          |  |             |  |
|-------------------------------------------------------------------------------------------------|------------|--|------------|--|---------------|--|----------|--|----------|--|-------------|--|
| Category: <div>No Alert</div> <div>Category 2</div> <div>Category 1</div> <div>Category 0</div> |            |  |            |  |               |  |          |  |          |  |             |  |
| Date                                                                                            | Station    |  | Forecast   |  | Observed      |  | Forecast |  | Observed |  | Forecast    |  |
|                                                                                                 |            |  | Forecast   |  | Observed      |  | Forecast |  | Observed |  | Forecast    |  |
|                                                                                                 |            |  | Forecast   |  | Observed      |  | Forecast |  | Observed |  | Forecast    |  |
|                                                                                                 | Dease Lake |  | Port Hardy |  | Prince Rupert |  | Sandspit |  | Terrace  |  | Watson Lake |  |
| 2011-05-01                                                                                      |            |  |            |  |               |  |          |  |          |  |             |  |
| 2011-05-02                                                                                      |            |  |            |  |               |  |          |  |          |  |             |  |
| 2011-05-03                                                                                      |            |  |            |  |               |  |          |  |          |  |             |  |
| 2011-05-04                                                                                      |            |  |            |  |               |  |          |  |          |  |             |  |
| 2011-05-05                                                                                      |            |  |            |  |               |  |          |  |          |  |             |  |
| 2011-05-06                                                                                      |            |  |            |  |               |  |          |  |          |  |             |  |
| 2011-05-07                                                                                      |            |  |            |  |               |  |          |  |          |  |             |  |
| 2011-05-08                                                                                      |            |  |            |  |               |  |          |  |          |  |             |  |
| 2011-05-09                                                                                      |            |  |            |  |               |  |          |  |          |  |             |  |
| 2011-05-10                                                                                      |            |  |            |  |               |  |          |  |          |  |             |  |
| 2011-05-11                                                                                      |            |  |            |  |               |  |          |  |          |  |             |  |
| 2011-05-12                                                                                      |            |  |            |  |               |  |          |  |          |  |             |  |
| 2011-05-13                                                                                      |            |  |            |  |               |  |          |  |          |  |             |  |
| 2011-05-14                                                                                      |            |  |            |  |               |  |          |  |          |  |             |  |
| 2011-05-15                                                                                      |            |  |            |  |               |  |          |  |          |  |             |  |
| 2011-05-16                                                                                      |            |  |            |  |               |  |          |  |          |  |             |  |
| 2011-05-17                                                                                      |            |  |            |  |               |  |          |  |          |  |             |  |
| 2011-05-18                                                                                      |            |  |            |  |               |  |          |  |          |  |             |  |
| 2011-05-19                                                                                      |            |  |            |  |               |  |          |  |          |  |             |  |
| 2011-05-20                                                                                      |            |  |            |  |               |  |          |  |          |  |             |  |
| 2011-05-21                                                                                      |            |  |            |  |               |  |          |  |          |  |             |  |
| 2011-05-22                                                                                      |            |  |            |  |               |  |          |  |          |  |             |  |
| 2011-05-23                                                                                      |            |  |            |  |               |  |          |  |          |  |             |  |
| 2011-05-24                                                                                      |            |  |            |  |               |  |          |  |          |  |             |  |
| 2011-05-25                                                                                      |            |  |            |  |               |  |          |  |          |  |             |  |
| 2011-05-26                                                                                      |            |  |            |  |               |  |          |  |          |  |             |  |
| 2011-05-27                                                                                      |            |  |            |  |               |  |          |  |          |  |             |  |
| 2011-05-28                                                                                      |            |  |            |  |               |  |          |  |          |  |             |  |
| 2011-05-29                                                                                      |            |  |            |  |               |  |          |  |          |  |             |  |
| 2011-05-30                                                                                      |            |  |            |  |               |  |          |  |          |  |             |  |
| 2011-05-31                                                                                      |            |  |            |  |               |  |          |  |          |  |             |  |
| 2011-06-01                                                                                      |            |  |            |  |               |  |          |  |          |  |             |  |
| 2011-06-02                                                                                      |            |  |            |  |               |  |          |  |          |  |             |  |
| 2011-06-03                                                                                      |            |  |            |  |               |  |          |  |          |  |             |  |
| 2011-06-04                                                                                      |            |  |            |  |               |  |          |  |          |  |             |  |
| 2011-06-05                                                                                      |            |  |            |  |               |  |          |  |          |  |             |  |
| 2011-06-06                                                                                      |            |  |            |  |               |  |          |  |          |  |             |  |
| 2011-06-07                                                                                      |            |  |            |  |               |  |          |  |          |  |             |  |
| 2011-06-08                                                                                      |            |  |            |  |               |  |          |  |          |  |             |  |
| 2011-06-09                                                                                      |            |  |            |  |               |  |          |  |          |  |             |  |
| 2011-06-10                                                                                      |            |  |            |  |               |  |          |  |          |  |             |  |
| 2011-06-11                                                                                      |            |  |            |  |               |  |          |  |          |  |             |  |
| 2011-06-12                                                                                      |            |  |            |  |               |  |          |  |          |  |             |  |
| 2011-06-13                                                                                      |            |  |            |  |               |  |          |  |          |  |             |  |
| 2011-06-14                                                                                      |            |  |            |  |               |  |          |  |          |  |             |  |
| 2011-06-15                                                                                      |            |  |            |  |               |  |          |  |          |  |             |  |
| 2011-06-16                                                                                      |            |  |            |  |               |  |          |  |          |  |             |  |
| 2011-06-17                                                                                      |            |  |            |  |               |  |          |  |          |  |             |  |
| 2011-06-18                                                                                      |            |  |            |  |               |  |          |  |          |  |             |  |
| 2011-06-19                                                                                      |            |  |            |  |               |  |          |  |          |  |             |  |
| 2011-06-20                                                                                      |            |  |            |  |               |  |          |  |          |  |             |  |
| 2011-06-21                                                                                      |            |  |            |  |               |  |          |  |          |  |             |  |
| 2011-06-22                                                                                      |            |  |            |  |               |  |          |  |          |  |             |  |
| 2011-06-23                                                                                      |            |  |            |  |               |  |          |  |          |  |             |  |
| 2011-06-24                                                                                      |            |  |            |  |               |  |          |  |          |  |             |  |
| 2011-06-25                                                                                      |            |  |            |  |               |  |          |  |          |  |             |  |
| 2011-06-26                                                                                      |            |  |            |  |               |  |          |  |          |  |             |  |
| 2011-06-27                                                                                      |            |  |            |  |               |  |          |  |          |  |             |  |
| 2011-06-28                                                                                      |            |  |            |  |               |  |          |  |          |  |             |  |
| 2011-06-29                                                                                      |            |  |            |  |               |  |          |  |          |  |             |  |
| 2011-06-30                                                                                      |            |  |            |  |               |  |          |  |          |  |             |  |
| 2011-07-01                                                                                      |            |  |            |  |               |  |          |  |          |  |             |  |
| 2011-07-02                                                                                      |            |  |            |  |               |  |          |  |          |  |             |  |
| 2011-07-03                                                                                      |            |  |            |  |               |  |          |  |          |  |             |  |
| 2011-07-04                                                                                      |            |  |            |  |               |  |          |  |          |  |             |  |
| 2011-07-05                                                                                      |            |  |            |  |               |  |          |  |          |  |             |  |
| 2011-07-06                                                                                      |            |  |            |  |               |  |          |  |          |  |             |  |
| 2011-07-07                                                                                      |            |  |            |  |               |  |          |  |          |  |             |  |
| 2011-07-08                                                                                      |            |  |            |  |               |  |          |  |          |  |             |  |
| 2011-07-09                                                                                      |            |  |            |  |               |  |          |  |          |  |             |  |
| 2011-07-10                                                                                      |            |  |            |  |               |  |          |  |          |  |             |  |
| 2011-07-11                                                                                      |            |  |            |  |               |  |          |  |          |  |             |  |
| 2011-07-12                                                                                      |            |  |            |  |               |  |          |  |          |  |             |  |
| 2011-07-13                                                                                      |            |  |            |  |               |  |          |  |          |  |             |  |
| 2011-07-14                                                                                      |            |  |            |  |               |  |          |  |          |  |             |  |
| 2011-07-15                                                                                      |            |  |            |  |               |  |          |  |          |  |             |  |



## Northwest

Category:  No Alert  Category 2  Category 1  Category 0

|            | Station    |          |            |          |               |          |          |          |          |          |             |          |
|------------|------------|----------|------------|----------|---------------|----------|----------|----------|----------|----------|-------------|----------|
|            | Forecast   | Observed | Forecast   | Observed | Forecast      | Observed | Forecast | Observed | Forecast | Observed | Forecast    | Observed |
|            | Dease Lake |          | Port Hardy |          | Prince Rupert |          | Sandspit |          | Terrace  |          | Watson Lake |          |
| 2012-05-01 |            |          |            |          |               |          |          |          |          |          |             |          |
| 2012-05-02 |            |          |            |          |               |          |          |          |          |          |             |          |
| 2012-05-03 |            |          |            |          |               |          |          |          |          |          |             |          |
| 2012-05-04 |            |          |            |          |               |          |          |          |          |          |             |          |
| 2012-05-05 |            |          |            |          |               |          |          |          |          |          |             |          |
| 2012-05-06 |            |          |            |          |               |          |          |          |          |          |             |          |
| 2012-05-07 |            |          |            |          |               |          |          |          |          |          |             |          |
| 2012-05-08 |            |          |            |          |               |          |          |          |          |          |             |          |
| 2012-05-09 |            |          |            |          |               |          |          |          |          |          |             |          |
| 2012-05-10 |            |          |            |          |               |          |          |          |          |          |             |          |
| 2012-05-11 |            |          |            |          |               |          |          |          |          |          |             |          |
| 2012-05-12 |            |          |            |          |               |          |          |          |          |          |             |          |
| 2012-05-13 |            |          |            |          |               |          |          |          |          |          |             |          |
| 2012-05-14 |            |          |            |          |               |          |          |          |          |          |             |          |
| 2012-05-15 |            |          |            |          |               |          |          |          |          |          |             |          |
| 2012-05-16 |            |          |            |          |               |          |          |          |          |          |             |          |
| 2012-05-17 |            |          |            |          |               |          |          |          |          |          |             |          |
| 2012-05-18 |            |          |            |          |               |          |          |          |          |          |             |          |
| 2012-05-19 |            |          |            |          |               |          |          |          |          |          |             |          |
| 2012-05-20 |            |          |            |          |               |          |          |          |          |          |             |          |
| 2012-05-21 |            |          |            |          |               |          |          |          |          |          |             |          |
| 2012-05-22 |            |          |            |          |               |          |          |          |          |          |             |          |
| 2012-05-23 |            |          |            |          |               |          |          |          |          |          |             |          |
| 2012-05-24 |            |          |            |          |               |          |          |          |          |          |             |          |
| 2012-05-25 |            |          |            |          |               |          |          |          |          |          |             |          |
| 2012-05-26 |            |          |            |          |               |          |          |          |          |          |             |          |
| 2012-05-27 |            |          |            |          |               |          |          |          |          |          |             |          |
| 2012-05-28 |            |          |            |          |               |          |          |          |          |          |             |          |
| 2012-05-29 |            |          |            |          |               |          |          |          |          |          |             |          |
| 2012-05-30 |            |          |            |          |               |          |          |          |          |          |             |          |
| 2012-05-31 |            |          |            |          |               |          |          |          |          |          |             |          |
| 2012-06-01 |            |          |            |          |               |          |          |          |          |          |             |          |
| 2012-06-02 |            |          |            |          |               |          |          |          |          |          |             |          |
| 2012-06-03 |            |          |            |          |               |          |          |          |          |          |             |          |
| 2012-06-04 |            |          |            |          |               |          |          |          |          |          |             |          |
| 2012-06-05 |            |          |            |          |               |          |          |          |          |          |             |          |
| 2012-06-06 |            |          |            |          |               |          |          |          |          |          |             |          |
| 2012-06-07 |            |          |            |          |               |          |          |          |          |          |             |          |
| 2012-06-08 |            |          |            |          |               |          |          |          |          |          |             |          |
| 2012-06-09 |            |          |            |          |               |          |          |          |          |          |             |          |
| 2012-06-10 |            |          |            |          |               |          |          |          |          |          |             |          |
| 2012-06-11 |            |          |            |          |               |          |          |          |          |          |             |          |
| 2012-06-12 |            |          |            |          |               |          |          |          |          |          |             |          |
| 2012-06-13 |            |          |            |          |               |          |          |          |          |          |             |          |
| 2012-06-14 |            |          |            |          |               |          |          |          |          |          |             |          |
| 2012-06-15 |            |          |            |          |               |          |          |          |          |          |             |          |
| 2012-06-16 |            |          |            |          |               |          |          |          |          |          |             |          |
| 2012-06-17 |            |          |            |          |               |          |          |          |          |          |             |          |
| 2012-06-18 |            |          |            |          |               |          |          |          |          |          |             |          |
| 2012-06-19 |            |          |            |          |               |          |          |          |          |          |             |          |
| 2012-06-20 |            |          |            |          |               |          |          |          |          |          |             |          |
| 2012-06-21 |            |          |            |          |               |          |          |          |          |          |             |          |
| 2012-06-22 |            |          |            |          |               |          |          |          |          |          |             |          |
| 2012-06-23 |            |          |            |          |               |          |          |          |          |          |             |          |
| 2012-06-24 |            |          |            |          |               |          |          |          |          |          |             |          |
| 2012-06-25 |            |          |            |          |               |          |          |          |          |          |             |          |
| 2012-06-26 |            |          |            |          |               |          |          |          |          |          |             |          |
| 2012-06-27 |            |          |            |          |               |          |          |          |          |          |             |          |
| 2012-06-28 |            |          |            |          |               |          |          |          |          |          |             |          |
| 2012-06-29 |            |          |            |          |               |          |          |          |          |          |             |          |
| 2012-06-30 |            |          |            |          |               |          |          |          |          |          |             |          |
| 2012-07-01 |            |          |            |          |               |          |          |          |          |          |             |          |
| 2012-07-02 |            |          |            |          |               |          |          |          |          |          |             |          |
| 2012-07-03 |            |          |            |          |               |          |          |          |          |          |             |          |
| 2012-07-04 |            |          |            |          |               |          |          |          |          |          |             |          |
| 2012-07-05 |            |          |            |          |               |          |          |          |          |          |             |          |
| 2012-07-06 |            |          |            |          |               |          |          |          |          |          |             |          |
| 2012-07-07 |            |          |            |          |               |          |          |          |          |          |             |          |
| 2012-07-08 |            |          |            |          |               |          |          |          |          |          |             |          |
| 2012-07-09 |            |          |            |          |               |          |          |          |          |          |             |          |
| 2012-07-10 |            |          |            |          |               |          |          |          |          |          |             |          |
| 2012-07-11 |            |          |            |          |               |          |          |          |          |          |             |          |
| 2012-07-12 |            |          |            |          |               |          |          |          |          |          |             |          |
| 2012-07-13 |            |          |            |          |               |          |          |          |          |          |             |          |
| 2012-07-14 |            |          |            |          |               |          |          |          |          |          |             |          |
| 2012-07-15 |            |          |            |          |               |          |          |          |          |          |             |          |
| 2012-07-16 |            |          |            |          |               |          |          |          |          |          |             |          |
| 2012-07-17 |            |          |            |          |               |          |          |          |          |          |             |          |
| 2012-07-18 |            |          |            |          |               |          |          |          |          |          |             |          |
| 2012-07-19 |            |          |            |          |               |          |          |          |          |          |             |          |
| 2012-07-20 |            |          |            |          |               |          |          |          |          |          |             |          |
| 2012-07-21 |            |          |            |          |               |          |          |          |          |          |             |          |
| 2012-07-22 |            |          |            |          |               |          |          |          |          |          |             |          |
| 2012-07-23 |            |          |            |          |               |          |          |          |          |          |             |          |
| 2012-07-24 |            |          |            |          |               |          |          |          |          |          |             |          |
| 2012-07-25 |            |          |            |          |               |          |          |          |          |          |             |          |
| 2012-07-26 |            |          |            |          |               |          |          |          |          |          |             |          |
| 2012-07-27 |            |          |            |          |               |          |          |          |          |          |             |          |
| 2012-07-28 |            |          |            |          |               |          |          |          |          |          |             |          |
| 2012-07-29 |            |          |            |          |               |          |          |          |          |          |             |          |
| 2012-07-30 |            |          |            |          |               |          |          |          |          |          |             |          |
| 2012-07-31 |            |          |            |          |               |          |          |          |          |          |             |          |
| 2012-08-01 |            |          |            |          |               |          |          |          |          |          |             |          |
| 2012-08-02 |            |          |            |          |               |          |          |          |          |          |             |          |
| 2012-08-03 |            |          |            |          |               |          |          |          |          |          |             |          |
| 2012-08-04 |            |          |            |          |               |          |          |          |          |          |             |          |
| 2012-08-05 |            |          |            |          |               |          |          |          |          |          |             |          |
| 2012-08-06 |            |          |            |          |               |          |          |          |          |          |             |          |
| 2012-08-07 |            |          |            |          |               |          |          |          |          |          |             |          |
| 2012-08-08 |            |          |            |          |               |          |          |          |          |          |             |          |
| 2012-08-09 |            |          |            |          |               |          |          |          |          |          |             |          |
| 2012-08-10 |            |          |            |          |               |          |          |          |          |          |             |          |
| 2012-08-11 |            |          |            |          |               |          |          |          |          |          |             |          |
| 2012-08-12 |            |          |            |          |               |          |          |          |          |          |             |          |
| 2012-08-13 |            |          |            |          |               |          |          |          |          |          |             |          |
| 2012-08-14 |            |          |            |          |               |          |          |          |          |          |             |          |
| 2012-08-15 |            |          |            |          |               |          |          |          |          |          |             |          |
| 2012-08-16 |            |          |            |          |               |          |          |          |          |          |             |          |
| 2012-08-17 |            |          |            |          |               |          |          |          |          |          |             |          |
| 2012-08-18 |            |          |            |          |               |          |          |          |          |          |             |          |
| 2012-08-19 |            |          |            |          |               |          |          |          |          |          |             |          |
| 2012-08-20 |            |          |            |          |               |          |          |          |          |          |             |          |
| 2012-08-21 |            |          |            |          |               |          |          |          |          |          |             |          |
| 2012-08-22 |            |          |            |          |               |          |          |          |          |          |             |          |
| 2012-08-23 |            |          |            |          |               |          |          |          |          |          |             |          |
| 2012-08-24 |            |          |            |          |               |          |          |          |          |          |             |          |
| 2012-08-25 |            |          |            |          |               |          |          |          |          |          |             |          |
| 2012-08-26 |            |          |            |          |               |          |          |          |          |          |             |          |
| 2012-08-27 |            |          |            |          |               |          |          |          |          |          |             |          |
| 2012-08-28 |            |          |            |          |               |          |          |          |          |          |             |          |
| 2012-08-29 |            |          |            |          |               |          |          |          |          |          |             |          |
| 2012-08-30 |            |          |            |          |               |          |          |          |          |          |             |          |
| 2012-08-31 |            |          |            |          |               |          |          |          |          |          |             |          |
| 2012-09-01 |            |          |            |          |               |          |          |          |          |          |             |          |
| 2012-09-02 |            |          |            |          |               |          |          |          |          |          |             |          |
| 2012-09-03 |            |          |            |          |               |          |          |          |          |          |             |          |
| 2012-09-04 |            |          |            |          |               |          |          |          |          |          |             |          |
| 2012-09-05 |            |          |            |          |               |          |          |          |          |          |             |          |
| 2012-09-06 |            |          |            |          |               |          |          |          |          |          |             |          |
| 2012-09-07 |            |          |            |          |               |          |          |          |          |          |             |          |
| 2012-09-08 |            |          |            |          |               |          |          |          |          |          |             |          |
| 2012-09-09 |            |          |            |          |               |          |          |          |          |          |             |          |
| 2012-09-10 |            |          |            |          |               |          |          |          |          |          |             |          |
| 2012-09-11 |            |          |            |          |               |          |          |          |          |          |             |          |
| 2012-09-12 |            |          |            |          |               |          |          |          |          |          |             |          |
| 2012-09-13 |            |          |            |          |               |          |          |          |          |          |             |          |
| 2012-09-14 |            |          |            |          |               |          |          |          |          |          |             |          |
| 2012-09-15 |            |          |            |          |               |          |          |          |          |          |             |          |
| 2012-09-16 |            |          |            |          |               |          |          |          |          |          |             |          |
| 2012-09-17 |            |          |            |          |               |          |          |          |          |          |             |          |
| 2012-09-18 |            |          |            |          |               |          |          |          |          |          |             |          |
| 2012-09-19 |            |          |            |          |               |          |          |          |          |          |             |          |
| 2012-09-20 |            |          |            |          |               |          |          |          |          |          |             |          |
| 2012-09-21 |            |          |            |          |               |          |          |          |          |          |             |          |
| 2012-09-22 |            |          |            |          |               |          |          |          |          |          |             |          |
| 2012-09-23 |            |          |            |          |               |          |          |          |          |          |             |          |
| 2012-09-24 |            |          |            |          |               |          |          |          |          |          |             |          |
| 2012-09-25 |            |          |            |          |               |          |          |          |          |          |             |          |
| 2012-09-26 |            |          |            |          |               |          |          |          |          |          |             |          |
| 2012-09-27 |            |          |            |          |               |          |          |          |          |          |             |          |
| 2012-09-28 |            |          |            |          |               |          |          |          |          |          |             |          |
| 2012-09-29 |            |          |            |          |               |          |          |          |          |          |             |          |
| 2012-09-30 |            |          |            |          |               |          |          |          |          |          |             |          |







## Northwest

Category:  No Alert  Category 2  Category 1  Category 0

Station

|      | Forecast | Observed |
|------|----------|----------|
| Q1   | 0.78     | 0.69     |
| Q2   | 0.75     | 0.75     |
| Q3   | 0.72     | 0.72     |
| Q4   | 0.70     | 0.70     |
| Q5   | 0.68     | 0.68     |
| Q6   | 0.65     | 0.65     |
| Q7   | 0.62     | 0.62     |
| Q8   | 0.60     | 0.60     |
| Q9   | 0.58     | 0.58     |
| Q10  | 0.55     | 0.55     |
| Q11  | 0.52     | 0.52     |
| Q12  | 0.50     | 0.50     |
| Q13  | 0.48     | 0.48     |
| Q14  | 0.45     | 0.45     |
| Q15  | 0.42     | 0.42     |
| Q16  | 0.40     | 0.40     |
| Q17  | 0.38     | 0.38     |
| Q18  | 0.35     | 0.35     |
| Q19  | 0.32     | 0.32     |
| Q20  | 0.30     | 0.30     |
| Q21  | 0.28     | 0.28     |
| Q22  | 0.25     | 0.25     |
| Q23  | 0.22     | 0.22     |
| Q24  | 0.20     | 0.20     |
| Q25  | 0.18     | 0.18     |
| Q26  | 0.15     | 0.15     |
| Q27  | 0.12     | 0.12     |
| Q28  | 0.10     | 0.10     |
| Q29  | 0.08     | 0.08     |
| Q30  | 0.05     | 0.05     |
| Q31  | 0.02     | 0.02     |
| Q32  | 0.00     | 0.00     |
| Q33  | -0.02    | -0.02    |
| Q34  | -0.05    | -0.05    |
| Q35  | -0.08    | -0.08    |
| Q36  | -0.10    | -0.10    |
| Q37  | -0.12    | -0.12    |
| Q38  | -0.15    | -0.15    |
| Q39  | -0.18    | -0.18    |
| Q40  | -0.20    | -0.20    |
| Q41  | -0.22    | -0.22    |
| Q42  | -0.25    | -0.25    |
| Q43  | -0.28    | -0.28    |
| Q44  | -0.30    | -0.30    |
| Q45  | -0.32    | -0.32    |
| Q46  | -0.35    | -0.35    |
| Q47  | -0.38    | -0.38    |
| Q48  | -0.40    | -0.40    |
| Q49  | -0.42    | -0.42    |
| Q50  | -0.45    | -0.45    |
| Q51  | -0.48    | -0.48    |
| Q52  | -0.50    | -0.50    |
| Q53  | -0.52    | -0.52    |
| Q54  | -0.55    | -0.55    |
| Q55  | -0.58    | -0.58    |
| Q56  | -0.60    | -0.60    |
| Q57  | -0.62    | -0.62    |
| Q58  | -0.65    | -0.65    |
| Q59  | -0.68    | -0.68    |
| Q60  | -0.70    | -0.70    |
| Q61  | -0.72    | -0.72    |
| Q62  | -0.75    | -0.75    |
| Q63  | -0.78    | -0.78    |
| Q64  | -0.80    | -0.80    |
| Q65  | -0.82    | -0.82    |
| Q66  | -0.85    | -0.85    |
| Q67  | -0.88    | -0.88    |
| Q68  | -0.90    | -0.90    |
| Q69  | -0.92    | -0.92    |
| Q70  | -0.95    | -0.95    |
| Q71  | -0.98    | -0.98    |
| Q72  | -1.00    | -1.00    |
| Q73  | -0.98    | -0.98    |
| Q74  | -0.95    | -0.95    |
| Q75  | -0.92    | -0.92    |
| Q76  | -0.88    | -0.88    |
| Q77  | -0.85    | -0.85    |
| Q78  | -0.82    | -0.82    |
| Q79  | -0.78    | -0.78    |
| Q80  | -0.75    | -0.75    |
| Q81  | -0.72    | -0.72    |
| Q82  | -0.68    | -0.68    |
| Q83  | -0.65    | -0.65    |
| Q84  | -0.62    | -0.62    |
| Q85  | -0.58    | -0.58    |
| Q86  | -0.55    | -0.55    |
| Q87  | -0.52    | -0.52    |
| Q88  | -0.50    | -0.50    |
| Q89  | -0.48    | -0.48    |
| Q90  | -0.45    | -0.45    |
| Q91  | -0.42    | -0.42    |
| Q92  | -0.40    | -0.40    |
| Q93  | -0.38    | -0.38    |
| Q94  | -0.35    | -0.35    |
| Q95  | -0.32    | -0.32    |
| Q96  | -0.30    | -0.30    |
| Q97  | -0.28    | -0.28    |
| Q98  | -0.25    | -0.25    |
| Q99  | -0.22    | -0.22    |
| Q100 | -0.20    | -0.20    |

|         | Forecast | Observed |
|---------|----------|----------|
| Q1-2017 | 68.9     | 68.9     |
| Q2-2017 | 68.9     | 68.9     |
| Q3-2017 | 68.9     | 68.9     |
| Q4-2017 | 68.9     | 68.9     |
| Q1-2018 | 68.9     | 68.9     |
| Q2-2018 | 68.9     | 68.9     |
| Q3-2018 | 68.9     | 68.9     |
| Q4-2018 | 68.9     | 68.9     |
| Q1-2019 | 68.9     | 68.9     |
| Q2-2019 | 68.9     | 68.9     |
| Q3-2019 | 68.9     | 68.9     |
| Q4-2019 | 68.9     | 68.9     |
| Q1-2020 | 68.9     | 68.9     |
| Q2-2020 | 68.9     | 68.9     |
| Q3-2020 | 68.9     | 68.9     |
| Q4-2020 | 68.9     | 68.9     |
| Q1-2021 | 68.9     | 68.9     |
| Q2-2021 | 68.9     | 68.9     |
| Q3-2021 | 68.9     | 68.9     |
| Q4-2021 | 68.9     | 68.9     |
| Q1-2022 | 68.9     | 68.9     |
| Q2-2022 | 68.9     | 68.9     |
| Q3-2022 | 68.9     | 68.9     |
| Q4-2022 | 68.9     | 68.9     |
| Q1-2023 | 68.9     | 68.9     |
| Q2-2023 | 68.9     | 68.9     |
| Q3-2023 | 68.9     | 68.9     |
| Q4-2023 | 68.9     | 68.9     |
| Q1-2024 | 68.9     | 68.9     |
| Q2-2024 | 68.9     | 68.9     |
| Q3-2024 | 68.9     | 68.9     |
| Q4-2024 | 68.9     | 68.9     |
| Q1-2025 | 68.9     | 68.9     |
| Q2-2025 | 68.9     | 68.9     |
| Q3-2025 | 68.9     | 68.9     |
| Q4-2025 | 68.9     | 68.9     |
| Q1-2026 | 68.9     | 68.9     |
| Q2-2026 | 68.9     | 68.9     |
| Q3-2026 | 68.9     | 68.9     |
| Q4-2026 | 68.9     | 68.9     |
| Q1-2027 | 68.9     | 68.9     |
| Q2-2027 | 68.9     | 68.9     |
| Q3-2027 | 68.9     | 68.9     |
| Q4-2027 | 68.9     | 68.9     |
| Q1-2028 | 68.9     | 68.9     |
| Q2-2028 | 68.9     | 68.9     |
| Q3-2028 | 68.9     | 68.9     |
| Q4-2028 | 68.9     | 68.9     |
| Q1-2029 | 68.9     | 68.9     |
| Q2-2029 | 68.9     | 68.9     |
| Q3-2029 | 68.9     | 68.9     |
| Q4-2029 | 68.9     | 68.9     |
| Q1-2030 | 68.9     | 68.9     |
| Q2-2030 | 68.9     | 68.9     |
| Q3-2030 | 68.9     | 68.9     |
| Q4-2030 | 68.9     | 68.9     |
| Q1-2031 | 68.9     | 68.9     |
| Q2-2031 | 68.9     | 68.9     |
| Q3-2031 | 68.9     | 68.9     |
| Q4-2031 | 68.9     | 68.9     |
| Q1-2032 | 68.9     | 68.9     |
| Q2-2032 | 68.9     | 68.9     |
| Q3-2032 | 68.9     | 68.9     |
| Q4-2032 | 68.9     | 68.9     |
| Q1-2033 | 68.9     | 68.9     |
| Q2-2033 | 68.9     | 68.9     |
| Q3-2033 | 68.9     | 68.9     |
| Q4-2033 | 68.9     | 68.9     |
| Q1-2034 | 68.9     | 68.9     |
| Q2-2034 | 68.9     | 68.9     |
| Q3-2034 | 68.9     | 68.9     |
| Q4-2034 | 68.9     | 68.9     |
| Q1-2035 | 68.9     | 68.9     |
| Q2-2035 | 68.9     | 68.9     |
| Q3-2035 | 68.9     | 68.9     |
| Q4-2035 | 68.9     | 68.9     |
| Q1-2036 | 68.9     | 68.9     |
| Q2-2036 | 68.9     | 68.9     |
| Q3-2036 | 68.9     | 68.9     |
| Q4-2036 | 68.9     | 68.9     |
| Q1-2037 | 68.9     | 68.9     |
| Q2-2037 | 68.9     | 68.9     |
| Q3-2037 | 68.9     | 68.9     |
| Q4-2037 | 68.9     | 68.9     |
| Q1-2038 | 68.9     | 68.9     |
| Q2-2038 | 68.9     | 68.9     |
| Q3-2038 | 68.9     | 68.9     |
| Q4-2038 | 68.9     | 68.9     |
| Q1-2039 | 68.9     | 68.9     |
| Q2-2039 | 68.9     | 68.9     |
| Q3-2039 | 68.9     | 68.9     |
| Q4-2039 | 68.9     | 68.9     |
| Q1-2040 | 68.9     | 68.9     |
| Q2-2040 | 68.9     | 68.9     |
| Q3-2040 | 68.9     | 68.9     |
| Q4-2040 | 68.9     | 68.9     |
| Q1-2041 | 68.9     | 68.9     |
| Q2-2041 | 68.9     | 68.9     |
| Q3-2041 | 68.9     | 68.9     |
| Q4-2041 | 68.9     | 68.9     |
| Q1-2042 | 68.9     | 68.9     |
| Q2-2042 | 68.9     | 68.9     |
| Q3-2042 | 68.9     | 68.9     |
| Q4-2042 | 68.9     | 68.9     |
| Q1-2043 | 68.9     | 68.9     |
| Q2-2043 | 68.9     | 68.9     |
| Q3-2043 | 68.9     | 68.9     |
| Q4-2043 | 68.9     | 68.9     |
| Q1-2044 | 68.9     | 68.9     |
| Q2-2044 | 68.9     | 68.9     |
| Q3-2044 | 68.9     | 68.9     |
| Q4-2044 | 68.9     | 68.9     |
| Q1-2045 | 68.9     |          |

|      | Forecast | Observed |
|------|----------|----------|
| Q1   | 0.78     | 0.69     |
| Q2   | 0.75     | 0.75     |
| Q3   | 0.72     | 0.72     |
| Q4   | 0.70     | 0.70     |
| Q5   | 0.68     | 0.68     |
| Q6   | 0.65     | 0.65     |
| Q7   | 0.62     | 0.62     |
| Q8   | 0.60     | 0.60     |
| Q9   | 0.58     | 0.58     |
| Q10  | 0.55     | 0.55     |
| Q11  | 0.52     | 0.52     |
| Q12  | 0.50     | 0.50     |
| Q13  | 0.48     | 0.48     |
| Q14  | 0.45     | 0.45     |
| Q15  | 0.42     | 0.42     |
| Q16  | 0.40     | 0.40     |
| Q17  | 0.38     | 0.38     |
| Q18  | 0.35     | 0.35     |
| Q19  | 0.32     | 0.32     |
| Q20  | 0.30     | 0.30     |
| Q21  | 0.28     | 0.28     |
| Q22  | 0.25     | 0.25     |
| Q23  | 0.22     | 0.22     |
| Q24  | 0.20     | 0.20     |
| Q25  | 0.18     | 0.18     |
| Q26  | 0.15     | 0.15     |
| Q27  | 0.12     | 0.12     |
| Q28  | 0.10     | 0.10     |
| Q29  | 0.08     | 0.08     |
| Q30  | 0.05     | 0.05     |
| Q31  | 0.02     | 0.02     |
| Q32  | 0.00     | 0.00     |
| Q33  | -0.02    | -0.02    |
| Q34  | -0.05    | -0.05    |
| Q35  | -0.08    | -0.08    |
| Q36  | -0.10    | -0.10    |
| Q37  | -0.12    | -0.12    |
| Q38  | -0.15    | -0.15    |
| Q39  | -0.18    | -0.18    |
| Q40  | -0.20    | -0.20    |
| Q41  | -0.22    | -0.22    |
| Q42  | -0.25    | -0.25    |
| Q43  | -0.28    | -0.28    |
| Q44  | -0.30    | -0.30    |
| Q45  | -0.32    | -0.32    |
| Q46  | -0.35    | -0.35    |
| Q47  | -0.38    | -0.38    |
| Q48  | -0.40    | -0.40    |
| Q49  | -0.42    | -0.42    |
| Q50  | -0.45    | -0.45    |
| Q51  | -0.48    | -0.48    |
| Q52  | -0.50    | -0.50    |
| Q53  | -0.52    | -0.52    |
| Q54  | -0.55    | -0.55    |
| Q55  | -0.58    | -0.58    |
| Q56  | -0.60    | -0.60    |
| Q57  | -0.62    | -0.62    |
| Q58  | -0.65    | -0.65    |
| Q59  | -0.68    | -0.68    |
| Q60  | -0.70    | -0.70    |
| Q61  | -0.72    | -0.72    |
| Q62  | -0.75    | -0.75    |
| Q63  | -0.78    | -0.78    |
| Q64  | -0.80    | -0.80    |
| Q65  | -0.82    | -0.82    |
| Q66  | -0.85    | -0.85    |
| Q67  | -0.88    | -0.88    |
| Q68  | -0.90    | -0.90    |
| Q69  | -0.92    | -0.92    |
| Q70  | -0.95    | -0.95    |
| Q71  | -0.98    | -0.98    |
| Q72  | -1.00    | -1.00    |
| Q73  | -0.98    | -0.98    |
| Q74  | -0.95    | -0.95    |
| Q75  | -0.92    | -0.92    |
| Q76  | -0.88    | -0.88    |
| Q77  | -0.85    | -0.85    |
| Q78  | -0.82    | -0.82    |
| Q79  | -0.78    | -0.78    |
| Q80  | -0.75    | -0.75    |
| Q81  | -0.72    | -0.72    |
| Q82  | -0.68    | -0.68    |
| Q83  | -0.65    | -0.65    |
| Q84  | -0.62    | -0.62    |
| Q85  | -0.58    | -0.58    |
| Q86  | -0.55    | -0.55    |
| Q87  | -0.52    | -0.52    |
| Q88  | -0.50    | -0.50    |
| Q89  | -0.48    | -0.48    |
| Q90  | -0.45    | -0.45    |
| Q91  | -0.42    | -0.42    |
| Q92  | -0.40    | -0.40    |
| Q93  | -0.38    | -0.38    |
| Q94  | -0.35    | -0.35    |
| Q95  | -0.32    | -0.32    |
| Q96  | -0.30    | -0.30    |
| Q97  | -0.28    | -0.28    |
| Q98  | -0.25    | -0.25    |
| Q99  | -0.22    | -0.22    |
| Q100 | -0.20    | -0.20    |

|      | Forecast | Observed |
|------|----------|----------|
| Q1   | 0.78     | 0.69     |
| Q2   | 0.78     | 0.78     |
| Q3   | 0.78     | 0.78     |
| Q4   | 0.78     | 0.78     |
| Q5   | 0.78     | 0.78     |
| Q6   | 0.78     | 0.78     |
| Q7   | 0.78     | 0.78     |
| Q8   | 0.78     | 0.78     |
| Q9   | 0.78     | 0.78     |
| Q10  | 0.78     | 0.78     |
| Q11  | 0.78     | 0.78     |
| Q12  | 0.78     | 0.78     |
| Q13  | 0.78     | 0.78     |
| Q14  | 0.78     | 0.78     |
| Q15  | 0.78     | 0.78     |
| Q16  | 0.78     | 0.78     |
| Q17  | 0.78     | 0.78     |
| Q18  | 0.78     | 0.78     |
| Q19  | 0.78     | 0.78     |
| Q20  | 0.78     | 0.78     |
| Q21  | 0.78     | 0.78     |
| Q22  | 0.78     | 0.78     |
| Q23  | 0.78     | 0.78     |
| Q24  | 0.78     | 0.78     |
| Q25  | 0.78     | 0.78     |
| Q26  | 0.78     | 0.78     |
| Q27  | 0.78     | 0.78     |
| Q28  | 0.78     | 0.78     |
| Q29  | 0.78     | 0.78     |
| Q30  | 0.78     | 0.78     |
| Q31  | 0.78     | 0.78     |
| Q32  | 0.78     | 0.78     |
| Q33  | 0.78     | 0.78     |
| Q34  | 0.78     | 0.78     |
| Q35  | 0.78     | 0.78     |
| Q36  | 0.78     | 0.78     |
| Q37  | 0.78     | 0.78     |
| Q38  | 0.78     | 0.78     |
| Q39  | 0.78     | 0.78     |
| Q40  | 0.78     | 0.78     |
| Q41  | 0.78     | 0.78     |
| Q42  | 0.78     | 0.78     |
| Q43  | 0.78     | 0.78     |
| Q44  | 0.78     | 0.78     |
| Q45  | 0.78     | 0.78     |
| Q46  | 0.78     | 0.78     |
| Q47  | 0.78     | 0.78     |
| Q48  | 0.78     | 0.78     |
| Q49  | 0.78     | 0.78     |
| Q50  | 0.78     | 0.78     |
| Q51  | 0.78     | 0.78     |
| Q52  | 0.78     | 0.78     |
| Q53  | 0.78     | 0.78     |
| Q54  | 0.78     | 0.78     |
| Q55  | 0.78     | 0.78     |
| Q56  | 0.78     | 0.78     |
| Q57  | 0.78     | 0.78     |
| Q58  | 0.78     | 0.78     |
| Q59  | 0.78     | 0.78     |
| Q60  | 0.78     | 0.78     |
| Q61  | 0.78     | 0.78     |
| Q62  | 0.78     | 0.78     |
| Q63  | 0.78     | 0.78     |
| Q64  | 0.78     | 0.78     |
| Q65  | 0.78     | 0.78     |
| Q66  | 0.78     | 0.78     |
| Q67  | 0.78     | 0.78     |
| Q68  | 0.78     | 0.78     |
| Q69  | 0.78     | 0.78     |
| Q70  | 0.78     | 0.78     |
| Q71  | 0.78     | 0.78     |
| Q72  | 0.78     | 0.78     |
| Q73  | 0.78     | 0.78     |
| Q74  | 0.78     | 0.78     |
| Q75  | 0.78     | 0.78     |
| Q76  | 0.78     | 0.78     |
| Q77  | 0.78     | 0.78     |
| Q78  | 0.78     | 0.78     |
| Q79  | 0.78     | 0.78     |
| Q80  | 0.78     | 0.78     |
| Q81  | 0.78     | 0.78     |
| Q82  | 0.78     | 0.78     |
| Q83  | 0.78     | 0.78     |
| Q84  | 0.78     | 0.78     |
| Q85  | 0.78     | 0.78     |
| Q86  | 0.78     | 0.78     |
| Q87  | 0.78     | 0.78     |
| Q88  | 0.78     | 0.78     |
| Q89  | 0.78     | 0.78     |
| Q90  | 0.78     | 0.78     |
| Q91  | 0.78     | 0.78     |
| Q92  | 0.78     | 0.78     |
| Q93  | 0.78     | 0.78     |
| Q94  | 0.78     | 0.78     |
| Q95  | 0.78     | 0.78     |
| Q96  | 0.78     | 0.78     |
| Q97  | 0.78     | 0.78     |
| Q98  | 0.78     | 0.78     |
| Q99  | 0.78     | 0.78     |
| Q100 | 0.78     | 0.78     |

[illegible]

Forecast Observed

Dease Lake

Port Hardy

Prince Rupert

Sandspit

Terrace

Watson La

|            |  |  |  |  |  |  |
|------------|--|--|--|--|--|--|
| 2016-05-01 |  |  |  |  |  |  |
| 2016-05-02 |  |  |  |  |  |  |
| 2016-05-03 |  |  |  |  |  |  |
| 2016-05-04 |  |  |  |  |  |  |
| 2016-05-05 |  |  |  |  |  |  |
| 2016-05-06 |  |  |  |  |  |  |
| 2016-05-07 |  |  |  |  |  |  |
| 2016-05-08 |  |  |  |  |  |  |
| 2016-05-09 |  |  |  |  |  |  |
| 2016-05-10 |  |  |  |  |  |  |
| 2016-05-11 |  |  |  |  |  |  |
| 2016-05-12 |  |  |  |  |  |  |
| 2016-05-13 |  |  |  |  |  |  |
| 2016-05-14 |  |  |  |  |  |  |
| 2016-05-15 |  |  |  |  |  |  |
| 2016-05-16 |  |  |  |  |  |  |
| 2016-05-17 |  |  |  |  |  |  |
| 2016-05-18 |  |  |  |  |  |  |
| 2016-05-19 |  |  |  |  |  |  |
| 2016-05-20 |  |  |  |  |  |  |
| 2016-05-21 |  |  |  |  |  |  |
| 2016-05-22 |  |  |  |  |  |  |
| 2016-05-23 |  |  |  |  |  |  |
| 2016-05-24 |  |  |  |  |  |  |
| 2016-05-25 |  |  |  |  |  |  |
| 2016-05-26 |  |  |  |  |  |  |
| 2016-05-27 |  |  |  |  |  |  |
| 2016-05-28 |  |  |  |  |  |  |
| 2016-05-29 |  |  |  |  |  |  |
| 2016-05-30 |  |  |  |  |  |  |
| 2016-05-31 |  |  |  |  |  |  |
| 2016-06-01 |  |  |  |  |  |  |
| 2016-06-02 |  |  |  |  |  |  |
| 2016-06-03 |  |  |  |  |  |  |
| 2016-06-04 |  |  |  |  |  |  |
| 2016-06-05 |  |  |  |  |  |  |
| 2016-06-06 |  |  |  |  |  |  |
| 2016-06-07 |  |  |  |  |  |  |
| 2016-06-08 |  |  |  |  |  |  |
| 2016-06-09 |  |  |  |  |  |  |
| 2016-06-10 |  |  |  |  |  |  |
| 2016-06-11 |  |  |  |  |  |  |
| 2016-06-12 |  |  |  |  |  |  |
| 2016-06-13 |  |  |  |  |  |  |
| 2016-06-14 |  |  |  |  |  |  |
| 2016-06-15 |  |  |  |  |  |  |
| 2016-06-16 |  |  |  |  |  |  |
| 2016-06-17 |  |  |  |  |  |  |
| 2016-06-18 |  |  |  |  |  |  |
| 2016-06-19 |  |  |  |  |  |  |
| 2016-06-20 |  |  |  |  |  |  |
| 2016-06-21 |  |  |  |  |  |  |
| 2016-06-22 |  |  |  |  |  |  |
| 2016-06-23 |  |  |  |  |  |  |
| 2016-06-24 |  |  |  |  |  |  |
| 2016-06-25 |  |  |  |  |  |  |
| 2016-06-26 |  |  |  |  |  |  |
| 2016-06-27 |  |  |  |  |  |  |
| 2016-06-28 |  |  |  |  |  |  |
| 2016-06-29 |  |  |  |  |  |  |
| 2016-06-30 |  |  |  |  |  |  |
| 2016-07-01 |  |  |  |  |  |  |
| 2016-07-02 |  |  |  |  |  |  |
| 2016-07-03 |  |  |  |  |  |  |
| 2016-07-04 |  |  |  |  |  |  |
| 2016-07-05 |  |  |  |  |  |  |
| 2016-07-06 |  |  |  |  |  |  |
| 2016-07-07 |  |  |  |  |  |  |
| 2016-07-08 |  |  |  |  |  |  |
| 2016-07-09 |  |  |  |  |  |  |
| 2016-07-10 |  |  |  |  |  |  |
| 2016-07-11 |  |  |  |  |  |  |
| 2016-07-12 |  |  |  |  |  |  |
| 2016-07-13 |  |  |  |  |  |  |
| 2016-07-14 |  |  |  |  |  |  |
| 2016-07-15 |  |  |  |  |  |  |
| 2016-07-16 |  |  |  |  |  |  |
| 2016-07-17 |  |  |  |  |  |  |
| 2016-07-18 |  |  |  |  |  |  |
| 2016-07-19 |  |  |  |  |  |  |
| 2016-07-20 |  |  |  |  |  |  |
| 2016-07-21 |  |  |  |  |  |  |
| 2016-07-22 |  |  |  |  |  |  |
| 2016-07-23 |  |  |  |  |  |  |
| 2016-07-24 |  |  |  |  |  |  |
| 2016-07-25 |  |  |  |  |  |  |
| 2016-07-26 |  |  |  |  |  |  |
| 2016-07-27 |  |  |  |  |  |  |
| 2016-07-28 |  |  |  |  |  |  |
| 2016-07-29 |  |  |  |  |  |  |
| 2016-07-30 |  |  |  |  |  |  |
| 2016-07-31 |  |  |  |  |  |  |
| 2016-08-01 |  |  |  |  |  |  |
| 2016-08-02 |  |  |  |  |  |  |
| 2016-08-03 |  |  |  |  |  |  |
| 2016-      |  |  |  |  |  |  |

Date \_\_\_\_\_
