# Supplementary material for: Establishing Heat Alert Thresholds for the Varied Climatic Regions of British Columbia, Canada
Source: MDPI journal article supplement (doi:10.3390/ijerph15092048), 2018-09-19
Supplement: s1 [file s1]

## Southeast

Category: ☐ No Alert ☐ Category 2 ☐ Category 1 ☐ Category 0

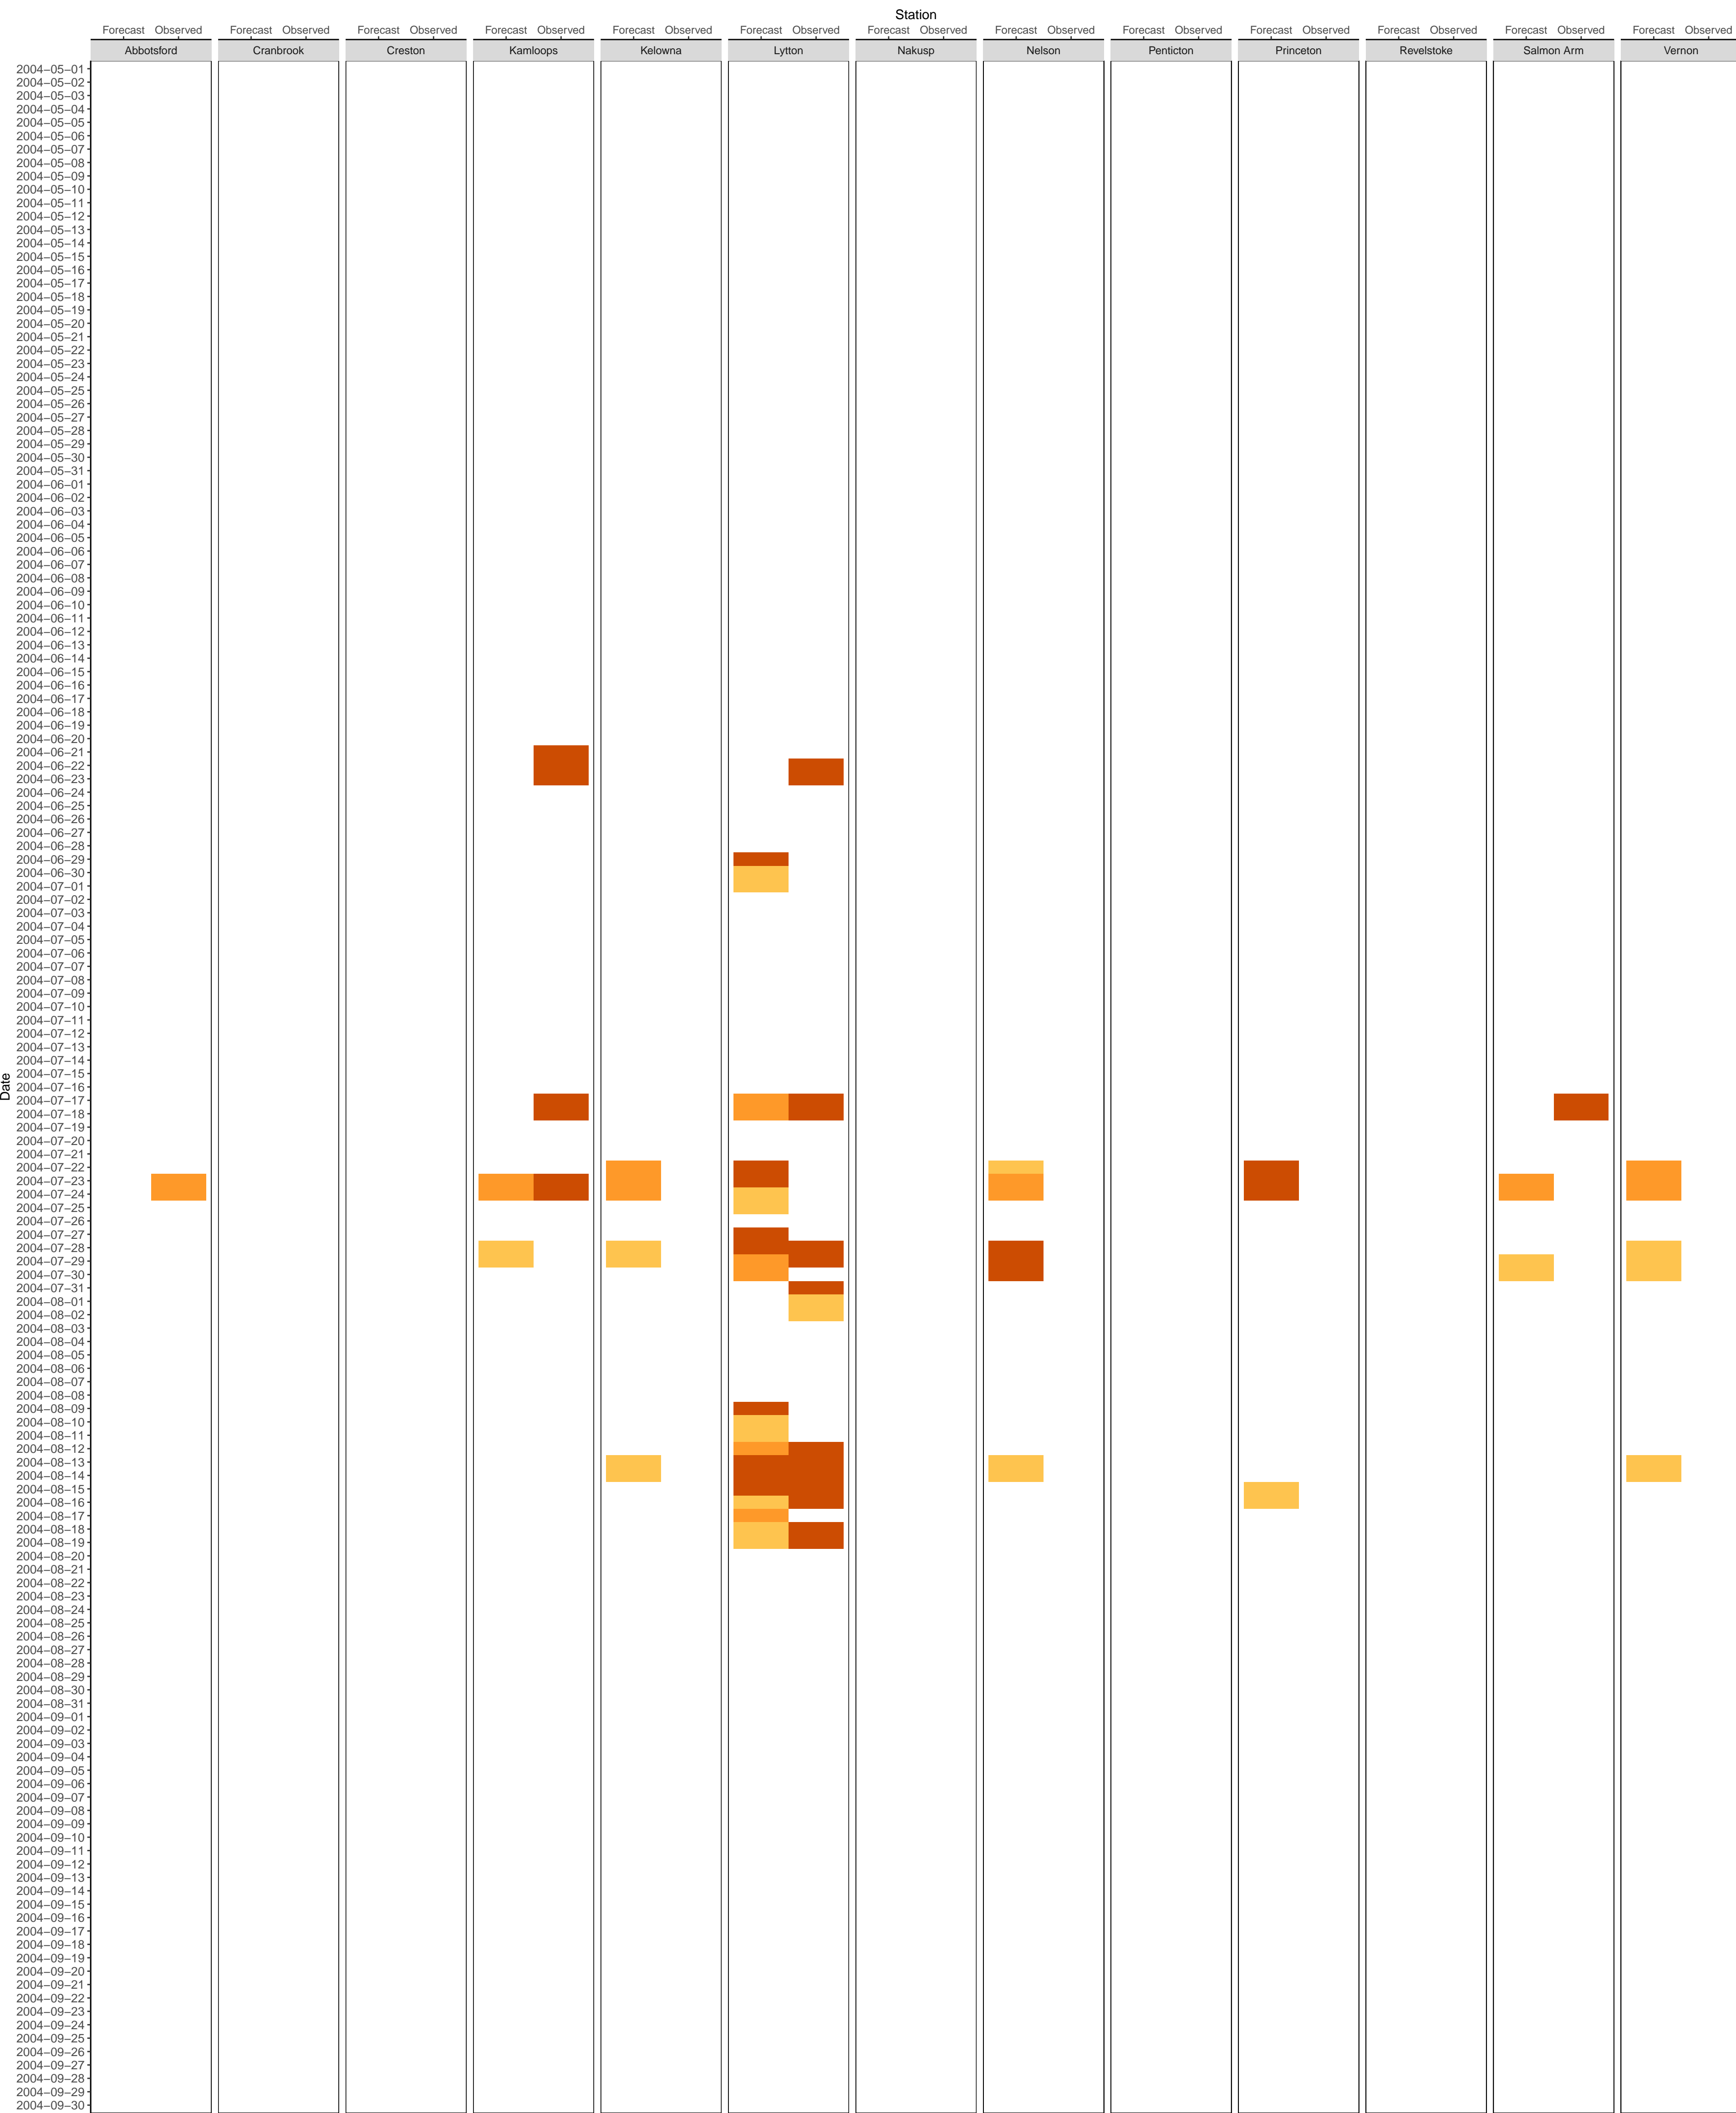

## Southeast

Category: ☐ No Alert ☐ Category 2 ☐ Category 1 ☐ Category 0

[illegible]

## Southeast

Category: ☐ No Alert ☐ Category 2 ☐ Category 1 ☐ Category 0

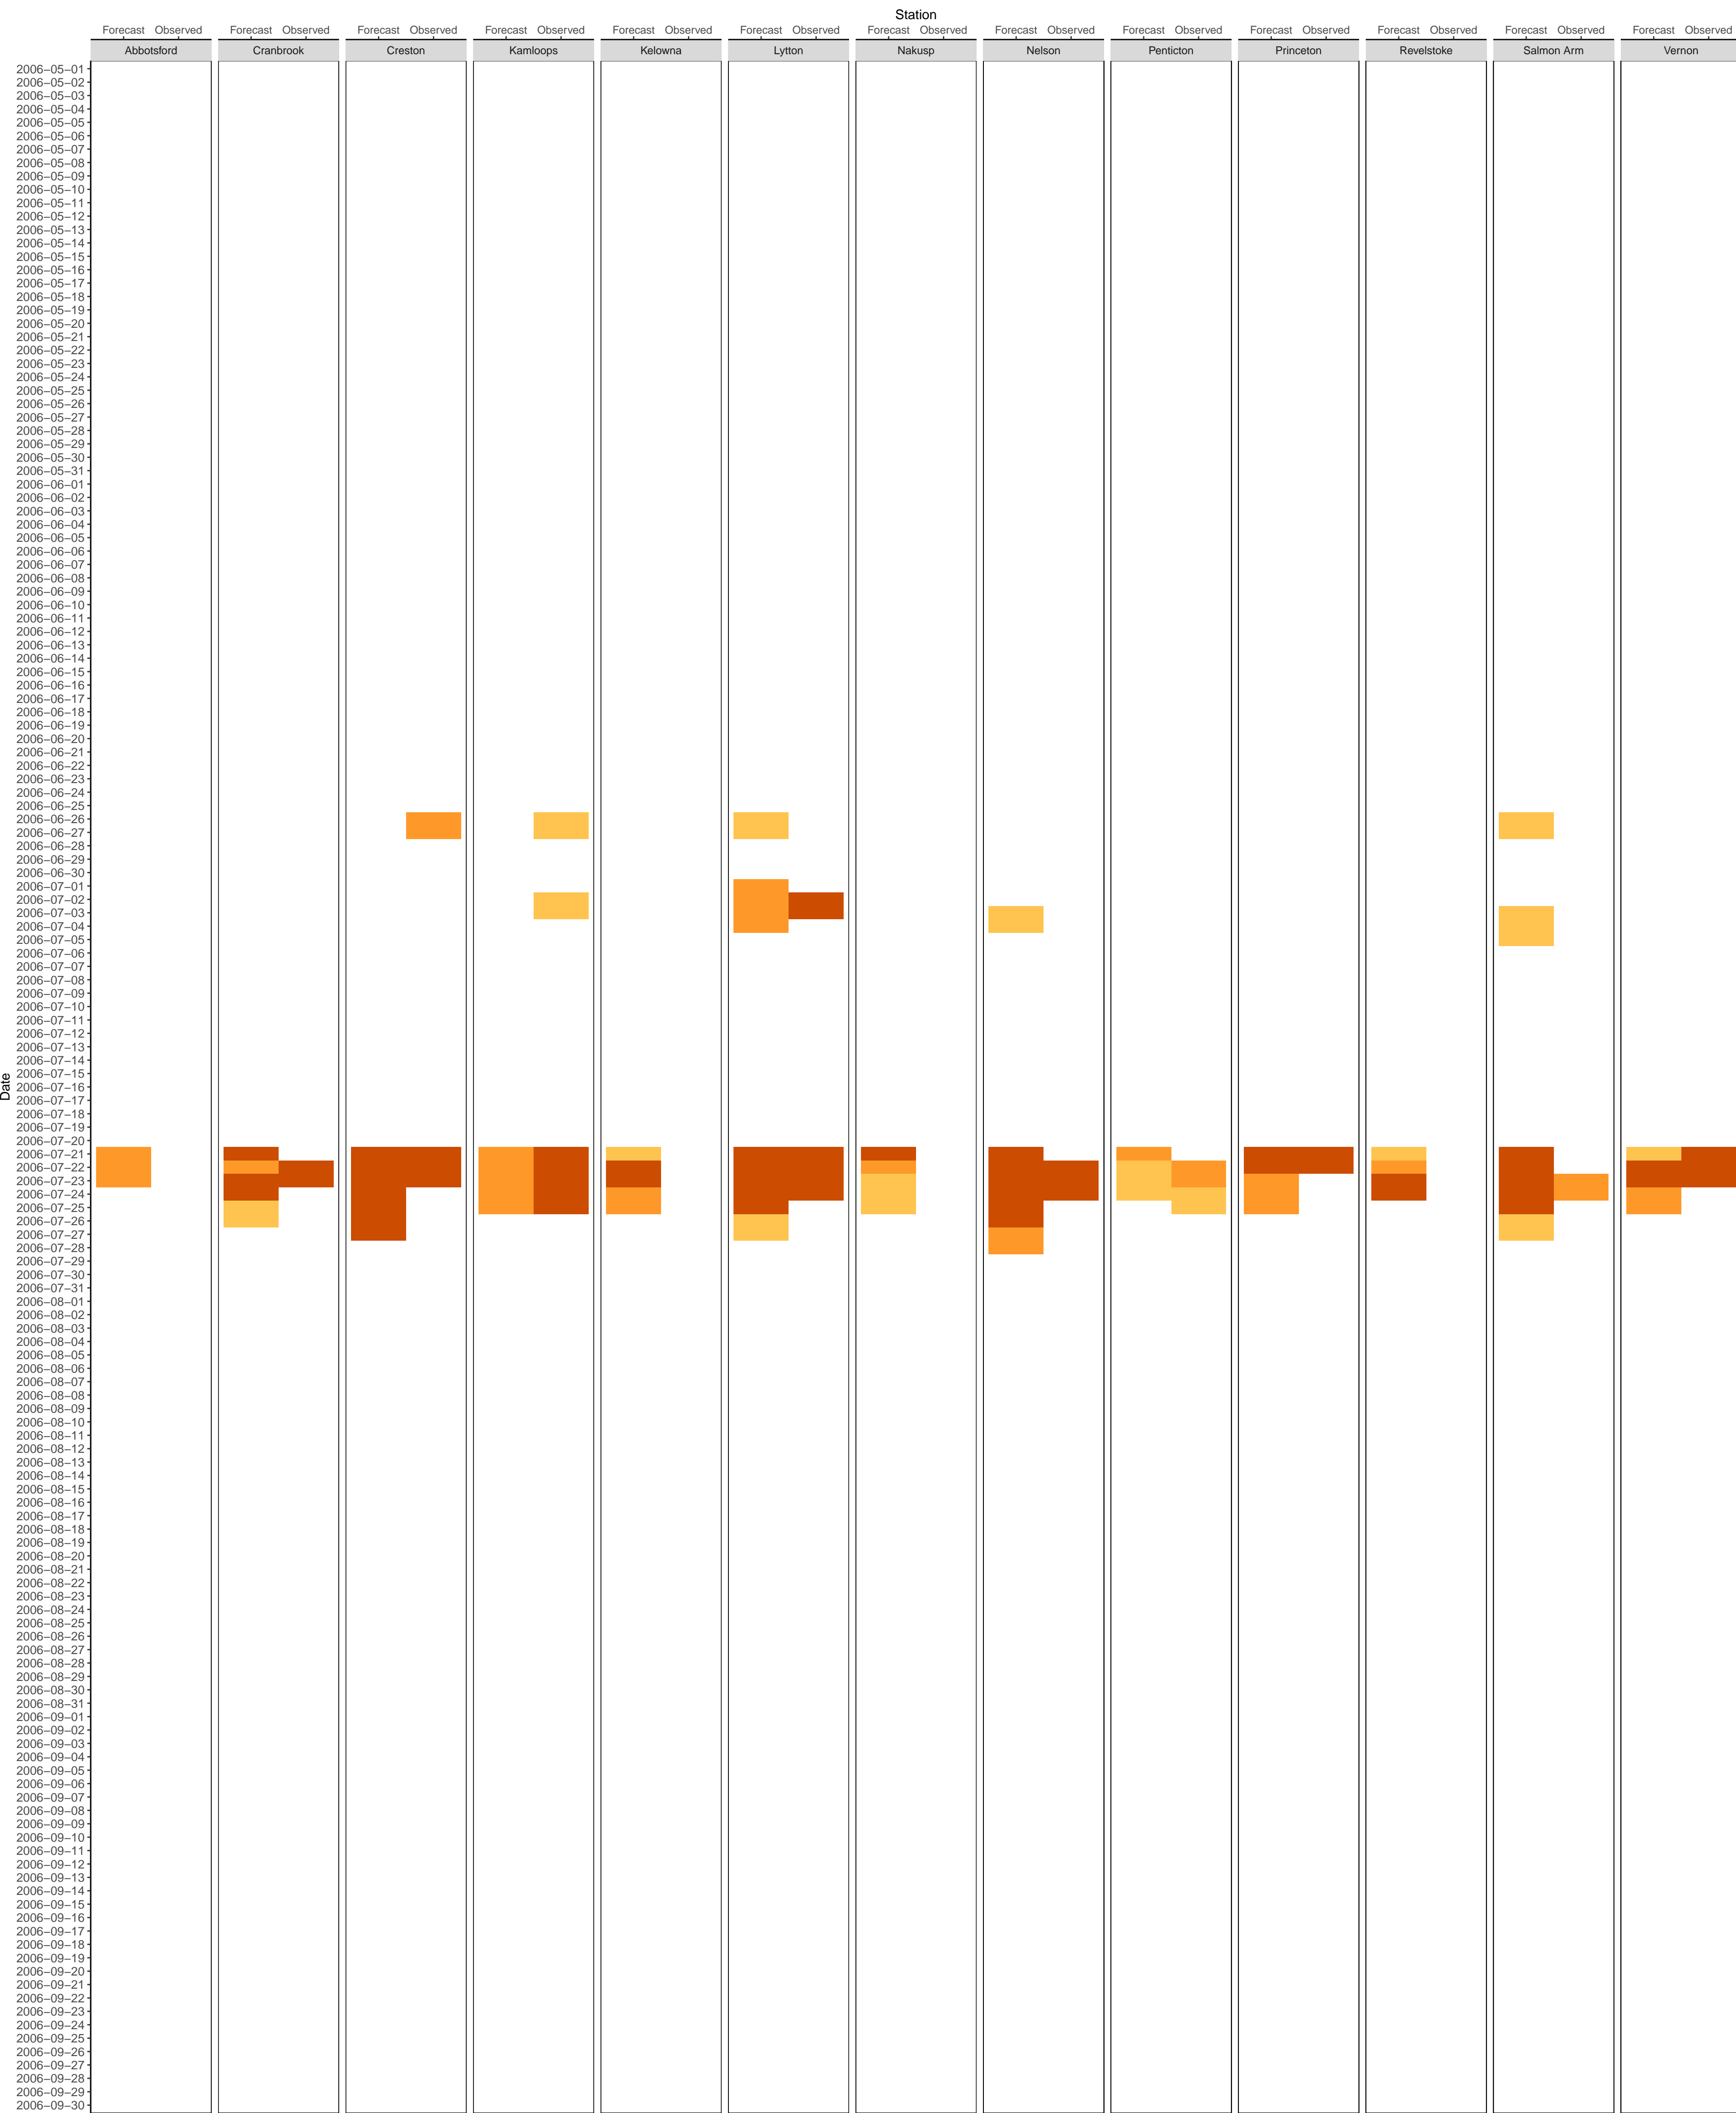







## Southeast

Category: ☐ No Alert ☐ Category 2 ☐ Category 1 ☐ Category 0

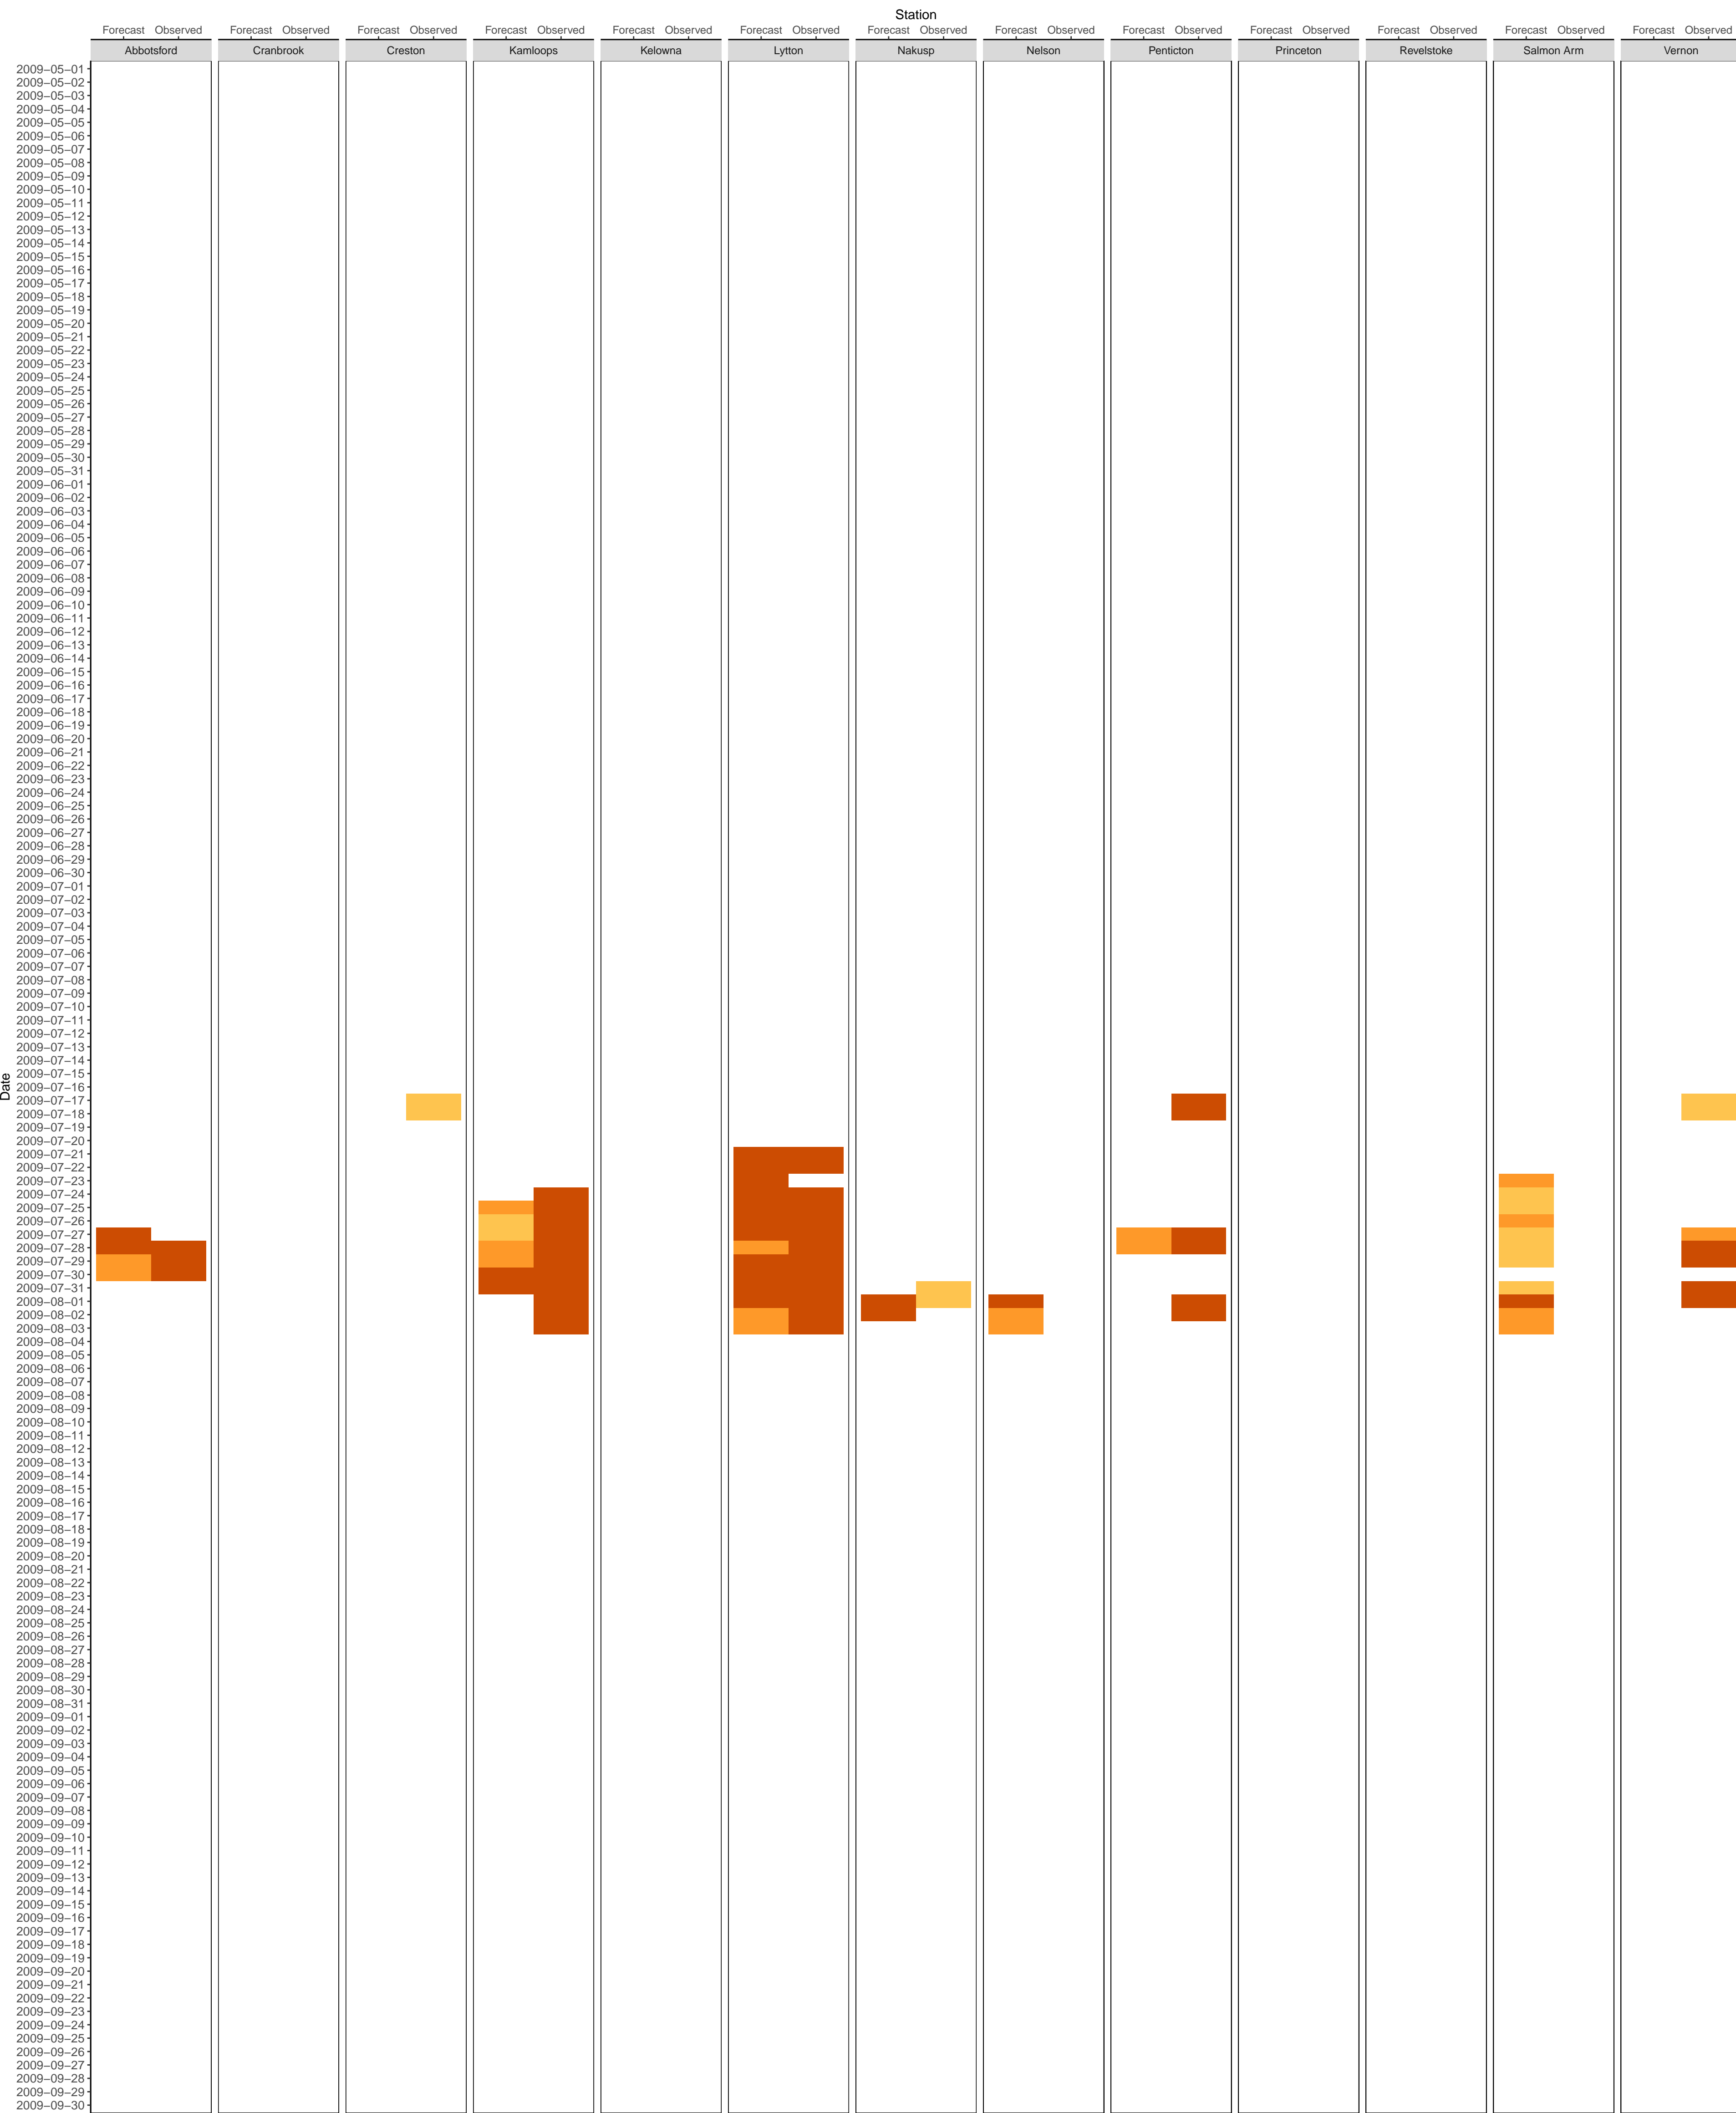

## Southeast

Category: ☐ No Alert ☐ Category 2 ☐ Category 1 ☐ Category 0

[illegible]

## Southeast

Category:  No Alert  Category 2  Category 1  Category 0

[illegible]



## Southeast

Category: ☐ No Alert ☐ Category 2 ☐ Category 1 ☐ Category 0

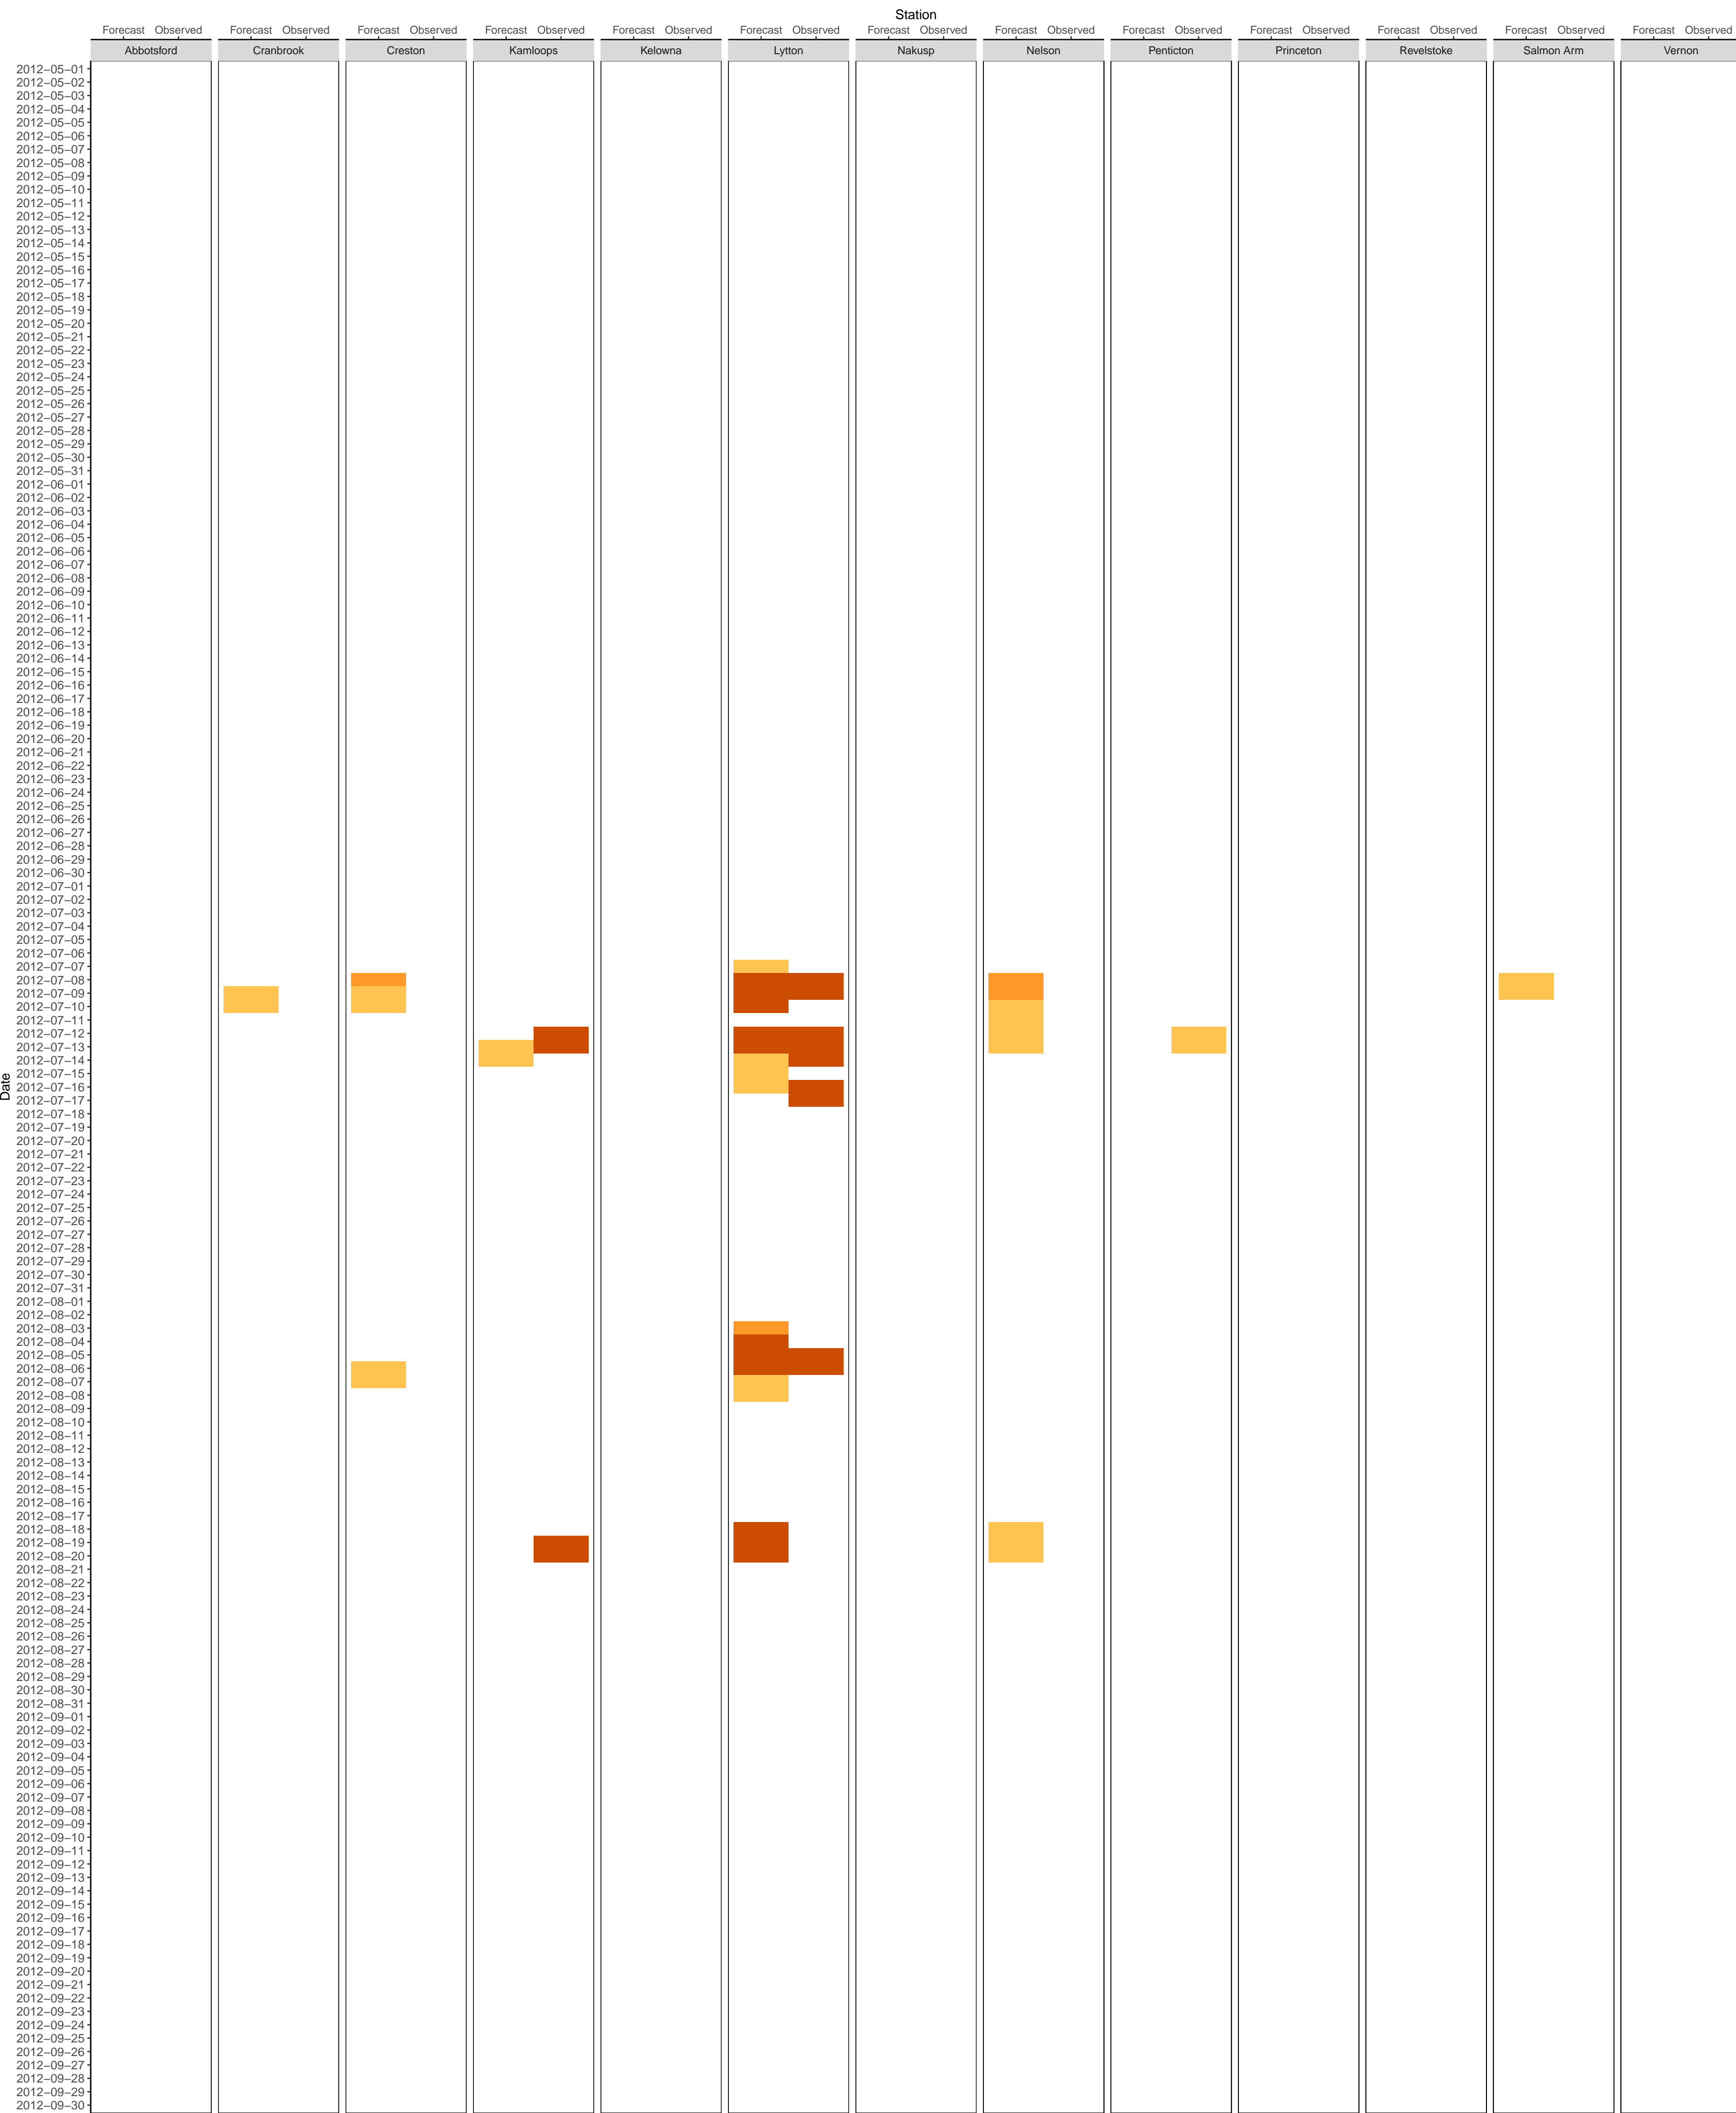

## Southeast

Category: ☐ No Alert ☐ Category 2 ☐ Category 1 ☐ Category 0

[illegible]

## Southeast

Category: ☐ No Alert ☐ Category 2 ☐ Category 1 ☐ Category 0

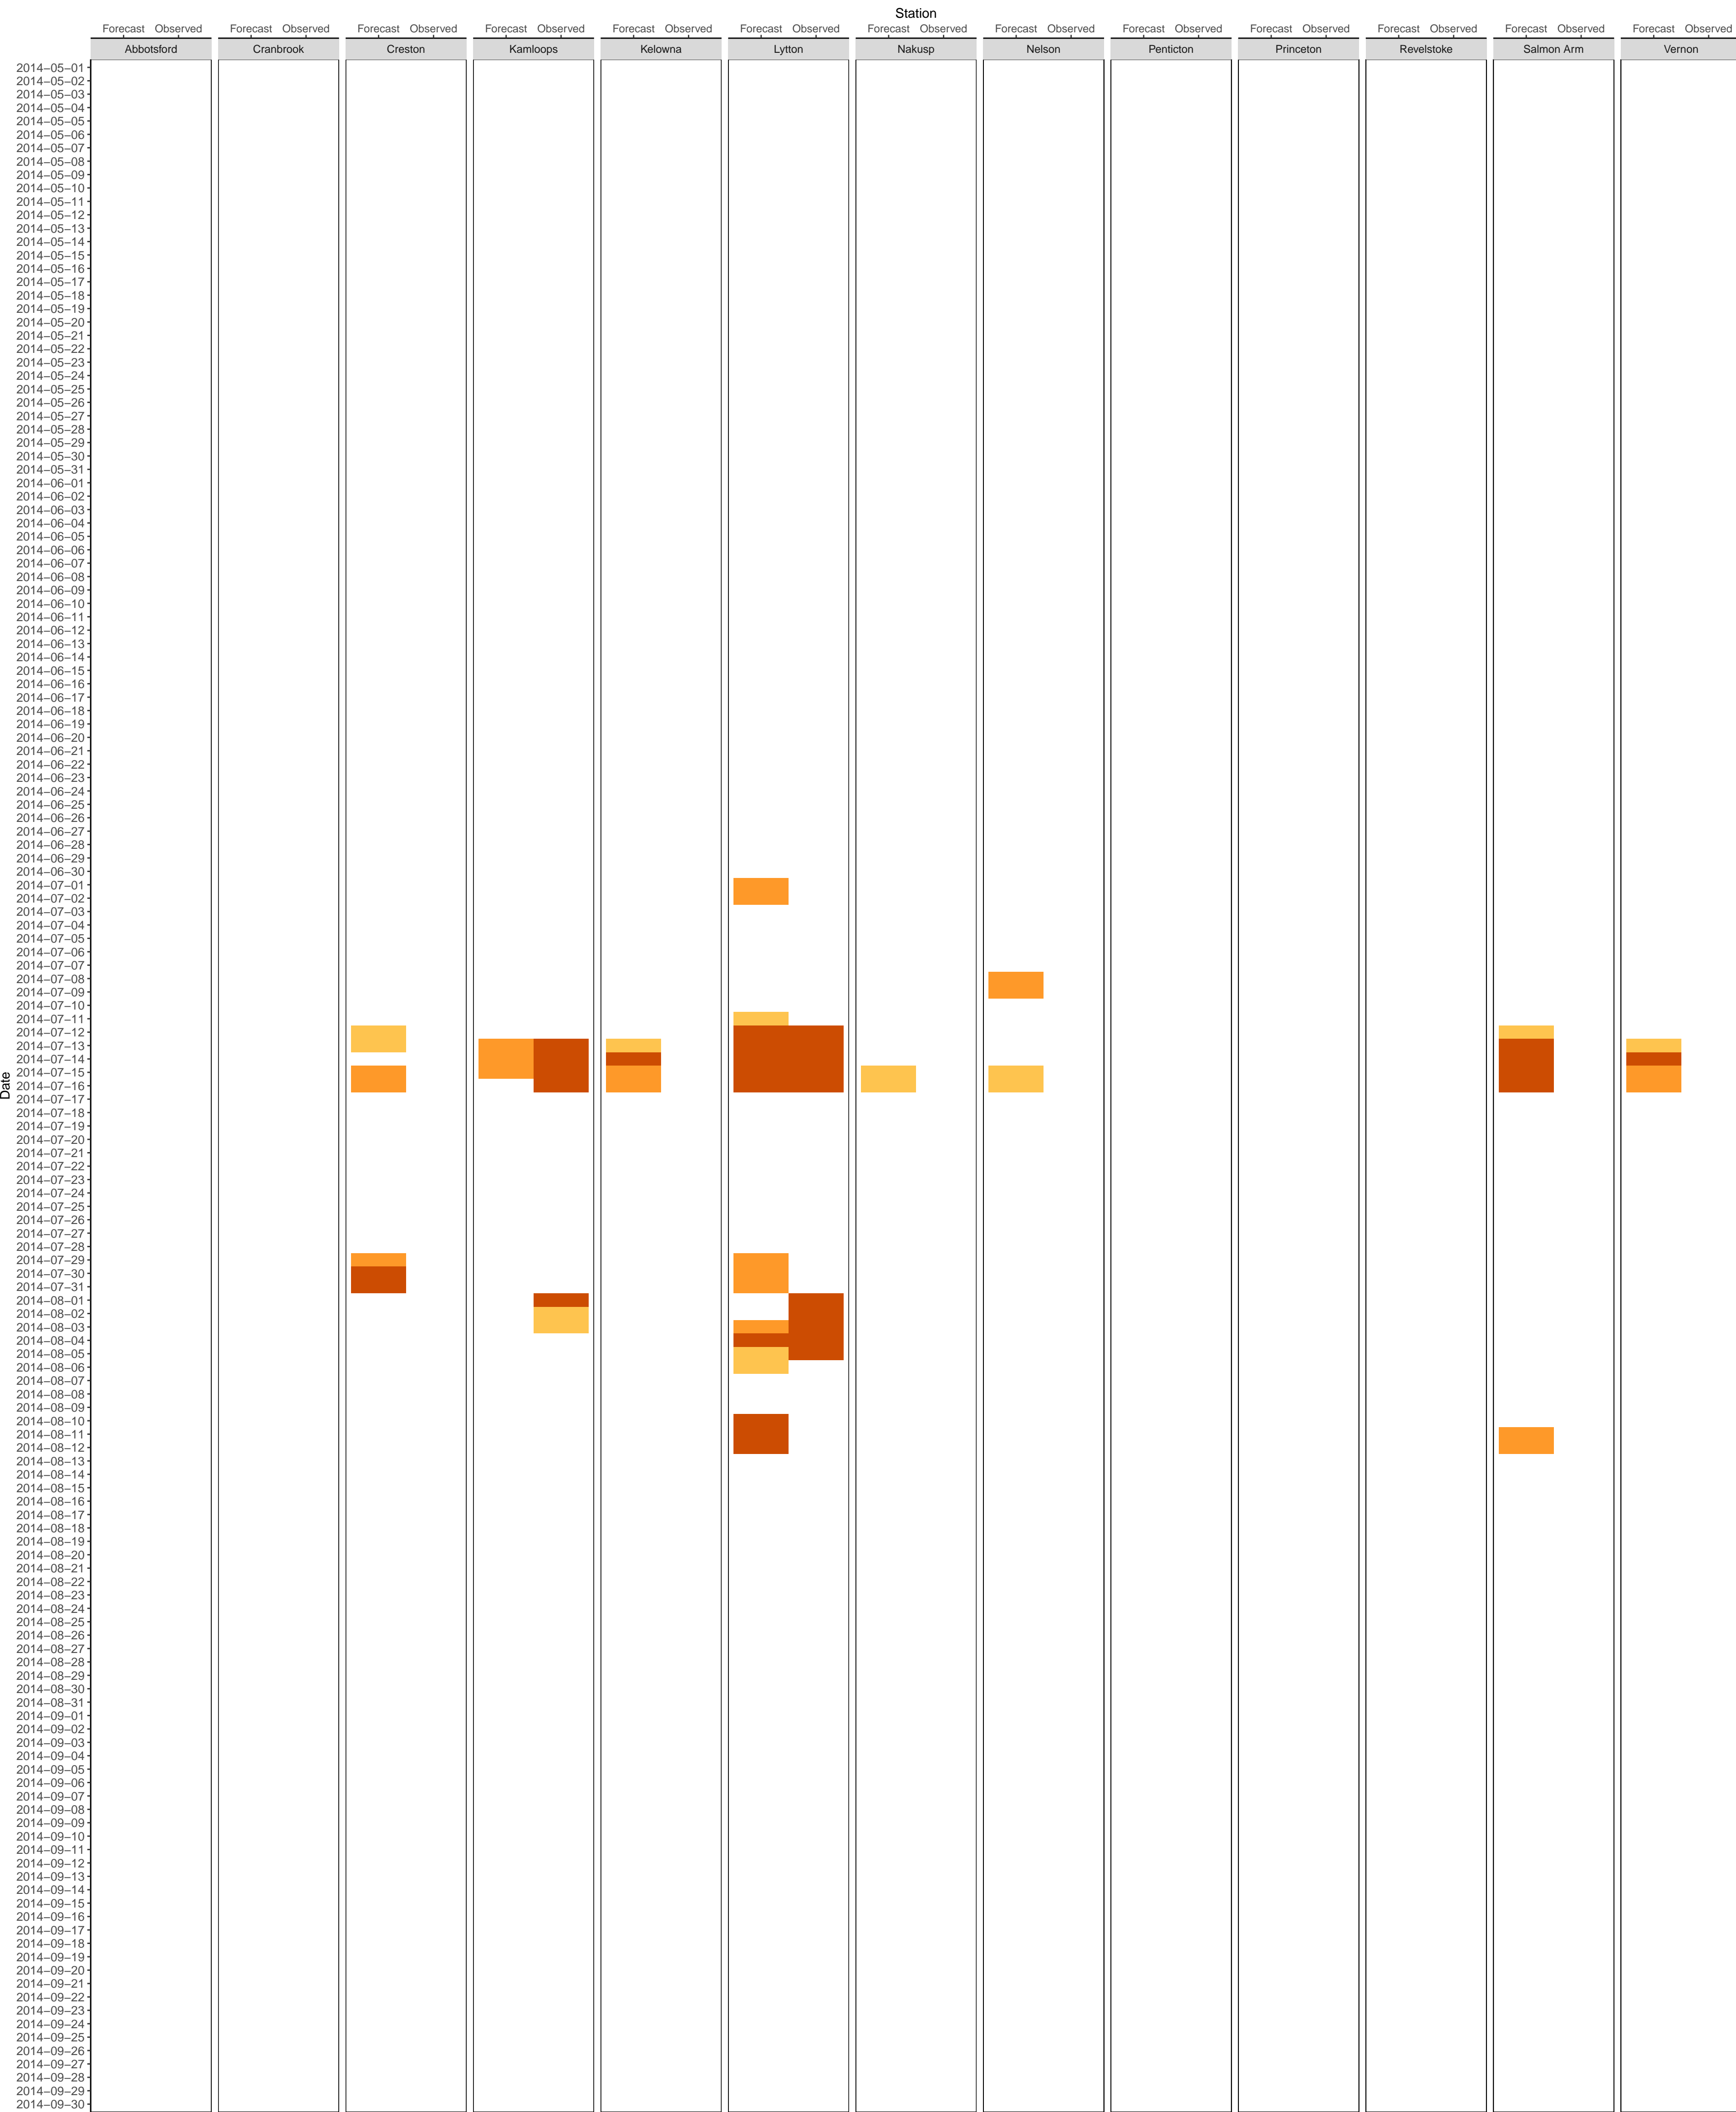

## Southeast

Category: ☐ No Alert ☐ Category 2 ☐ Category 1 ☐ Category 0

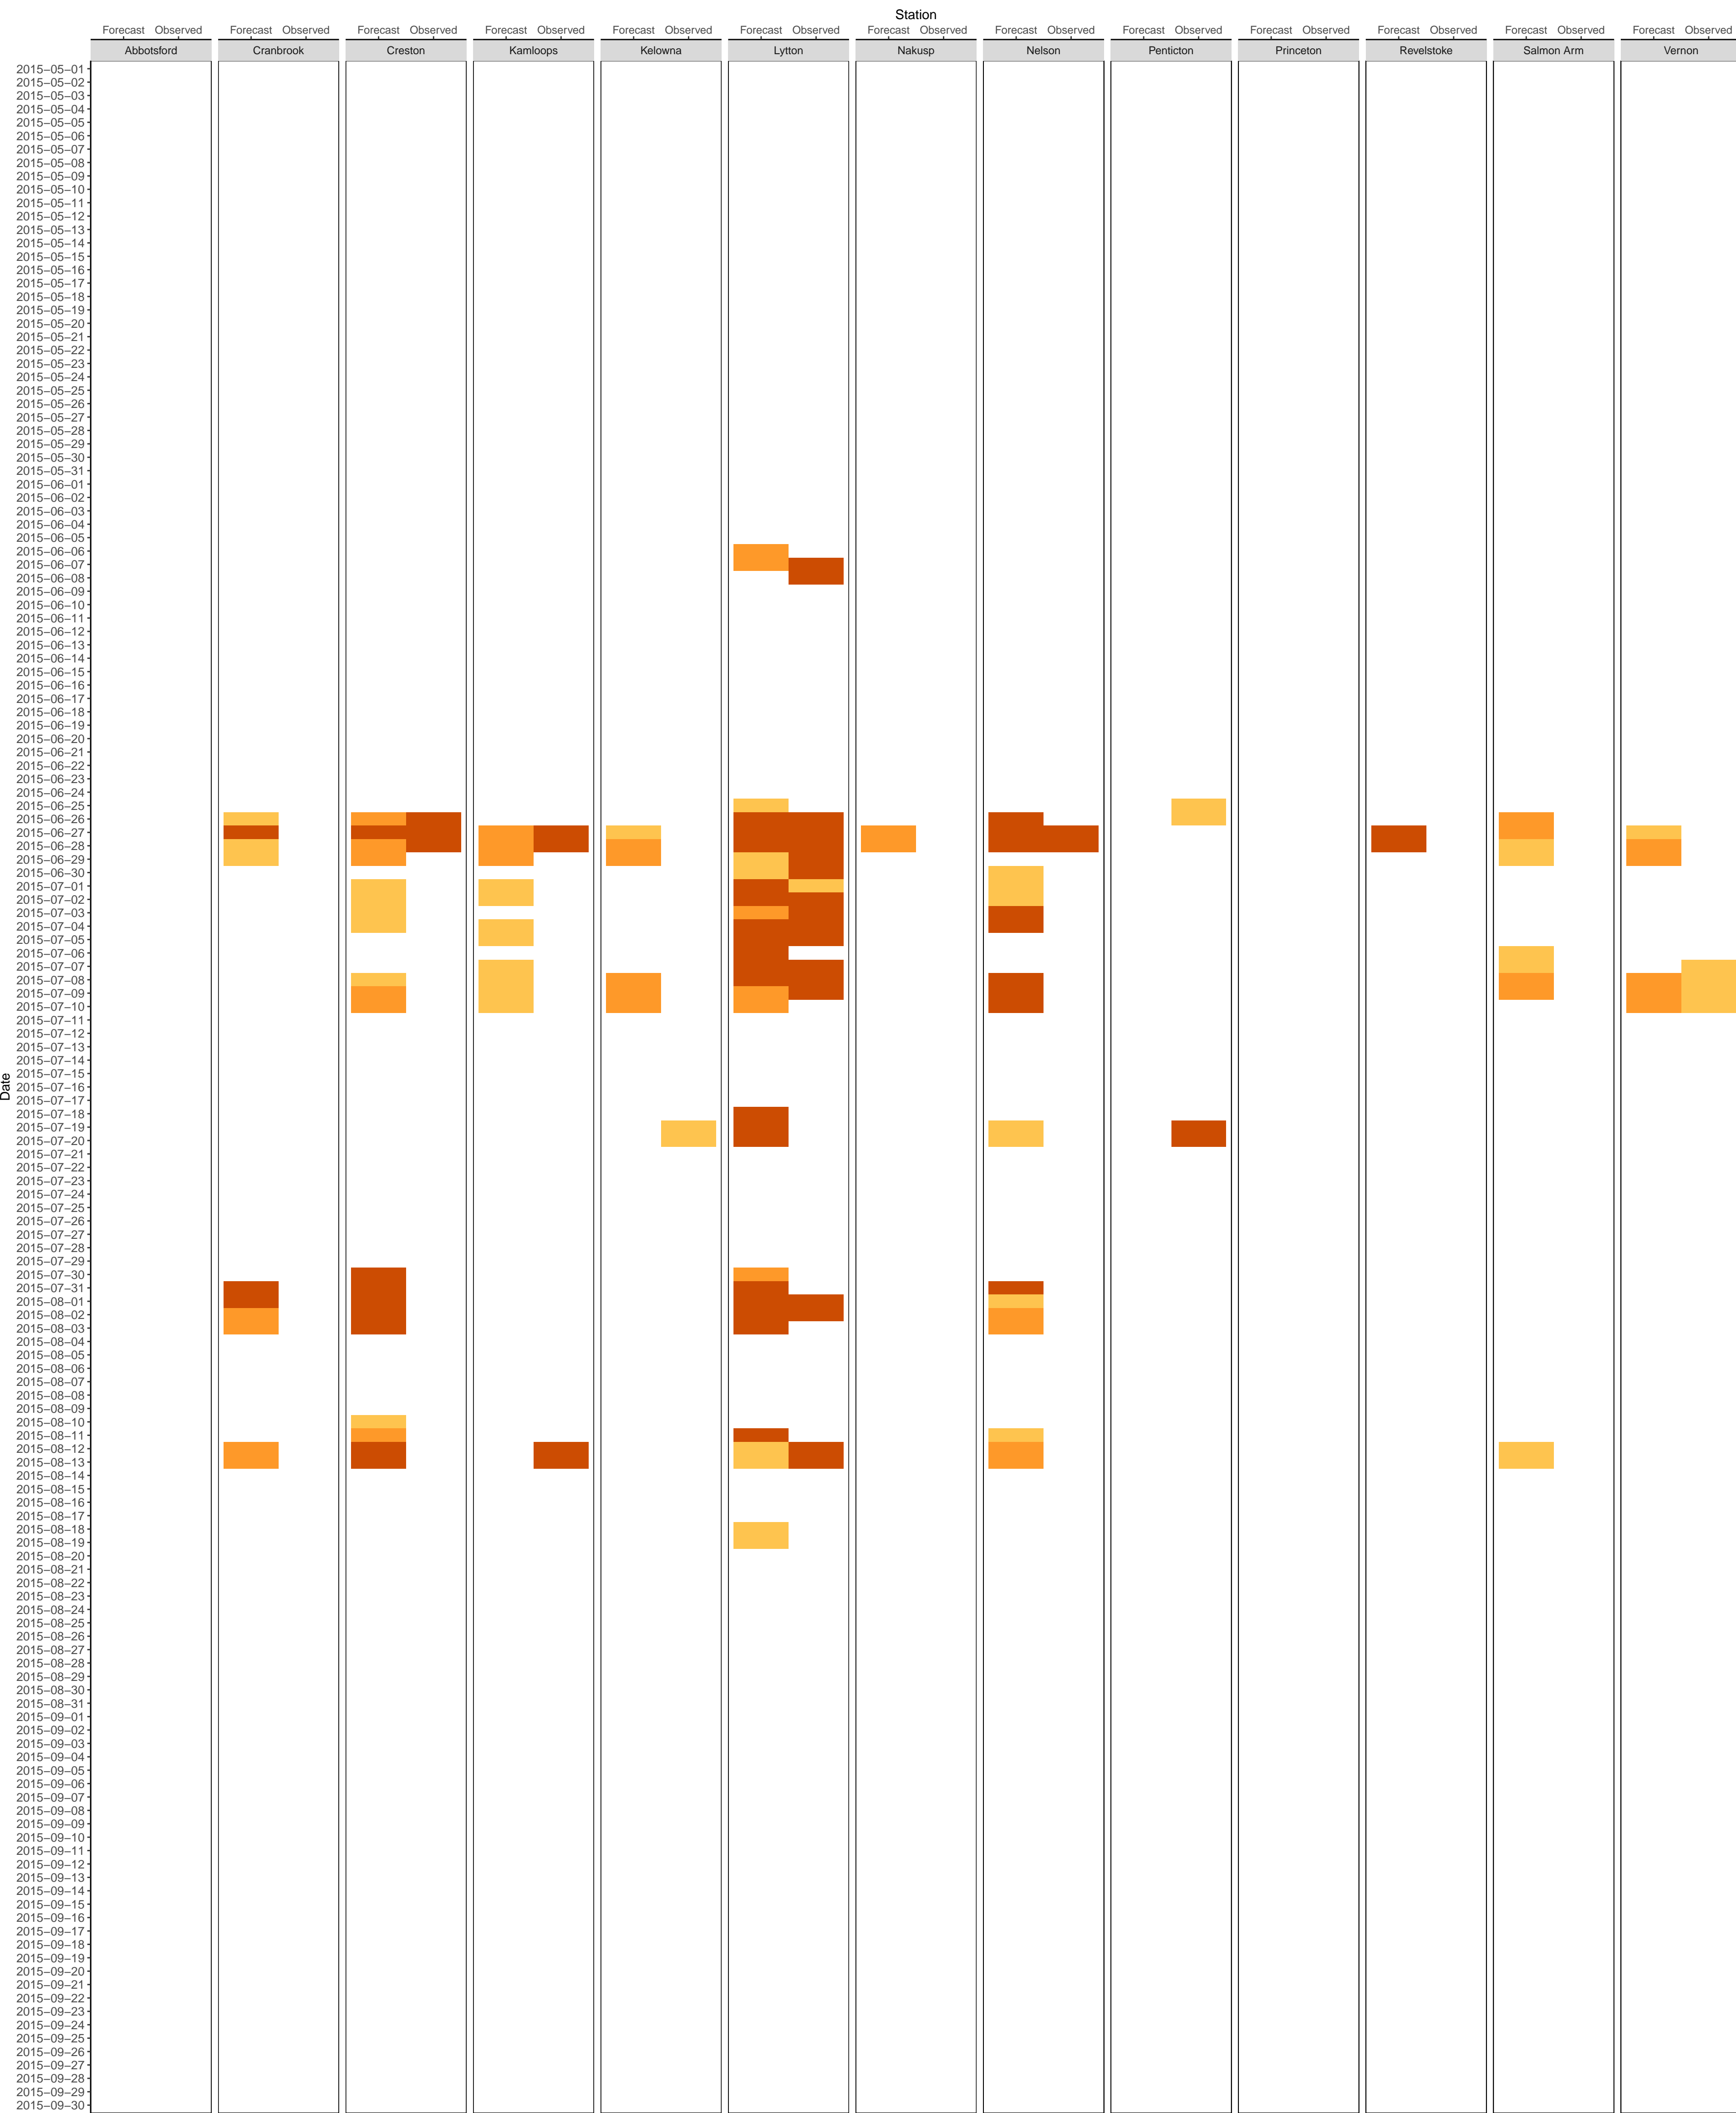

## Southeast

Category:  No Alert  Category 2  Category 1  Category 0

[illegible]
