# Supplementary material for: Establishing Heat Alert Thresholds for the Varied Climatic Regions of British Columbia, Canada
Source: MDPI journal article supplement (doi:10.3390/ijerph15092048), 2018-09-19
Supplement: s1 [file s1]

## Southwest

Category:  No Alert  Category 2  Category 1  Category 0

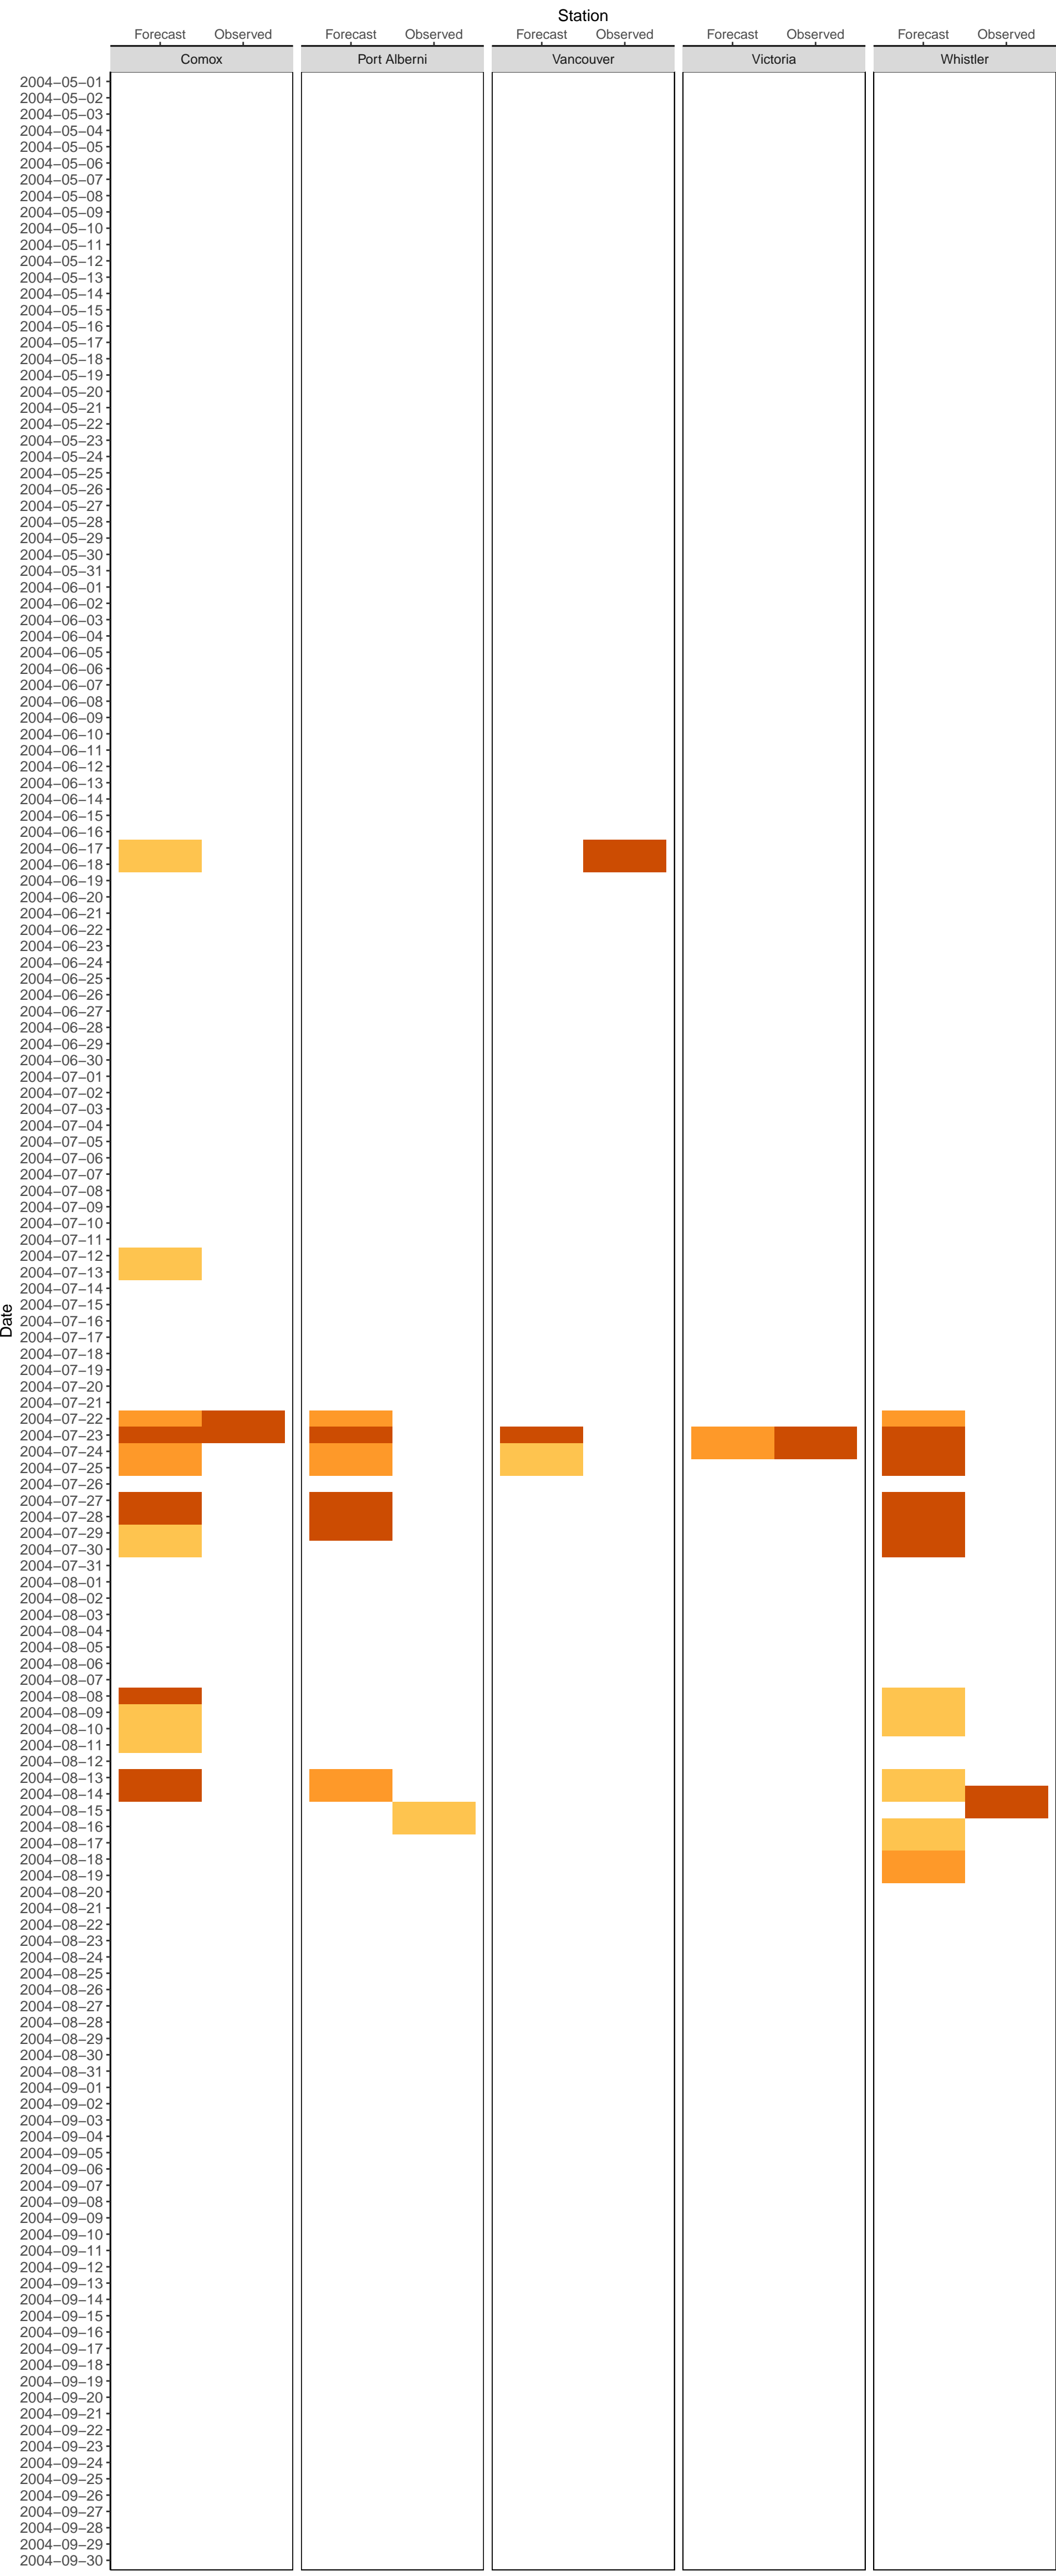

| Southwest                                                                                       |          |  |              |  |           |  |          |  |          |  |          |  |
|-------------------------------------------------------------------------------------------------|----------|--|--------------|--|-----------|--|----------|--|----------|--|----------|--|
| Category: <div>No Alert</div> <div>Category 2</div> <div>Category 1</div> <div>Category 0</div> |          |  |              |  |           |  |          |  |          |  |          |  |
| Date                                                                                            | Forecast |  | Observed     |  | Forecast  |  | Observed |  | Forecast |  | Observed |  |
|                                                                                                 | Station  |  | Station      |  | Station   |  | Station  |  | Station  |  | Station  |  |
|                                                                                                 | Comox    |  | Port Alberni |  | Vancouver |  | Victoria |  | Whistler |  |          |  |
| 2005-05-01                                                                                      |          |  |              |  |           |  |          |  |          |  |          |  |
| 2005-05-02                                                                                      |          |  |              |  |           |  |          |  |          |  |          |  |
| 2005-05-03                                                                                      |          |  |              |  |           |  |          |  |          |  |          |  |
| 2005-05-04                                                                                      |          |  |              |  |           |  |          |  |          |  |          |  |
| 2005-05-05                                                                                      |          |  |              |  |           |  |          |  |          |  |          |  |
| 2005-05-06                                                                                      |          |  |              |  |           |  |          |  |          |  |          |  |
| 2005-05-07                                                                                      |          |  |              |  |           |  |          |  |          |  |          |  |
| 2005-05-08                                                                                      |          |  |              |  |           |  |          |  |          |  |          |  |
| 2005-05-09                                                                                      |          |  |              |  |           |  |          |  |          |  |          |  |
| 2005-05-10                                                                                      |          |  |              |  |           |  |          |  |          |  |          |  |
| 2005-05-11                                                                                      |          |  |              |  |           |  |          |  |          |  |          |  |
| 2005-05-12                                                                                      |          |  |              |  |           |  |          |  |          |  |          |  |
| 2005-05-13                                                                                      |          |  |              |  |           |  |          |  |          |  |          |  |
| 2005-05-14                                                                                      |          |  |              |  |           |  |          |  |          |  |          |  |
| 2005-05-15                                                                                      |          |  |              |  |           |  |          |  |          |  |          |  |
| 2005-05-16                                                                                      |          |  |              |  |           |  |          |  |          |  |          |  |
| 2005-05-17                                                                                      |          |  |              |  |           |  |          |  |          |  |          |  |
| 2005-05-18                                                                                      |          |  |              |  |           |  |          |  |          |  |          |  |
| 2005-05-19                                                                                      |          |  |              |  |           |  |          |  |          |  |          |  |
| 2005-05-20                                                                                      |          |  |              |  |           |  |          |  |          |  |          |  |
| 2005-05-21                                                                                      |          |  |              |  |           |  |          |  |          |  |          |  |
| 2005-05-22                                                                                      |          |  |              |  |           |  |          |  |          |  |          |  |
| 2005-05-23                                                                                      |          |  |              |  |           |  |          |  |          |  |          |  |
| 2005-05-24                                                                                      |          |  |              |  |           |  |          |  |          |  |          |  |
| 2005-05-25                                                                                      |          |  |              |  |           |  |          |  |          |  |          |  |
| 2005-05-26                                                                                      |          |  |              |  |           |  |          |  |          |  |          |  |
| 2005-05-27                                                                                      |          |  |              |  |           |  |          |  |          |  |          |  |
| 2005-05-28                                                                                      |          |  |              |  |           |  |          |  |          |  |          |  |
| 2005-05-29                                                                                      |          |  |              |  |           |  |          |  |          |  |          |  |
| 2005-05-30                                                                                      |          |  |              |  |           |  |          |  |          |  |          |  |
| 2005-05-31                                                                                      |          |  |              |  |           |  |          |  |          |  |          |  |
| 2005-06-01                                                                                      |          |  |              |  |           |  |          |  |          |  |          |  |
| 2005-06-02                                                                                      |          |  |              |  |           |  |          |  |          |  |          |  |
| 2005-06-03                                                                                      |          |  |              |  |           |  |          |  |          |  |          |  |
| 2005-06-04                                                                                      |          |  |              |  |           |  |          |  |          |  |          |  |
| 2005-06-05                                                                                      |          |  |              |  |           |  |          |  |          |  |          |  |
| 2005-06-06                                                                                      |          |  |              |  |           |  |          |  |          |  |          |  |
| 2005-06-07                                                                                      |          |  |              |  |           |  |          |  |          |  |          |  |
| 2005-06-08                                                                                      |          |  |              |  |           |  |          |  |          |  |          |  |
| 2005-06-09                                                                                      |          |  |              |  |           |  |          |  |          |  |          |  |
| 2005-06-10                                                                                      |          |  |              |  |           |  |          |  |          |  |          |  |
| 2005-06-11                                                                                      |          |  |              |  |           |  |          |  |          |  |          |  |
| 2005-06-12                                                                                      |          |  |              |  |           |  |          |  |          |  |          |  |
| 2005-06-13                                                                                      |          |  |              |  |           |  |          |  |          |  |          |  |
| 2005-06-14                                                                                      |          |  |              |  |           |  |          |  |          |  |          |  |
| 2005-06-15                                                                                      |          |  |              |  |           |  |          |  |          |  |          |  |
| 2005-06-16                                                                                      |          |  |              |  |           |  |          |  |          |  |          |  |
| 2005-06-17                                                                                      |          |  |              |  |           |  |          |  |          |  |          |  |
| 2005-06-18                                                                                      |          |  |              |  |           |  |          |  |          |  |          |  |
| 2005-06-19                                                                                      |          |  |              |  |           |  |          |  |          |  |          |  |
| 2005-06-20                                                                                      |          |  |              |  |           |  |          |  |          |  |          |  |
| 2005-06-21                                                                                      |          |  |              |  |           |  |          |  |          |  |          |  |
| 2005-06-22                                                                                      |          |  |              |  |           |  |          |  |          |  |          |  |
| 2005-06-23                                                                                      |          |  |              |  |           |  |          |  |          |  |          |  |
| 2005-06-24                                                                                      |          |  |              |  |           |  |          |  |          |  |          |  |
| 2005-06-25                                                                                      |          |  |              |  |           |  |          |  |          |  |          |  |
| 2005-06-26                                                                                      |          |  |              |  |           |  |          |  |          |  |          |  |
| 2005-06-27                                                                                      |          |  |              |  |           |  |          |  |          |  |          |  |
| 2005-06-28                                                                                      |          |  |              |  |           |  |          |  |          |  |          |  |
| 2005-06-29                                                                                      |          |  |              |  |           |  |          |  |          |  |          |  |
| 2005-06-30                                                                                      |          |  |              |  |           |  |          |  |          |  |          |  |
| 2005-07-01                                                                                      |          |  |              |  |           |  |          |  |          |  |          |  |
| 2005-07-02                                                                                      |          |  |              |  |           |  |          |  |          |  |          |  |
| 2005-07-03                                                                                      |          |  |              |  |           |  |          |  |          |  |          |  |
| 2005-07-04                                                                                      |          |  |              |  |           |  |          |  |          |  |          |  |
| 2005-07-05                                                                                      |          |  |              |  |           |  |          |  |          |  |          |  |
| 2005-07-06                                                                                      |          |  |              |  |           |  |          |  |          |  |          |  |
| 2005-07-07                                                                                      |          |  |              |  |           |  |          |  |          |  |          |  |
| 2005-07-08                                                                                      |          |  |              |  |           |  |          |  |          |  |          |  |
| 2005-07-09                                                                                      |          |  |              |  |           |  |          |  |          |  |          |  |
| 2005-07-10                                                                                      |          |  |              |  |           |  |          |  |          |  |          |  |
| 2005-07-11                                                                                      |          |  |              |  |           |  |          |  |          |  |          |  |
| 2005-07-12                                                                                      |          |  |              |  |           |  |          |  |          |  |          |  |
| 2005-07-13                                                                                      |          |  |              |  |           |  |          |  |          |  |          |  |
| 2005-07-14                                                                                      |          |  |              |  |           |  |          |  |          |  |          |  |
| 2005-07-15                                                                                      |          |  |              |  |           |  |          |  |          |  |          |  |
| 2005-07-16                                                                                      |          |  |              |  |           |  |          |  |          |  |          |  |
| 2005-07-17                                                                                      |          |  |              |  |           |  |          |  |          |  |          |  |
| 2005-07-18                                                                                      |          |  |              |  |           |  |          |  |          |  |          |  |
| 2005-07-19                                                                                      |          |  |              |  |           |  |          |  |          |  |          |  |
| 2005-07-20                                                                                      |          |  |              |  |           |  |          |  |          |  |          |  |
| 2005-07-21                                                                                      |          |  |              |  |           |  |          |  |          |  |          |  |
| 2005-07-22                                                                                      |          |  |              |  |           |  |          |  |          |  |          |  |
| 2005-07-23                                                                                      |          |  |              |  |           |  |          |  |          |  |          |  |
| 2005-07-24                                                                                      |          |  |              |  |           |  |          |  |          |  |          |  |
| 2005-07-25                                                                                      |          |  |              |  |           |  |          |  |          |  |          |  |
| 2005-07-26                                                                                      |          |  |              |  |           |  |          |  |          |  |          |  |
| 2005-07-27                                                                                      |          |  |              |  |           |  |          |  |          |  |          |  |
| 2005-07-28                                                                                      |          |  |              |  |           |  |          |  |          |  |          |  |
| 2005-07-29                                                                                      |          |  |              |  |           |  |          |  |          |  |          |  |
| 2005-07-30                                                                                      |          |  |              |  |           |  |          |  |          |  |          |  |
| 2005-07-31                                                                                      |          |  |              |  |           |  |          |  |          |  |          |  |
| 2005-08-01                                                                                      |          |  |              |  |           |  |          |  |          |  |          |  |
| 2005-08-02                                                                                      |          |  |              |  |           |  |          |  |          |  |          |  |
| 2005-08-03                                                                                      |          |  |              |  |           |  |          |  |          |  |          |  |
| 2005-08-04                                                                                      |          |  |              |  |           |  |          |  |          |  |          |  |
| 2005-08-05                                                                                      |          |  |              |  |           |  |          |  |          |  |          |  |
| 2005-08-06                                                                                      |          |  |              |  |           |  |          |  |          |  |          |  |
| 2005-08-07                                                                                      |          |  |              |  |           |  |          |  |          |  |          |  |
| 2005-08-08                                                                                      |          |  |              |  |           |  |          |  |          |  |          |  |
| 2005-08-09                                                                                      |          |  |              |  |           |  |          |  |          |  |          |  |
| 2005-08-10                                                                                      |          |  |              |  |           |  |          |  |          |  |          |  |
| 2005-08-11                                                                                      |          |  |              |  |           |  |          |  |          |  |          |  |
| 2005-08-12                                                                                      |          |  |              |  |           |  |          |  |          |  |          |  |
| 2005-08-13                                                                                      |          |  |              |  |           |  |          |  |          |  |          |  |
| 2005-08-14                                                                                      |          |  |              |  |           |  |          |  |          |  |          |  |
| 2005-08-15                                                                                      |          |  |              |  |           |  |          |  |          |  |          |  |
| 2005-08-16                                                                                      |          |  |              |  |           |  |          |  |          |  |          |  |
| 2005-08-17                                                                                      |          |  |              |  |           |  |          |  |          |  |          |  |
| 2005-08-18                                                                                      |          |  |              |  |           |  |          |  |          |  |          |  |
| 2005-08-19                                                                                      |          |  |              |  |           |  |          |  |          |  |          |  |
| 2005-08-20                                                                                      |          |  |              |  |           |  |          |  |          |  |          |  |
| 2005-08-21                                                                                      |          |  |              |  |           |  |          |  |          |  |          |  |
| 2005-08-22                                                                                      |          |  |              |  |           |  |          |  |          |  |          |  |
| 2005-08-23                                                                                      |          |  |              |  |           |  |          |  |          |  |          |  |
| 2005-08-24                                                                                      |          |  |              |  |           |  |          |  |          |  |          |  |
| 2005-08-25                                                                                      |          |  |              |  |           |  |          |  |          |  |          |  |
| 2005-08-26                                                                                      |          |  |              |  |           |  |          |  |          |  |          |  |
| 2005-08-27                                                                                      |          |  |              |  |           |  |          |  |          |  |          |  |
| 2005-08-28                                                                                      |          |  |              |  |           |  |          |  |          |  |          |  |
| 2005-08-29                                                                                      |          |  |              |  |           |  |          |  |          |  |          |  |
| 2005-08-30                                                                                      |          |  |              |  |           |  |          |  |          |  |          |  |
| 2005-08-31                                                                                      |          |  |              |  |           |  |          |  |          |  |          |  |
| 2005-09-01                                                                                      |          |  |              |  |           |  |          |  |          |  |          |  |
| 2005-09-02                                                                                      |          |  |              |  |           |  |          |  |          |  |          |  |
| 2005-09-03                                                                                      |          |  |              |  |           |  |          |  |          |  |          |  |
| 2005-09-04                                                                                      |          |  |              |  |           |  |          |  |          |  |          |  |
| 2005-09-05                                                                                      |          |  |              |  |           |  |          |  |          |  |          |  |
| 2005-09-06                                                                                      |          |  |              |  |           |  |          |  |          |  |          |  |
| 2005-09-07                                                                                      |          |  |              |  |           |  |          |  |          |  |          |  |
| 2005-09-08                                                                                      |          |  |              |  |           |  |          |  |          |  |          |  |
| 2005-09-09                                                                                      |          |  |              |  |           |  |          |  |          |  |          |  |
| 2005-09-10                                                                                      |          |  |              |  |           |  |          |  |          |  |          |  |
| 2005-09-11                                                                                      |          |  |              |  |           |  |          |  |          |  |          |  |
| 2005-09-12                                                                                      |          |  |              |  |           |  |          |  |          |  |          |  |
| 2005-09-13                                                                                      |          |  |              |  |           |  |          |  |          |  |          |  |
| 2005-09-14                                                                                      |          |  |              |  |           |  |          |  |          |  |          |  |
| 2005-09-15                                                                                      |          |  |              |  |           |  |          |  |          |  |          |  |
| 2005-09-16                                                                                      |          |  |              |  |           |  |          |  |          |  |          |  |
| 2005-09-17                                                                                      |          |  |              |  |           |  |          |  |          |  |          |  |
| 2005-09-18                                                                                      |          |  |              |  |           |  |          |  |          |  |          |  |
| 2005-09-19                                                                                      |          |  |              |  |           |  |          |  |          |  |          |  |
| 2005-09-20                                                                                      |          |  |              |  |           |  |          |  |          |  |          |  |
| 2005-09-21                                                                                      |          |  |              |  |           |  |          |  |          |  |          |  |
| 2005-09-22                                                                                      |          |  |              |  |           |  |          |  |          |  |          |  |
| 2005-09-23                                                                                      |          |  |              |  |           |  |          |  |          |  |          |  |
| 2005-09-24                                                                                      |          |  |              |  |           |  |          |  |          |  |          |  |
| 2005-09-25                                                                                      |          |  |              |  |           |  |          |  |          |  |          |  |
| 2005-09-26                                                                                      |          |  |              |  |           |  |          |  |          |  |          |  |
| 2005-09-27                                                                                      |          |  |              |  |           |  |          |  |          |  |          |  |
| 2005-09-28                                                                                      |          |  |              |  |           |  |          |  |          |  |          |  |
| 2005-09-29                                                                                      |          |  |              |  |           |  |          |  |          |  |          |  |
| 2005-09-30                                                                                      |          |  |              |  |           |  |          |  |          |  |          |  |

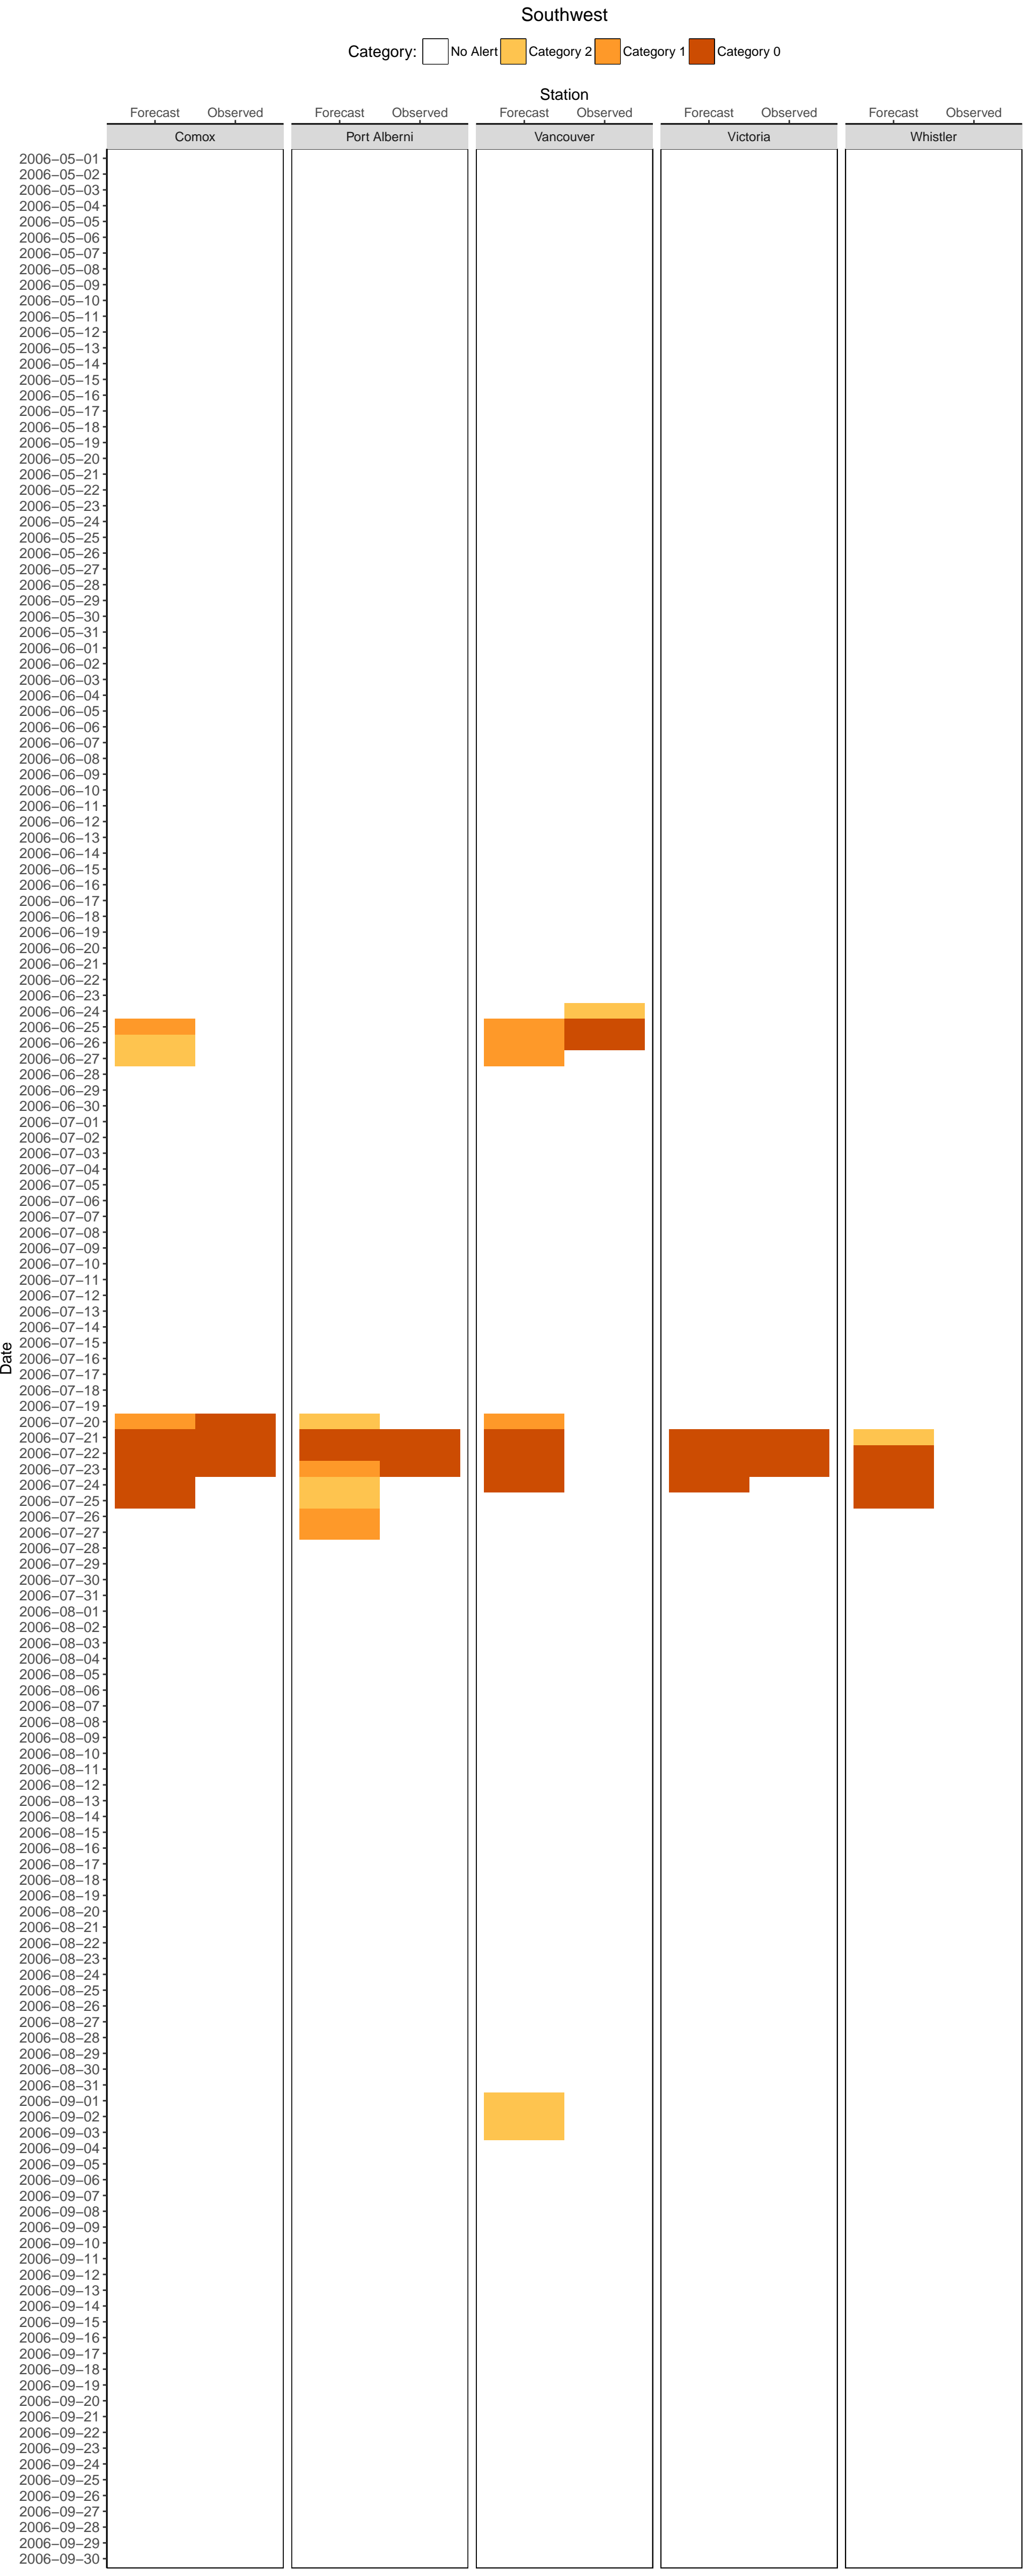

| Southwest                                                                                       |          |  |              |  |           |  |          |  |          |  |
|-------------------------------------------------------------------------------------------------|----------|--|--------------|--|-----------|--|----------|--|----------|--|
| Category: <div>No Alert</div> <div>Category 2</div> <div>Category 1</div> <div>Category 0</div> |          |  |              |  |           |  |          |  |          |  |
| Date                                                                                            | Forecast |  | Observed     |  | Forecast  |  | Observed |  | Forecast |  |
|                                                                                                 | Station  |  | Station      |  | Station   |  | Station  |  | Station  |  |
|                                                                                                 | Comox    |  | Port Alberni |  | Vancouver |  | Victoria |  | Whistler |  |
| 2007-05-01                                                                                      |          |  |              |  |           |  |          |  |          |  |
| 2007-05-02                                                                                      |          |  |              |  |           |  |          |  |          |  |
| 2007-05-03                                                                                      |          |  |              |  |           |  |          |  |          |  |
| 2007-05-04                                                                                      |          |  |              |  |           |  |          |  |          |  |
| 2007-05-05                                                                                      |          |  |              |  |           |  |          |  |          |  |
| 2007-05-06                                                                                      |          |  |              |  |           |  |          |  |          |  |
| 2007-05-07                                                                                      |          |  |              |  |           |  |          |  |          |  |
| 2007-05-08                                                                                      |          |  |              |  |           |  |          |  |          |  |
| 2007-05-09                                                                                      |          |  |              |  |           |  |          |  |          |  |
| 2007-05-10                                                                                      |          |  |              |  |           |  |          |  |          |  |
| 2007-05-11                                                                                      |          |  |              |  |           |  |          |  |          |  |
| 2007-05-12                                                                                      |          |  |              |  |           |  |          |  |          |  |
| 2007-05-13                                                                                      |          |  |              |  |           |  |          |  |          |  |
| 2007-05-14                                                                                      |          |  |              |  |           |  |          |  |          |  |
| 2007-05-15                                                                                      |          |  |              |  |           |  |          |  |          |  |
| 2007-05-16                                                                                      |          |  |              |  |           |  |          |  |          |  |
| 2007-05-17                                                                                      |          |  |              |  |           |  |          |  |          |  |
| 2007-05-18                                                                                      |          |  |              |  |           |  |          |  |          |  |
| 2007-05-19                                                                                      |          |  |              |  |           |  |          |  |          |  |
| 2007-05-20                                                                                      |          |  |              |  |           |  |          |  |          |  |
| 2007-05-21                                                                                      |          |  |              |  |           |  |          |  |          |  |
| 2007-05-22                                                                                      |          |  |              |  |           |  |          |  |          |  |
| 2007-05-23                                                                                      |          |  |              |  |           |  |          |  |          |  |
| 2007-05-24                                                                                      |          |  |              |  |           |  |          |  |          |  |
| 2007-05-25                                                                                      |          |  |              |  |           |  |          |  |          |  |
| 2007-05-26                                                                                      |          |  |              |  |           |  |          |  |          |  |
| 2007-05-27                                                                                      |          |  |              |  |           |  |          |  |          |  |
| 2007-05-28                                                                                      |          |  |              |  |           |  |          |  |          |  |
| 2007-05-29                                                                                      |          |  |              |  |           |  |          |  |          |  |
| 2007-05-30                                                                                      |          |  |              |  |           |  |          |  |          |  |
| 2007-05-31                                                                                      |          |  |              |  |           |  |          |  |          |  |
| 2007-06-01                                                                                      |          |  |              |  |           |  |          |  |          |  |
| 2007-06-02                                                                                      |          |  |              |  |           |  |          |  |          |  |
| 2007-06-03                                                                                      |          |  |              |  |           |  |          |  |          |  |
| 2007-06-04                                                                                      |          |  |              |  |           |  |          |  |          |  |
| 2007-06-05                                                                                      |          |  |              |  |           |  |          |  |          |  |
| 2007-06-06                                                                                      |          |  |              |  |           |  |          |  |          |  |
| 2007-06-07                                                                                      |          |  |              |  |           |  |          |  |          |  |
| 2007-06-08                                                                                      |          |  |              |  |           |  |          |  |          |  |
| 2007-06-09                                                                                      |          |  |              |  |           |  |          |  |          |  |
| 2007-06-10                                                                                      |          |  |              |  |           |  |          |  |          |  |
| 2007-06-11                                                                                      |          |  |              |  |           |  |          |  |          |  |
| 2007-06-12                                                                                      |          |  |              |  |           |  |          |  |          |  |
| 2007-06-13                                                                                      |          |  |              |  |           |  |          |  |          |  |
| 2007-06-14                                                                                      |          |  |              |  |           |  |          |  |          |  |
| 2007-06-15                                                                                      |          |  |              |  |           |  |          |  |          |  |
| 2007-06-16                                                                                      |          |  |              |  |           |  |          |  |          |  |
| 2007-06-17                                                                                      |          |  |              |  |           |  |          |  |          |  |
| 2007-06-18                                                                                      |          |  |              |  |           |  |          |  |          |  |
| 2007-06-19                                                                                      |          |  |              |  |           |  |          |  |          |  |
| 2007-06-20                                                                                      |          |  |              |  |           |  |          |  |          |  |
| 2007-06-21                                                                                      |          |  |              |  |           |  |          |  |          |  |
| 2007-06-22                                                                                      |          |  |              |  |           |  |          |  |          |  |
| 2007-06-23                                                                                      |          |  |              |  |           |  |          |  |          |  |
| 2007-06-24                                                                                      |          |  |              |  |           |  |          |  |          |  |
| 2007-06-25                                                                                      |          |  |              |  |           |  |          |  |          |  |
| 2007-06-26                                                                                      |          |  |              |  |           |  |          |  |          |  |
| 2007-06-27                                                                                      |          |  |              |  |           |  |          |  |          |  |
| 2007-06-28                                                                                      |          |  |              |  |           |  |          |  |          |  |
| 2007-06-29                                                                                      |          |  |              |  |           |  |          |  |          |  |
| 2007-06-30                                                                                      |          |  |              |  |           |  |          |  |          |  |
| 2007-07-01                                                                                      |          |  |              |  |           |  |          |  |          |  |
| 2007-07-02                                                                                      |          |  |              |  |           |  |          |  |          |  |
| 2007-07-03                                                                                      |          |  |              |  |           |  |          |  |          |  |
| 2007-07-04                                                                                      |          |  |              |  |           |  |          |  |          |  |
| 2007-07-05                                                                                      |          |  |              |  |           |  |          |  |          |  |
| 2007-07-06                                                                                      |          |  |              |  |           |  |          |  |          |  |
| 2007-07-07                                                                                      |          |  |              |  |           |  |          |  |          |  |
| 2007-07-08                                                                                      |          |  |              |  |           |  |          |  |          |  |
| 2007-07-09                                                                                      |          |  |              |  |           |  |          |  |          |  |
| 2007-07-10                                                                                      |          |  |              |  |           |  |          |  |          |  |
| 2007-07-11                                                                                      |          |  |              |  |           |  |          |  |          |  |
| 2007-07-12                                                                                      |          |  |              |  |           |  |          |  |          |  |
| 2007-07-13                                                                                      |          |  |              |  |           |  |          |  |          |  |
| 2007-07-14                                                                                      |          |  |              |  |           |  |          |  |          |  |
| 2007-07-15                                                                                      |          |  |              |  |           |  |          |  |          |  |
| 2007-07-16                                                                                      |          |  |              |  |           |  |          |  |          |  |
| 2007-07-17                                                                                      |          |  |              |  |           |  |          |  |          |  |
| 2007-07-18                                                                                      |          |  |              |  |           |  |          |  |          |  |
| 2007-07-19                                                                                      |          |  |              |  |           |  |          |  |          |  |
| 2007-07-20                                                                                      |          |  |              |  |           |  |          |  |          |  |
| 2007-07-21                                                                                      |          |  |              |  |           |  |          |  |          |  |
| 2007-07-22                                                                                      |          |  |              |  |           |  |          |  |          |  |
| 2007-07-23                                                                                      |          |  |              |  |           |  |          |  |          |  |
| 2007-07-24                                                                                      |          |  |              |  |           |  |          |  |          |  |
| 2007-07-25                                                                                      |          |  |              |  |           |  |          |  |          |  |
| 2007-07-26                                                                                      |          |  |              |  |           |  |          |  |          |  |
| 2007-07-27                                                                                      |          |  |              |  |           |  |          |  |          |  |
| 2007-07-28                                                                                      |          |  |              |  |           |  |          |  |          |  |
| 2007-07-29                                                                                      |          |  |              |  |           |  |          |  |          |  |
| 2007-07-30                                                                                      |          |  |              |  |           |  |          |  |          |  |
| 2007-07-31                                                                                      |          |  |              |  |           |  |          |  |          |  |
| 2007-08-01                                                                                      |          |  |              |  |           |  |          |  |          |  |
| 2007-08-02                                                                                      |          |  |              |  |           |  |          |  |          |  |
| 2007-08-03                                                                                      |          |  |              |  |           |  |          |  |          |  |
| 2007-08-04                                                                                      |          |  |              |  |           |  |          |  |          |  |
| 2007-08-05                                                                                      |          |  |              |  |           |  |          |  |          |  |
| 2007-08-06                                                                                      |          |  |              |  |           |  |          |  |          |  |
| 2007-08-07                                                                                      |          |  |              |  |           |  |          |  |          |  |
| 2007-08-08                                                                                      |          |  |              |  |           |  |          |  |          |  |
| 2007-08-09                                                                                      |          |  |              |  |           |  |          |  |          |  |
| 2007-08-10                                                                                      |          |  |              |  |           |  |          |  |          |  |
| 2007-08-11                                                                                      |          |  |              |  |           |  |          |  |          |  |
| 2007-08-12                                                                                      |          |  |              |  |           |  |          |  |          |  |
| 2007-08-13                                                                                      |          |  |              |  |           |  |          |  |          |  |
| 2007-08-14                                                                                      |          |  |              |  |           |  |          |  |          |  |
| 2007-08-15                                                                                      |          |  |              |  |           |  |          |  |          |  |
| 2007-08-16                                                                                      |          |  |              |  |           |  |          |  |          |  |
| 2007-08-17                                                                                      |          |  |              |  |           |  |          |  |          |  |
| 2007-08-18                                                                                      |          |  |              |  |           |  |          |  |          |  |
| 2007-08-19                                                                                      |          |  |              |  |           |  |          |  |          |  |
| 2007-08-20                                                                                      |          |  |              |  |           |  |          |  |          |  |
| 2007-08-21                                                                                      |          |  |              |  |           |  |          |  |          |  |
| 2007-08-22                                                                                      |          |  |              |  |           |  |          |  |          |  |
| 2007-08-23                                                                                      |          |  |              |  |           |  |          |  |          |  |
| 2007-08-24                                                                                      |          |  |              |  |           |  |          |  |          |  |
| 2007-08-25                                                                                      |          |  |              |  |           |  |          |  |          |  |
| 2007-08-26                                                                                      |          |  |              |  |           |  |          |  |          |  |
| 2007-08-27                                                                                      |          |  |              |  |           |  |          |  |          |  |
| 2007-08-28                                                                                      |          |  |              |  |           |  |          |  |          |  |
| 2007-08-29                                                                                      |          |  |              |  |           |  |          |  |          |  |
| 2007-08-30                                                                                      |          |  |              |  |           |  |          |  |          |  |
| 2007-08-31                                                                                      |          |  |              |  |           |  |          |  |          |  |
| 2007-09-01                                                                                      |          |  |              |  |           |  |          |  |          |  |
| 2007-09-02                                                                                      |          |  |              |  |           |  |          |  |          |  |
| 2007-09-03                                                                                      |          |  |              |  |           |  |          |  |          |  |
| 2007-09-04                                                                                      |          |  |              |  |           |  |          |  |          |  |
| 2007-09-05                                                                                      |          |  |              |  |           |  |          |  |          |  |
| 2007-09-06                                                                                      |          |  |              |  |           |  |          |  |          |  |
| 2007-09-07                                                                                      |          |  |              |  |           |  |          |  |          |  |
| 2007-09-08                                                                                      |          |  |              |  |           |  |          |  |          |  |
| 2007-09-09                                                                                      |          |  |              |  |           |  |          |  |          |  |
| 2007-09-10                                                                                      |          |  |              |  |           |  |          |  |          |  |
| 2007-09-11                                                                                      |          |  |              |  |           |  |          |  |          |  |
| 2007-09-12                                                                                      |          |  |              |  |           |  |          |  |          |  |
| 2007-09-13                                                                                      |          |  |              |  |           |  |          |  |          |  |
| 2007-09-14                                                                                      |          |  |              |  |           |  |          |  |          |  |
| 2007-09-15                                                                                      |          |  |              |  |           |  |          |  |          |  |
| 2007-09-16                                                                                      |          |  |              |  |           |  |          |  |          |  |
| 2007-09-17                                                                                      |          |  |              |  |           |  |          |  |          |  |
| 2007-09-18                                                                                      |          |  |              |  |           |  |          |  |          |  |
| 2007-09-19                                                                                      |          |  |              |  |           |  |          |  |          |  |
| 2007-09-20                                                                                      |          |  |              |  |           |  |          |  |          |  |
| 2007-09-21                                                                                      |          |  |              |  |           |  |          |  |          |  |
| 2007-09-22                                                                                      |          |  |              |  |           |  |          |  |          |  |
| 2007-09-23                                                                                      |          |  |              |  |           |  |          |  |          |  |
| 2007-09-24                                                                                      |          |  |              |  |           |  |          |  |          |  |
| 2007-09-25                                                                                      |          |  |              |  |           |  |          |  |          |  |
| 2007-09-26                                                                                      |          |  |              |  |           |  |          |  |          |  |
| 2007-09-27                                                                                      |          |  |              |  |           |  |          |  |          |  |
| 2007-09-28                                                                                      |          |  |              |  |           |  |          |  |          |  |
| 2007-09-29                                                                                      |          |  |              |  |           |  |          |  |          |  |
| 2007-09-30                                                                                      |          |  |              |  |           |  |          |  |          |  |

## Southwest

Category:  No Alert  Category 2  Category 1  Category 0

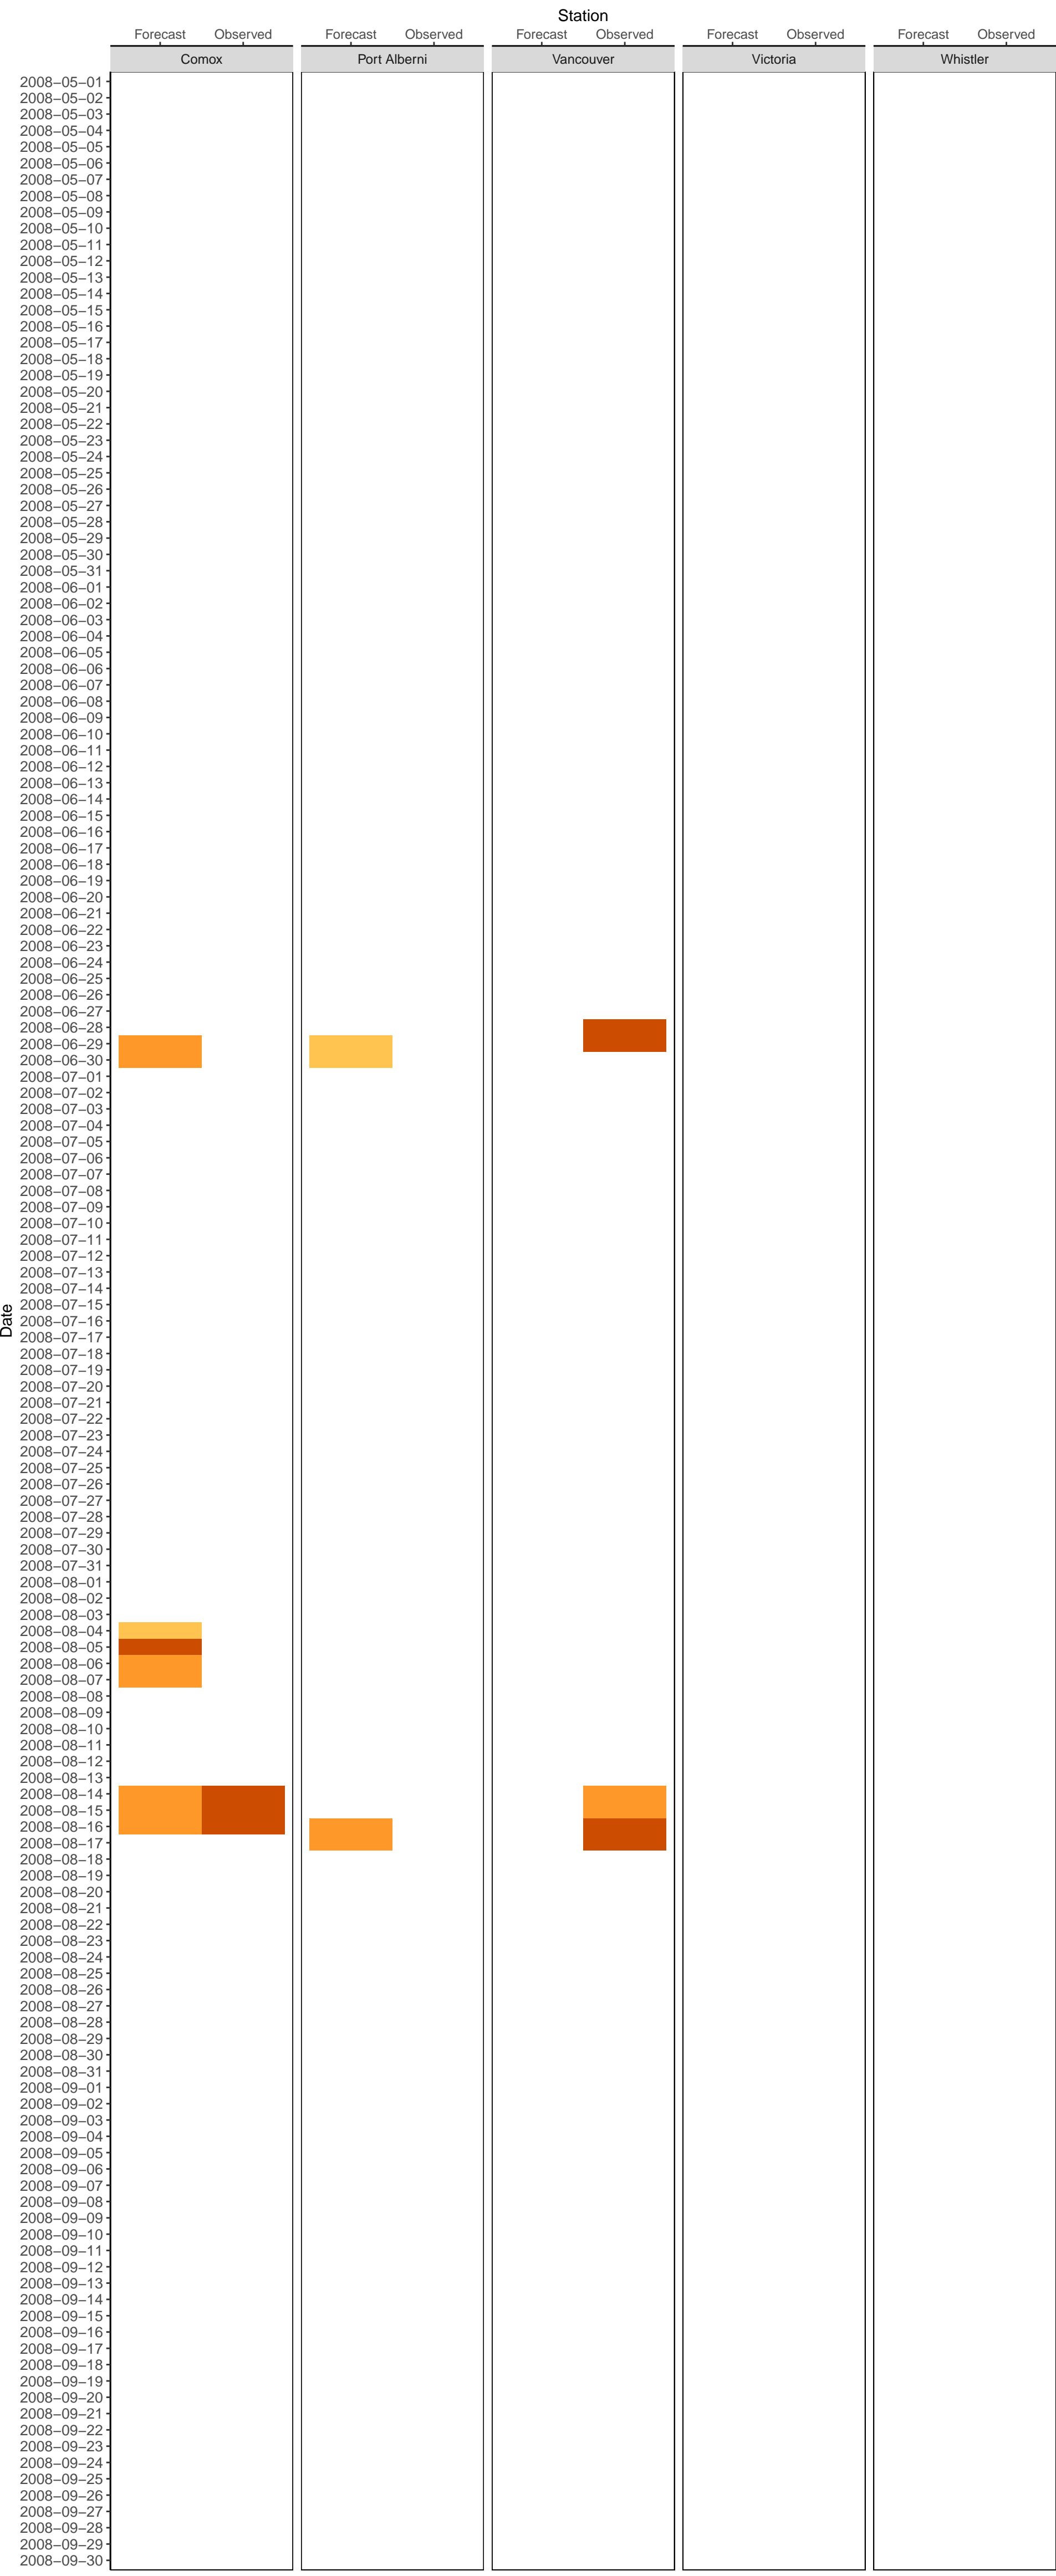

## Southwest

Category:  No Alert  Category 2  Category 1  Category 0

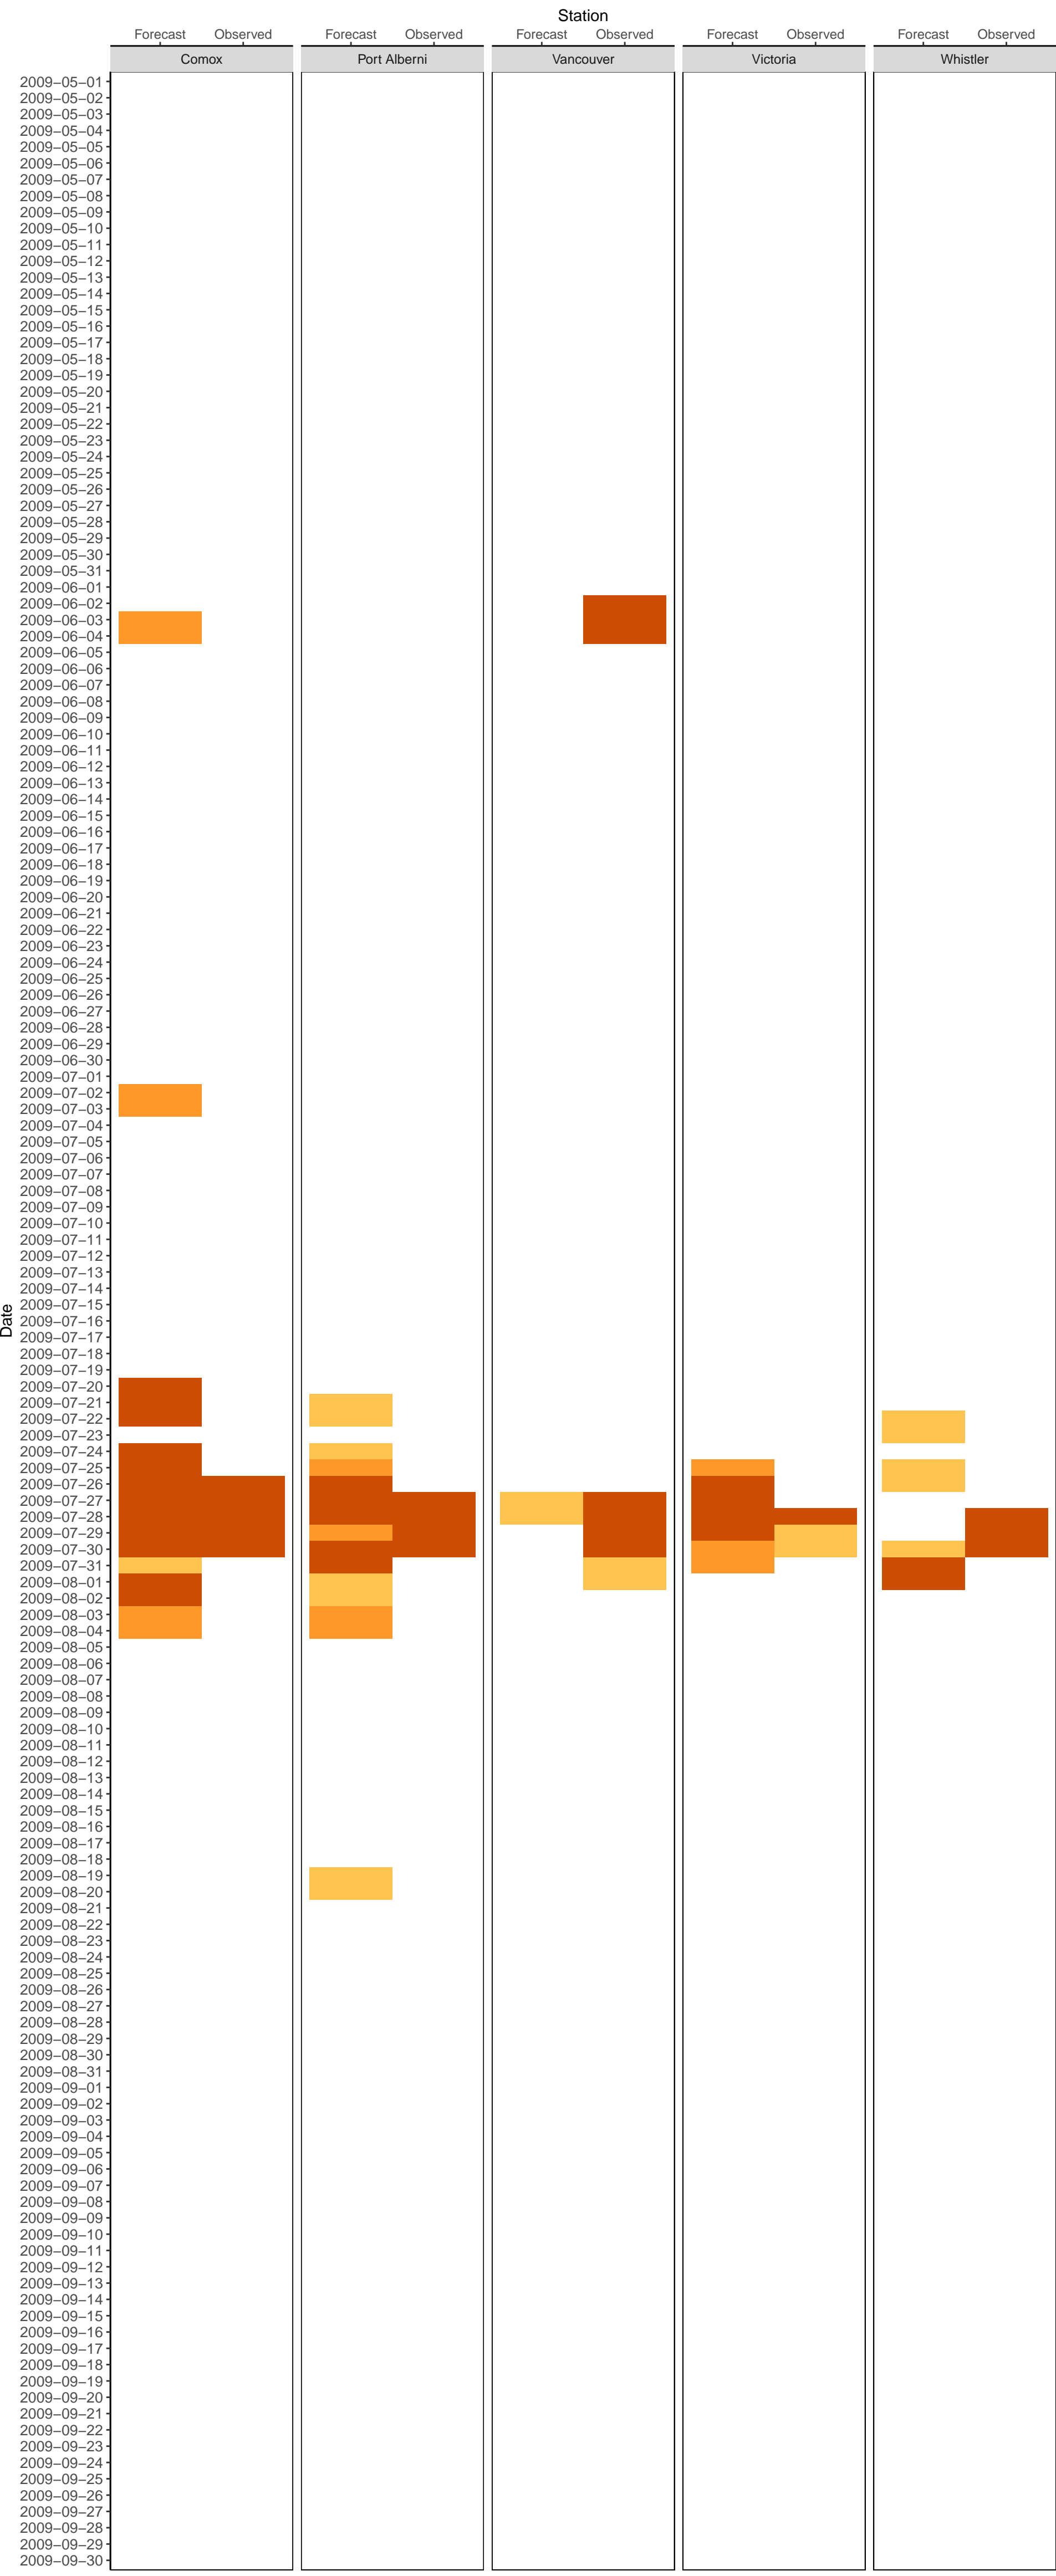



## Southwest

Category:  No Alert  Category 2  Category 1  Category 0

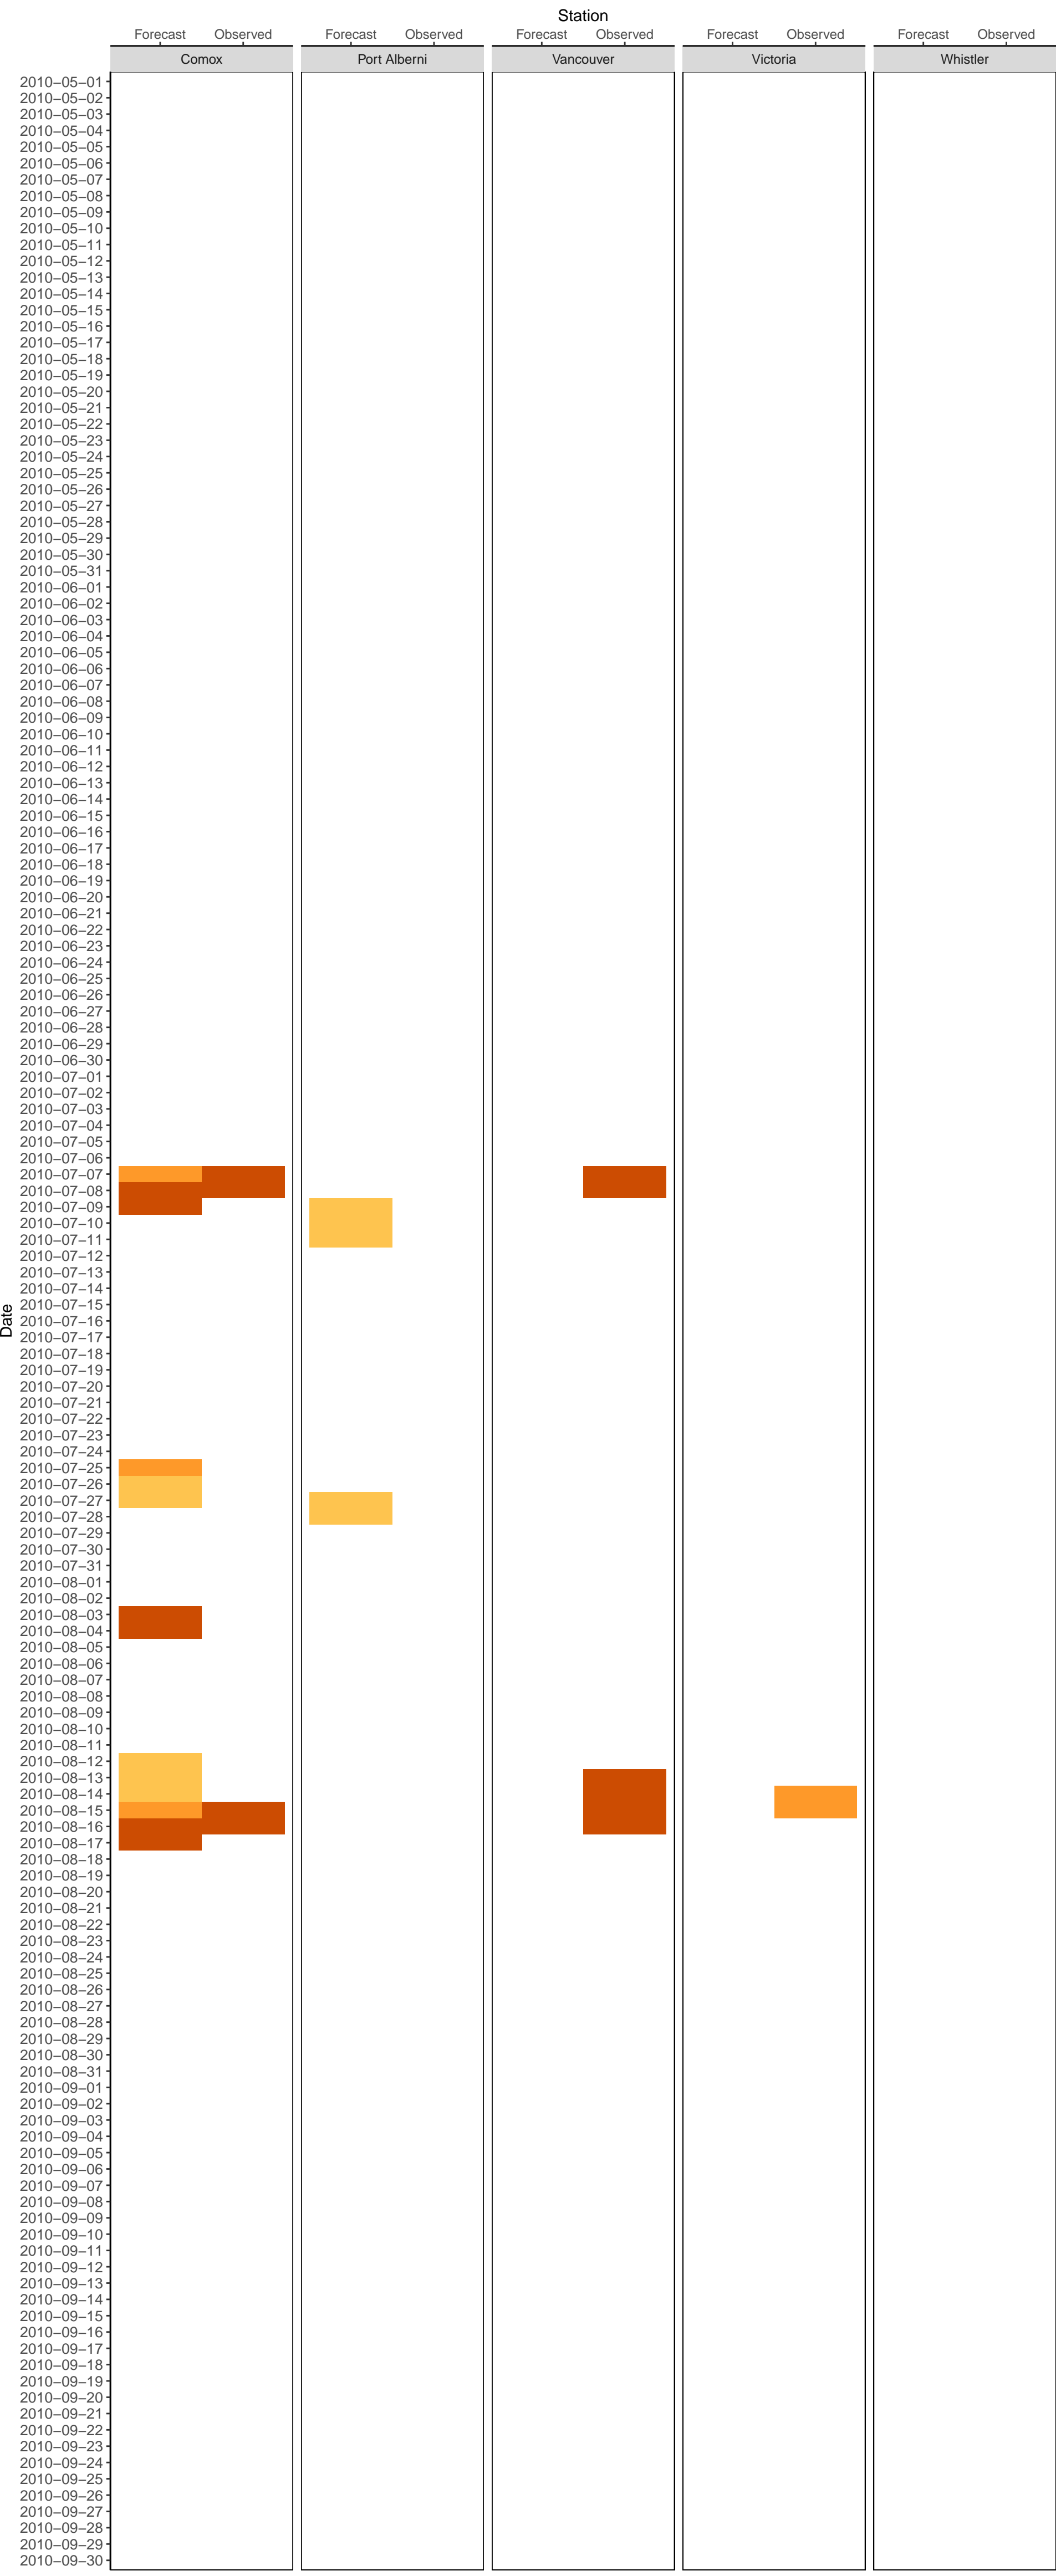

## Southwest

Category:  No Alert  Category 2  Category 1  Category 0

[illegible]



## Southwest

Category: ☐ No Alert ☒ Category 2 ☐ Category 1 ☐ Category 0

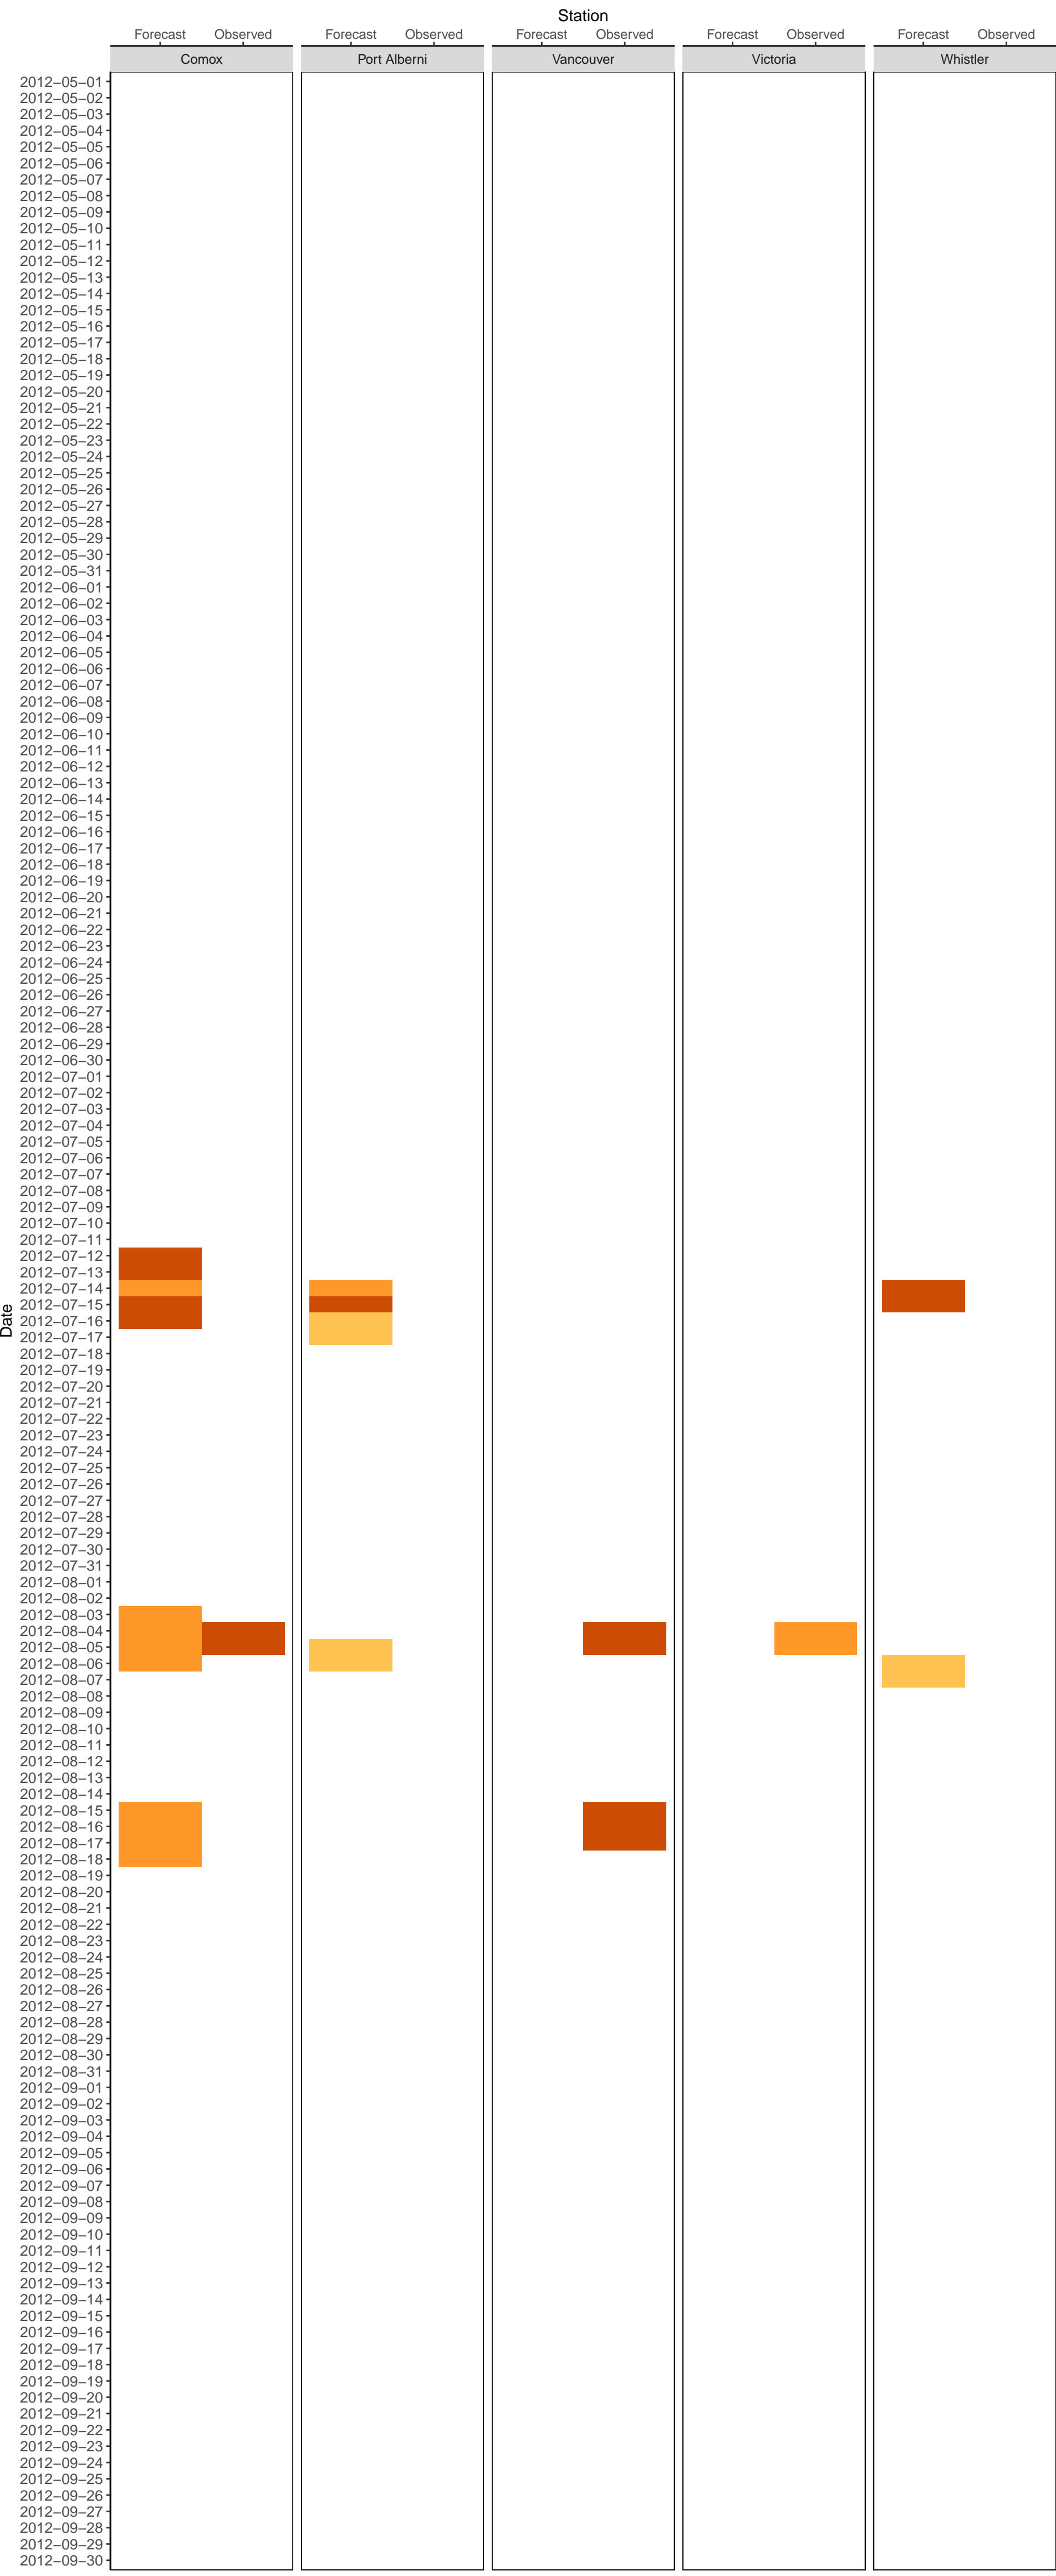

| Southwest  |           |          |              |          |            |          |            |          |            |          |
|------------|-----------|----------|--------------|----------|------------|----------|------------|----------|------------|----------|
| Date       | Category: |          | No Alert     |          | Category 2 |          | Category 1 |          | Category 0 |          |
|            |           |          |              |          |            |          |            |          |            |          |
|            | Forecast  | Observed | Forecast     | Observed | Forecast   | Observed | Forecast   | Observed | Forecast   | Observed |
|            | Comox     |          | Port Alberni |          | Vancouver  |          | Victoria   |          | Whistler   |          |
| 2013-05-01 |           |          |              |          |            |          |            |          |            |          |
| 2013-05-02 |           |          |              |          |            |          |            |          |            |          |
| 2013-05-03 |           |          |              |          |            |          |            |          |            |          |
| 2013-05-04 |           |          |              |          |            |          |            |          |            |          |
| 2013-05-05 |           |          |              |          |            |          |            |          |            |          |
| 2013-05-06 |           |          |              |          |            |          |            |          |            |          |
| 2013-05-07 |           |          |              |          |            |          |            |          |            |          |
| 2013-05-08 |           |          |              |          |            |          |            |          |            |          |
| 2013-05-09 |           |          |              |          |            |          |            |          |            |          |
| 2013-05-10 |           |          |              |          |            |          |            |          |            |          |
| 2013-05-11 |           |          |              |          |            |          |            |          |            |          |
| 2013-05-12 |           |          |              |          |            |          |            |          |            |          |
| 2013-05-13 |           |          |              |          |            |          |            |          |            |          |
| 2013-05-14 |           |          |              |          |            |          |            |          |            |          |
| 2013-05-15 |           |          |              |          |            |          |            |          |            |          |
| 2013-05-16 |           |          |              |          |            |          |            |          |            |          |
| 2013-05-17 |           |          |              |          |            |          |            |          |            |          |
| 2013-05-18 |           |          |              |          |            |          |            |          |            |          |
| 2013-05-19 |           |          |              |          |            |          |            |          |            |          |
| 2013-05-20 |           |          |              |          |            |          |            |          |            |          |
| 2013-05-21 |           |          |              |          |            |          |            |          |            |          |
| 2013-05-22 |           |          |              |          |            |          |            |          |            |          |
| 2013-05-23 |           |          |              |          |            |          |            |          |            |          |
| 2013-05-24 |           |          |              |          |            |          |            |          |            |          |
| 2013-05-25 |           |          |              |          |            |          |            |          |            |          |
| 2013-05-26 |           |          |              |          |            |          |            |          |            |          |
| 2013-05-27 |           |          |              |          |            |          |            |          |            |          |
| 2013-05-28 |           |          |              |          |            |          |            |          |            |          |
| 2013-05-29 |           |          |              |          |            |          |            |          |            |          |
| 2013-05-30 |           |          |              |          |            |          |            |          |            |          |
| 2013-05-31 |           |          |              |          |            |          |            |          |            |          |
| 2013-06-01 |           |          |              |          |            |          |            |          |            |          |
| 2013-06-02 |           |          |              |          |            |          |            |          |            |          |
| 2013-06-03 |           |          |              |          |            |          |            |          |            |          |
| 2013-06-04 |           |          |              |          |            |          |            |          |            |          |
| 2013-06-05 |           |          |              |          |            |          |            |          |            |          |
| 2013-06-06 |           |          |              |          |            |          |            |          |            |          |
| 2013-06-07 |           |          |              |          |            |          |            |          |            |          |
| 2013-06-08 |           |          |              |          |            |          |            |          |            |          |
| 2013-06-09 |           |          |              |          |            |          |            |          |            |          |
| 2013-06-10 |           |          |              |          |            |          |            |          |            |          |
| 2013-06-11 |           |          |              |          |            |          |            |          |            |          |
| 2013-06-12 |           |          |              |          |            |          |            |          |            |          |
| 2013-06-13 |           |          |              |          |            |          |            |          |            |          |
| 2013-06-14 |           |          |              |          |            |          |            |          |            |          |
| 2013-06-15 |           |          |              |          |            |          |            |          |            |          |
| 2013-06-16 |           |          |              |          |            |          |            |          |            |          |
| 2013-06-17 |           |          |              |          |            |          |            |          |            |          |
| 2013-06-18 |           |          |              |          |            |          |            |          |            |          |
| 2013-06-19 |           |          |              |          |            |          |            |          |            |          |
| 2013-06-20 |           |          |              |          |            |          |            |          |            |          |
| 2013-06-21 |           |          |              |          |            |          |            |          |            |          |
| 2013-06-22 |           |          |              |          |            |          |            |          |            |          |
| 2013-06-23 |           |          |              |          |            |          |            |          |            |          |
| 2013-06-24 |           |          |              |          |            |          |            |          |            |          |
| 2013-06-25 |           |          |              |          |            |          |            |          |            |          |
| 2013-06-26 |           |          |              |          |            |          |            |          |            |          |
| 2013-06-27 |           |          |              |          |            |          |            |          |            |          |
| 2013-06-28 |           |          |              |          |            |          |            |          |            |          |
| 2013-06-29 |           |          |              |          |            |          |            |          |            |          |
| 2013-06-30 |           |          |              |          |            |          |            |          |            |          |
| 2013-07-01 |           |          |              |          |            |          |            |          |            |          |
| 2013-07-02 |           |          |              |          |            |          |            |          |            |          |
| 2013-07-03 |           |          |              |          |            |          |            |          |            |          |
| 2013-07-04 |           |          |              |          |            |          |            |          |            |          |
| 2013-07-05 |           |          |              |          |            |          |            |          |            |          |
| 2013-07-06 |           |          |              |          |            |          |            |          |            |          |
| 2013-07-07 |           |          |              |          |            |          |            |          |            |          |
| 2013-07-08 |           |          |              |          |            |          |            |          |            |          |
| 2013-07-09 |           |          |              |          |            |          |            |          |            |          |
| 2013-07-10 |           |          |              |          |            |          |            |          |            |          |
| 2013-07-11 |           |          |              |          |            |          |            |          |            |          |
| 2013-07-12 |           |          |              |          |            |          |            |          |            |          |
| 2013-07-13 |           |          |              |          |            |          |            |          |            |          |
| 2013-07-14 |           |          |              |          |            |          |            |          |            |          |
| 2013-07-15 |           |          |              |          |            |          |            |          |            |          |
| 2013-07-16 |           |          |              |          |            |          |            |          |            |          |
| 2013-07-17 |           |          |              |          |            |          |            |          |            |          |
| 2013-07-18 |           |          |              |          |            |          |            |          |            |          |
| 2013-07-19 |           |          |              |          |            |          |            |          |            |          |
| 2013-07-20 |           |          |              |          |            |          |            |          |            |          |
| 2013-07-21 |           |          |              |          |            |          |            |          |            |          |
| 2013-07-22 |           |          |              |          |            |          |            |          |            |          |
| 2013-07-23 |           |          |              |          |            |          |            |          |            |          |
| 2013-07-24 |           |          |              |          |            |          |            |          |            |          |
| 2013-07-25 |           |          |              |          |            |          |            |          |            |          |
| 2013-07-26 |           |          |              |          |            |          |            |          |            |          |
| 2013-07-27 |           |          |              |          |            |          |            |          |            |          |
| 2013-07-28 |           |          |              |          |            |          |            |          |            |          |
| 2013-07-29 |           |          |              |          |            |          |            |          |            |          |
| 2013-07-30 |           |          |              |          |            |          |            |          |            |          |
| 2013-07-31 |           |          |              |          |            |          |            |          |            |          |
| 2013-08-01 |           |          |              |          |            |          |            |          |            |          |
| 2013-08-02 |           |          |              |          |            |          |            |          |            |          |
| 2013-08-03 |           |          |              |          |            |          |            |          |            |          |
| 2013-08-04 |           |          |              |          |            |          |            |          |            |          |
| 2013-08-05 |           |          |              |          |            |          |            |          |            |          |
| 2013-08-06 |           |          |              |          |            |          |            |          |            |          |
| 2013-08-07 |           |          |              |          |            |          |            |          |            |          |
| 2013-08-08 |           |          |              |          |            |          |            |          |            |          |
| 2013-08-09 |           |          |              |          |            |          |            |          |            |          |
| 2013-08-10 |           |          |              |          |            |          |            |          |            |          |
| 2013-08-11 |           |          |              |          |            |          |            |          |            |          |
| 2013-08-12 |           |          |              |          |            |          |            |          |            |          |
| 2013-08-13 |           |          |              |          |            |          |            |          |            |          |
| 2013-08-14 |           |          |              |          |            |          |            |          |            |          |
| 2013-08-15 |           |          |              |          |            |          |            |          |            |          |
| 2013-08-16 |           |          |              |          |            |          |            |          |            |          |
| 2013-08-17 |           |          |              |          |            |          |            |          |            |          |
| 2013-08-18 |           |          |              |          |            |          |            |          |            |          |
| 2013-08-19 |           |          |              |          |            |          |            |          |            |          |
| 2013-08-20 |           |          |              |          |            |          |            |          |            |          |
| 2013-08-21 |           |          |              |          |            |          |            |          |            |          |
| 2013-08-22 |           |          |              |          |            |          |            |          |            |          |
| 2013-08-23 |           |          |              |          |            |          |            |          |            |          |
| 2013-08-24 |           |          |              |          |            |          |            |          |            |          |
| 2013-08-25 |           |          |              |          |            |          |            |          |            |          |
| 2013-08-26 |           |          |              |          |            |          |            |          |            |          |
| 2013-08-27 |           |          |              |          |            |          |            |          |            |          |
| 2013-08-28 |           |          |              |          |            |          |            |          |            |          |
| 2013-08-29 |           |          |              |          |            |          |            |          |            |          |
| 2013-08-30 |           |          |              |          |            |          |            |          |            |          |
| 2013-08-31 |           |          |              |          |            |          |            |          |            |          |
| 2013-09-01 |           |          |              |          |            |          |            |          |            |          |
| 2013-09-02 |           |          |              |          |            |          |            |          |            |          |
| 2013-09-03 |           |          |              |          |            |          |            |          |            |          |
| 2013-09-04 |           |          |              |          |            |          |            |          |            |          |
| 2013-09-05 |           |          |              |          |            |          |            |          |            |          |
| 2013-09-06 |           |          |              |          |            |          |            |          |            |          |
| 2013-09-07 |           |          |              |          |            |          |            |          |            |          |
| 2013-09-08 |           |          |              |          |            |          |            |          |            |          |
| 2013-09-09 |           |          |              |          |            |          |            |          |            |          |
| 2013-09-10 |           |          |              |          |            |          |            |          |            |          |
| 2013-09-11 |           |          |              |          |            |          |            |          |            |          |
| 2013-09-12 |           |          |              |          |            |          |            |          |            |          |
| 2013-09-13 |           |          |              |          |            |          |            |          |            |          |
| 2013-09-14 |           |          |              |          |            |          |            |          |            |          |
| 2013-09-15 |           |          |              |          |            |          |            |          |            |          |
| 2013-09-16 |           |          |              |          |            |          |            |          |            |          |
| 2013-09-17 |           |          |              |          |            |          |            |          |            |          |
| 2013-09-18 |           |          |              |          |            |          |            |          |            |          |
| 2013-09-19 |           |          |              |          |            |          |            |          |            |          |
| 2013-09-20 |           |          |              |          |            |          |            |          |            |          |
| 2013-09-21 |           |          |              |          |            |          |            |          |            |          |
| 2013-09-22 |           |          |              |          |            |          |            |          |            |          |
| 2013-09-23 |           |          |              |          |            |          |            |          |            |          |
| 2013-09-24 |           |          |              |          |            |          |            |          |            |          |
| 2013-09-25 |           |          |              |          |            |          |            |          |            |          |
| 2013-09-26 |           |          |              |          |            |          |            |          |            |          |
| 2013-09-27 |           |          |              |          |            |          |            |          |            |          |
| 2013-09-28 |           |          |              |          |            |          |            |          |            |          |
| 2013-09-29 |           |          |              |          |            |          |            |          |            |          |
| 2013-09-30 |           |          |              |          |            |          |            |          |            |          |

## Southwest

Category: ☐ No Alert ☒ Category 2 ☐ Category 1 ☐ Category 0

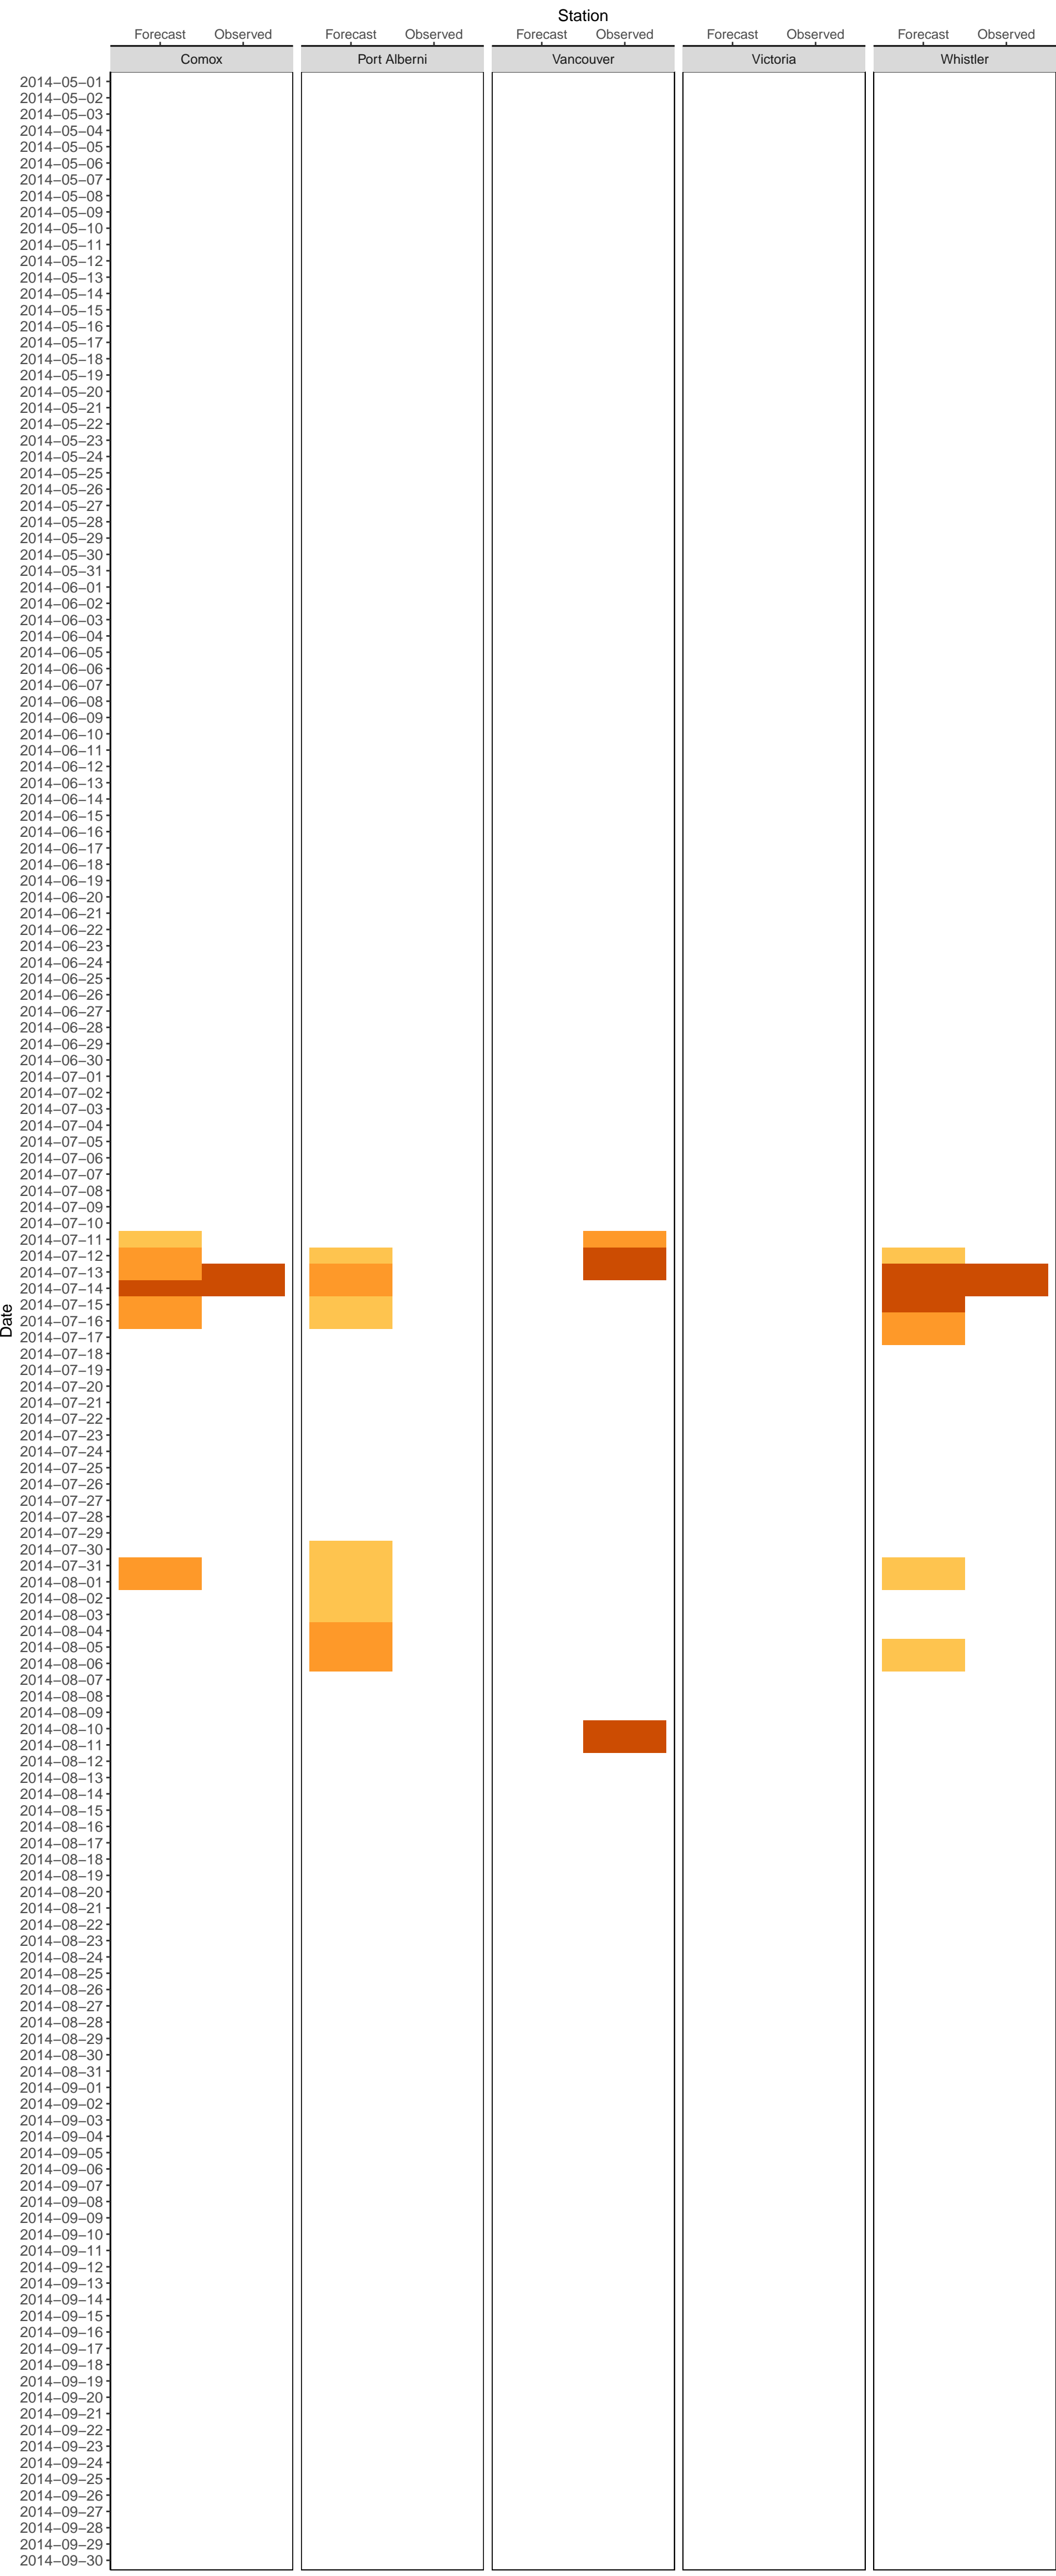

## Southwest

Category:  No Alert  Category 2  Category 1  Category 0

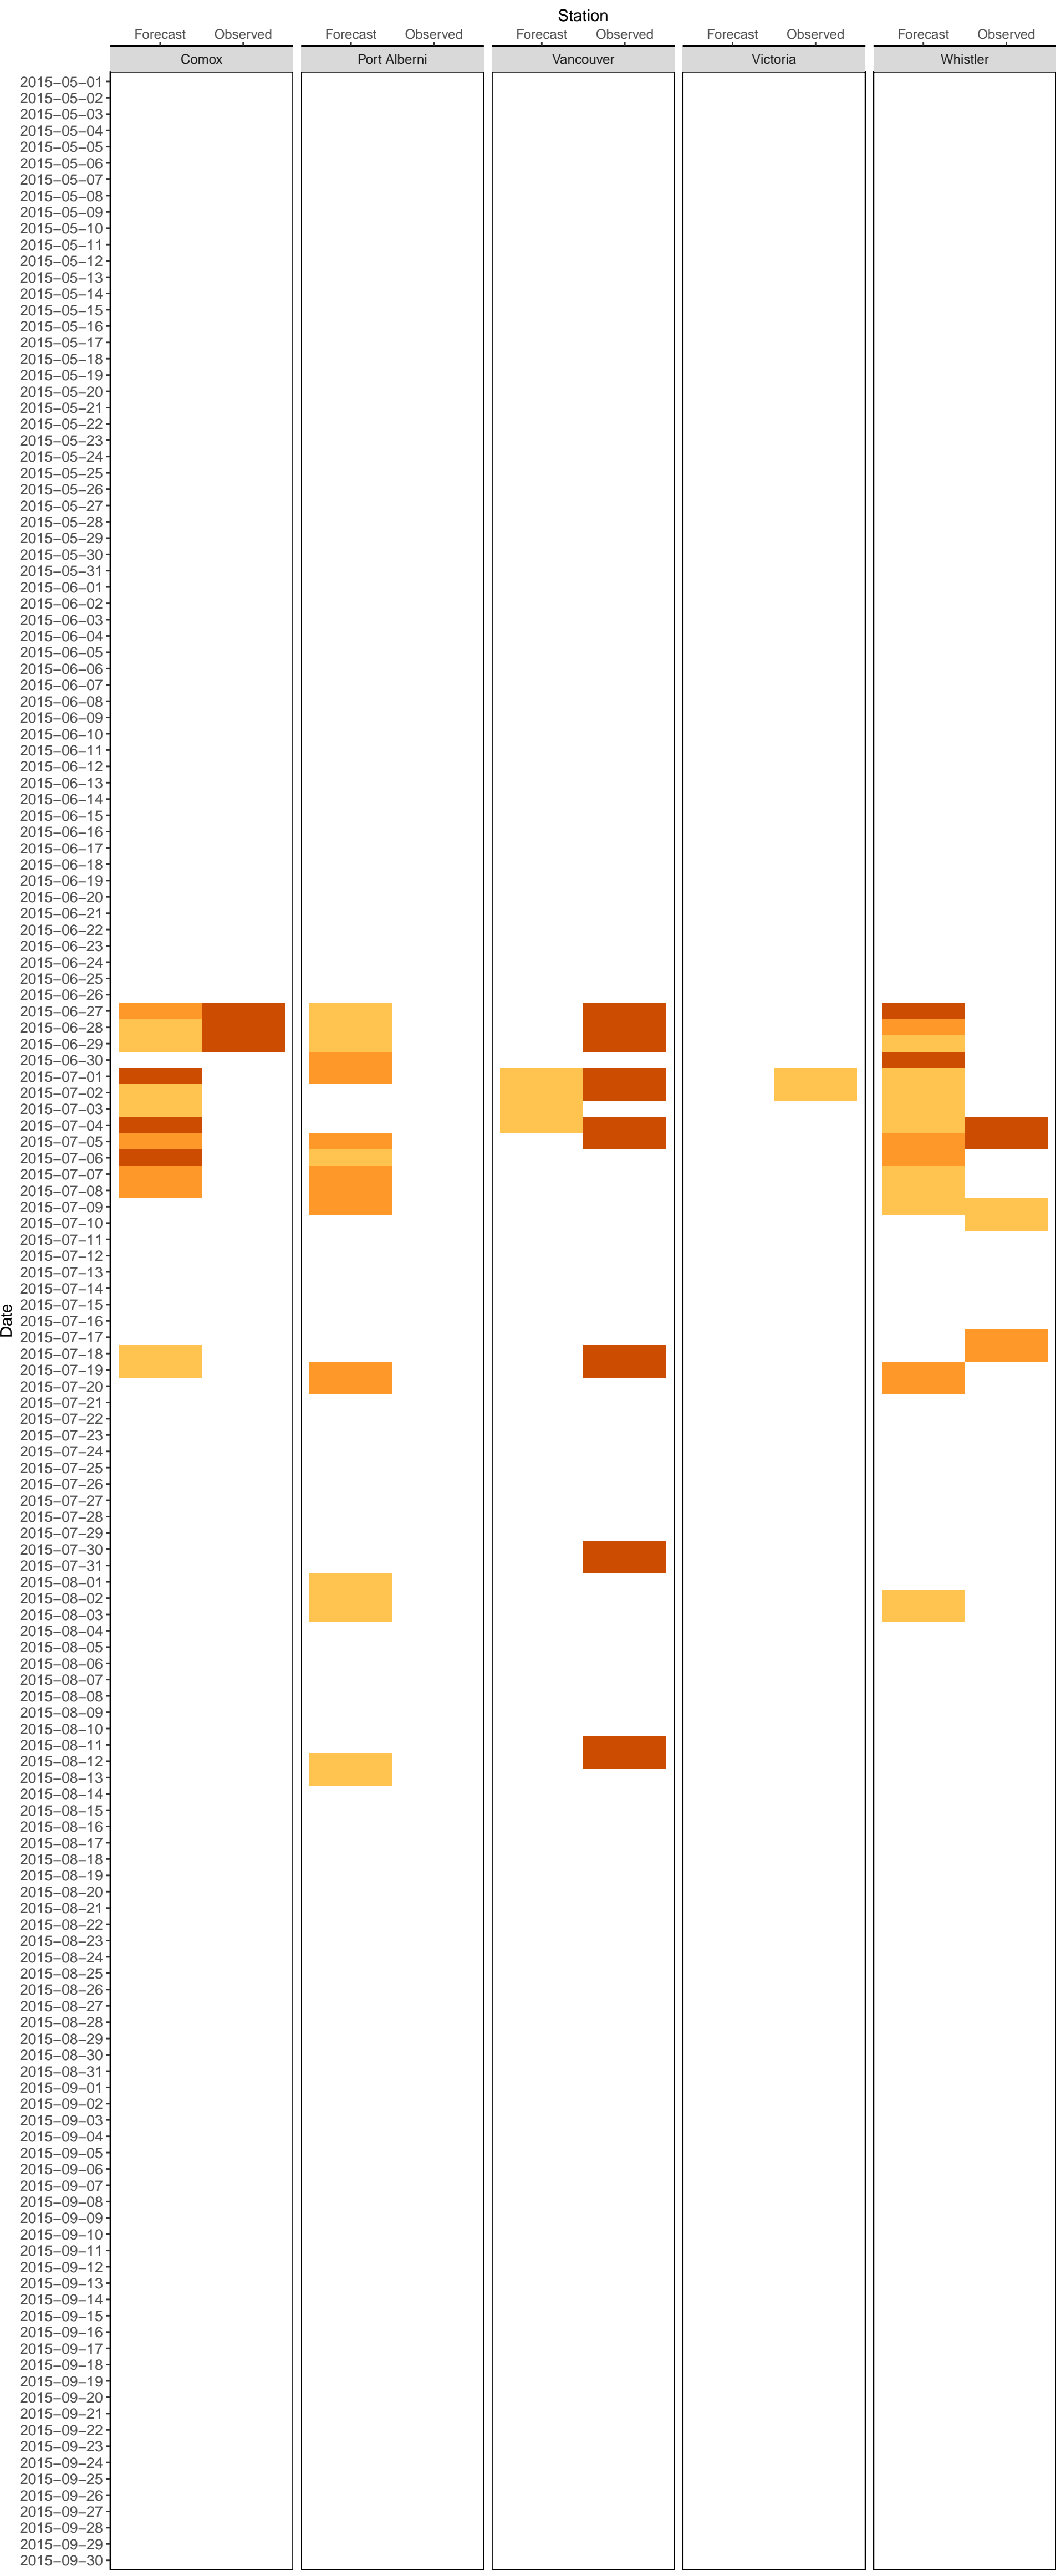

## Southwest

Category: ☐ No Alert ☒ Category 2 ☐ Category 1 ☐ Category 0

[illegible]
